# Supplementary material for: Copper/β-diketone-catalysed N-arylation of carbazoles
Source: Royal Society of Chemistry journal article supplement (doi:10.1039/c5ra07690k), 2015-01-01

*Supporting information for*

**Copper/ $\beta$ -Diketone-Catalysed N-Arylation of Carbazoles**

Fei Chen, Ning Liu,\* Enhui Ji, Bin Dai,\*

*School of Chemistry and Chemical Engineering, the Key Laboratory for Green Processing of  
Chemical Engineering of Xinjiang Bingtuan, Shihezi University, North 4th Road, Shihezi, Xinjiang  
832003, China*

Fax.: (+0086)-0993-205-7270; phone: (+0086)-0993-205-7277; e-mail: ninglau@163.com  
(N. Liu) ; dbinly@126.com (B. Dai)

**Contents**

NMR Spectra for Products

S2-S53

# NMR Spectra for all Cross-Coupling Products

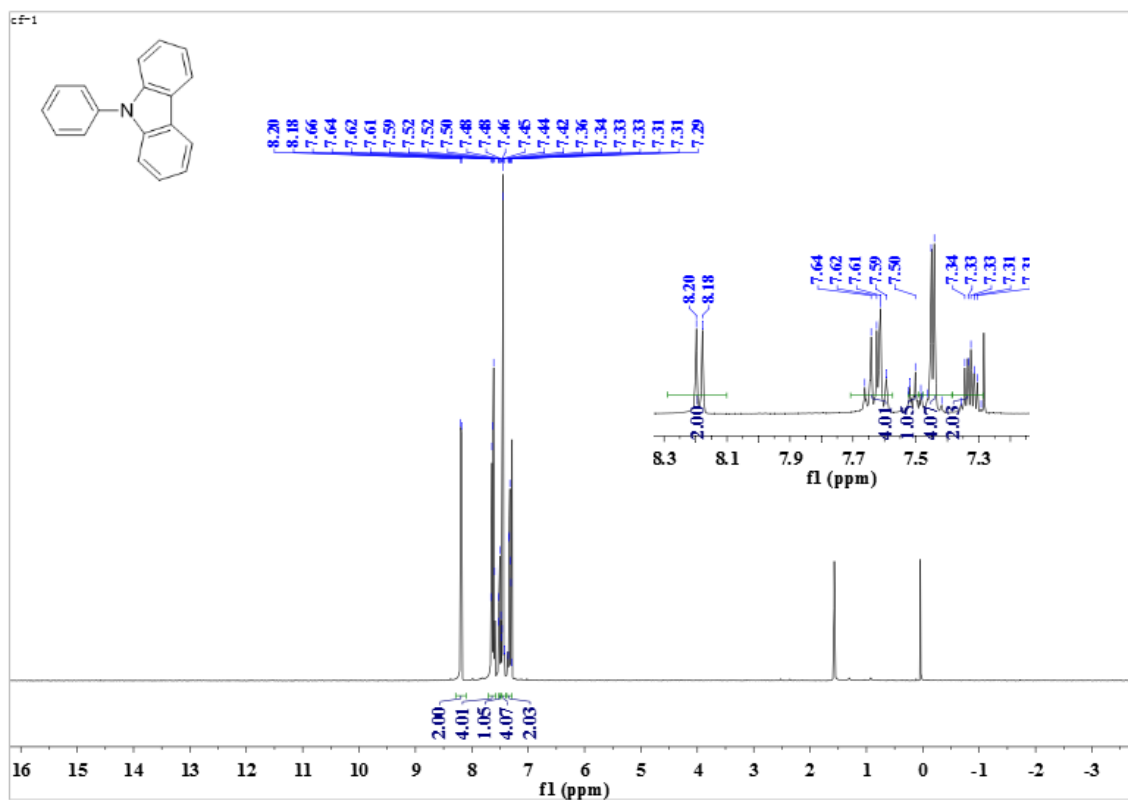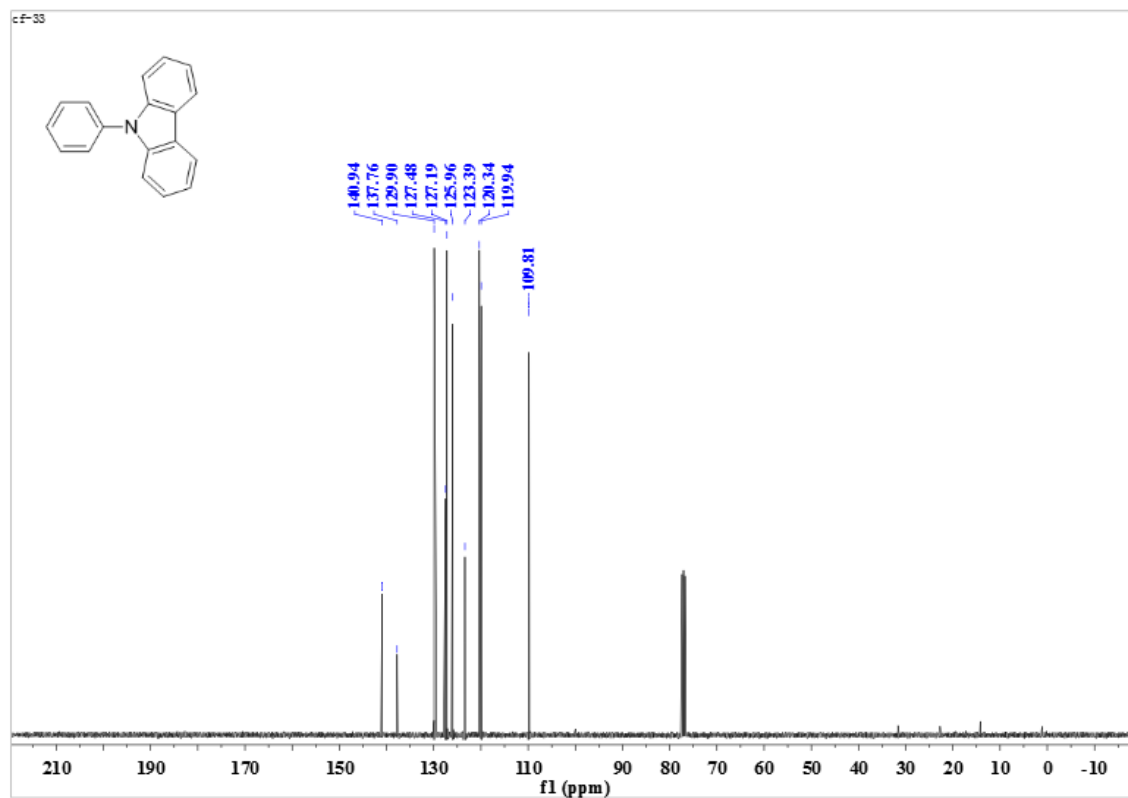

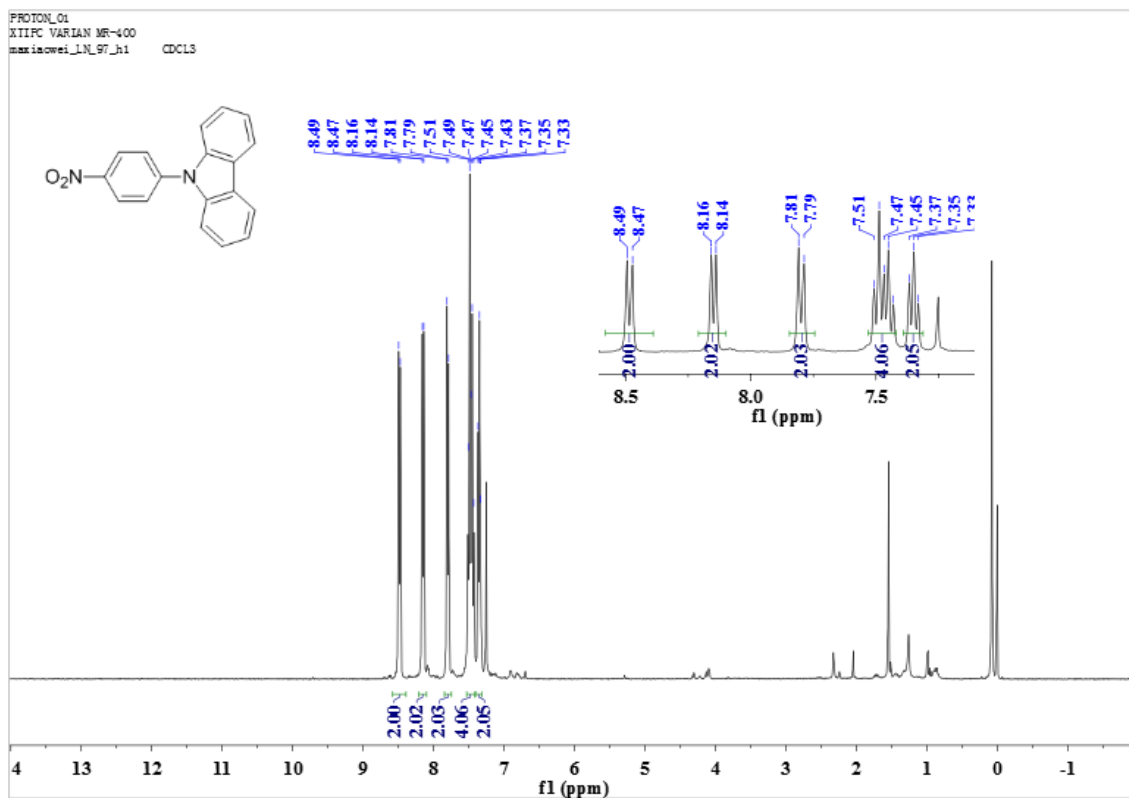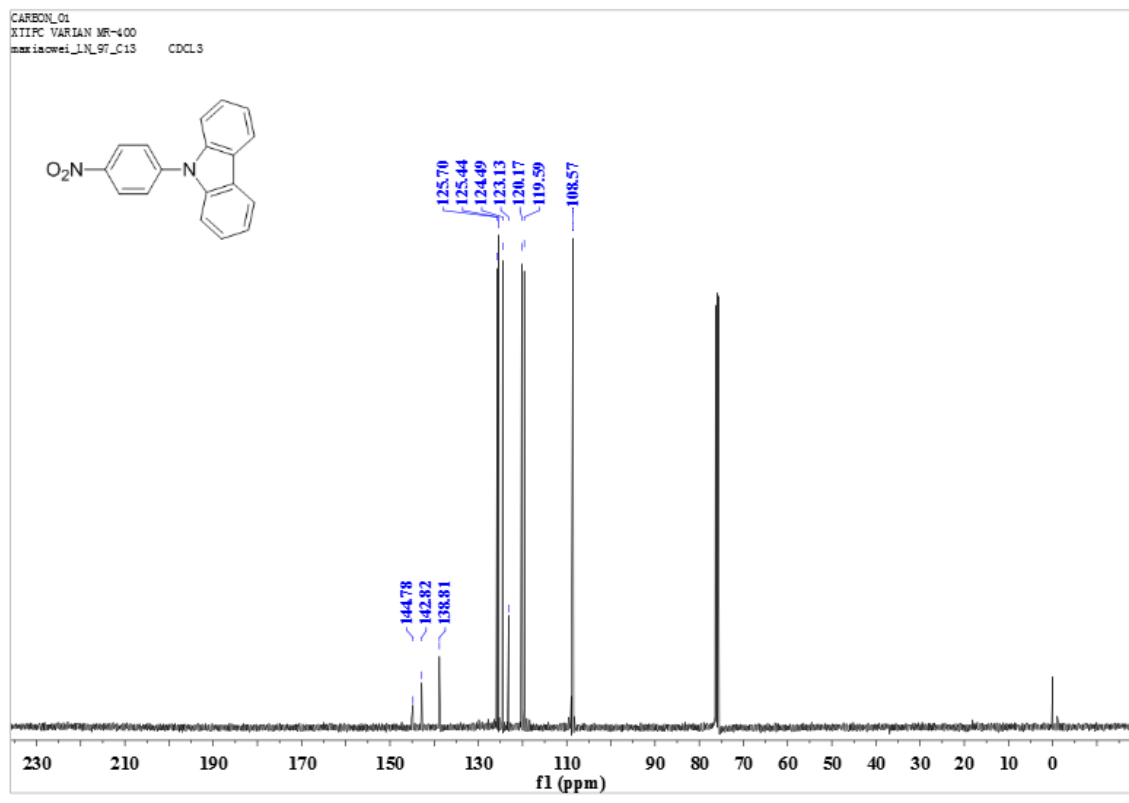

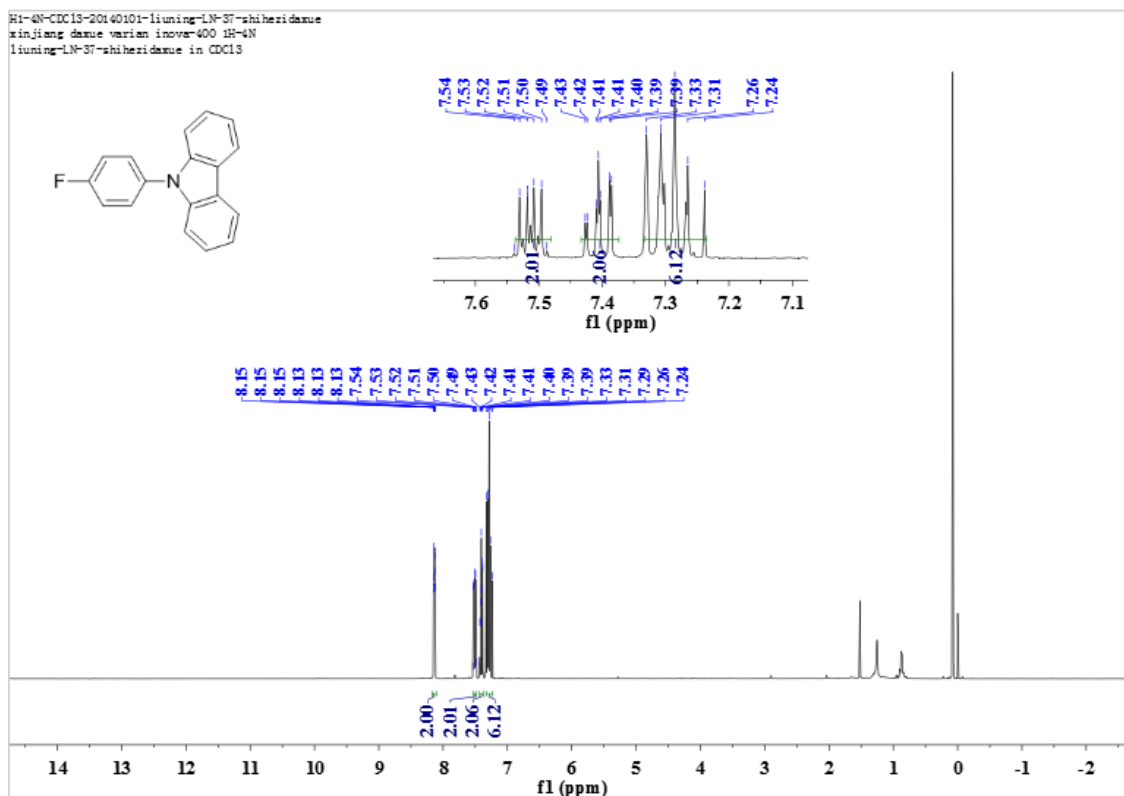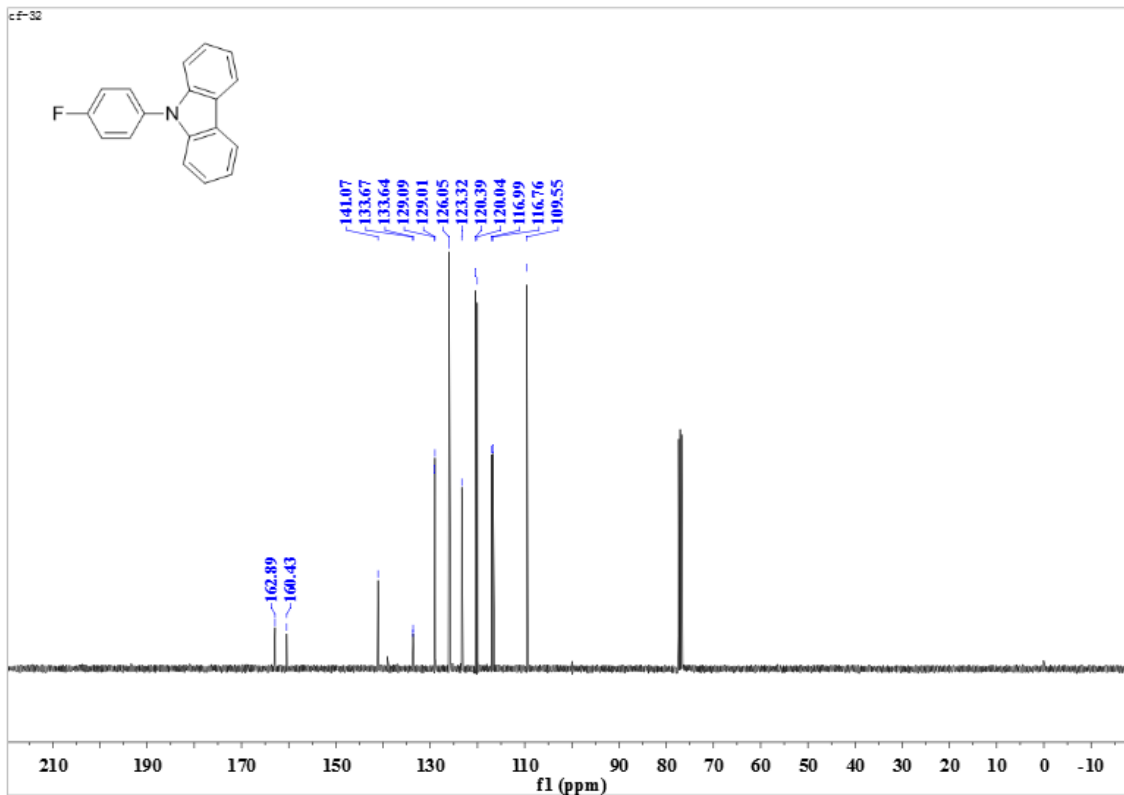

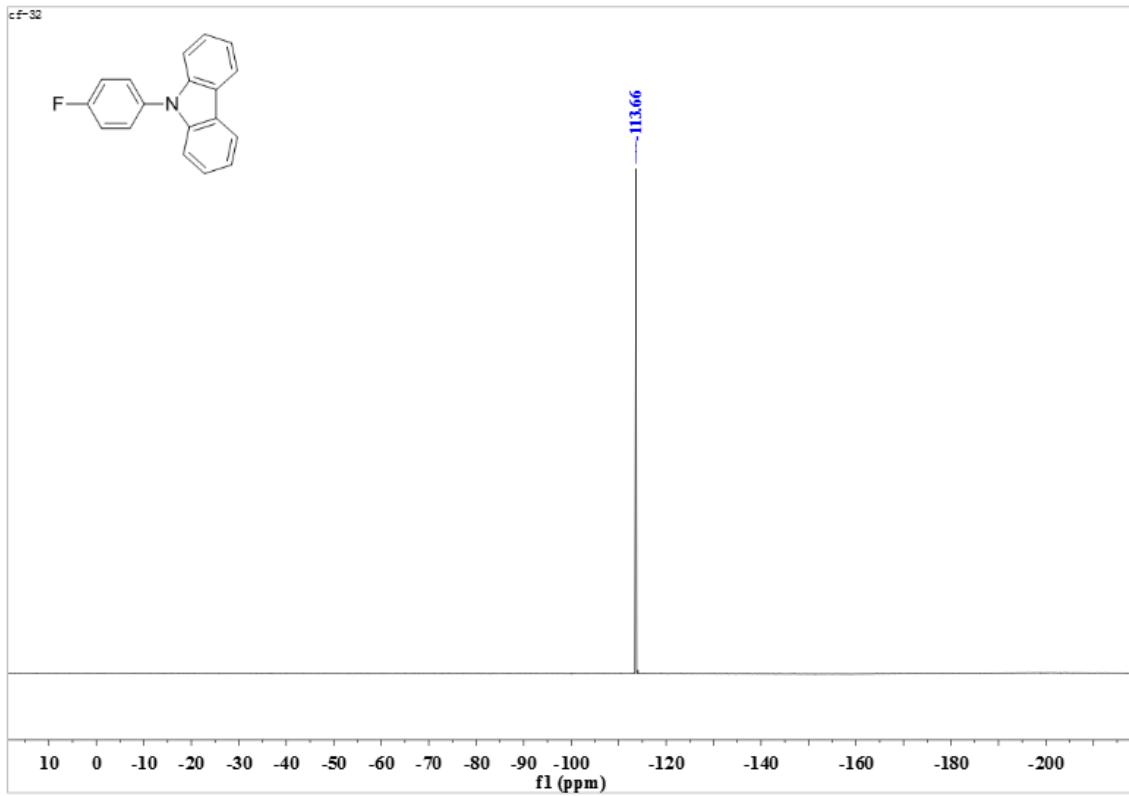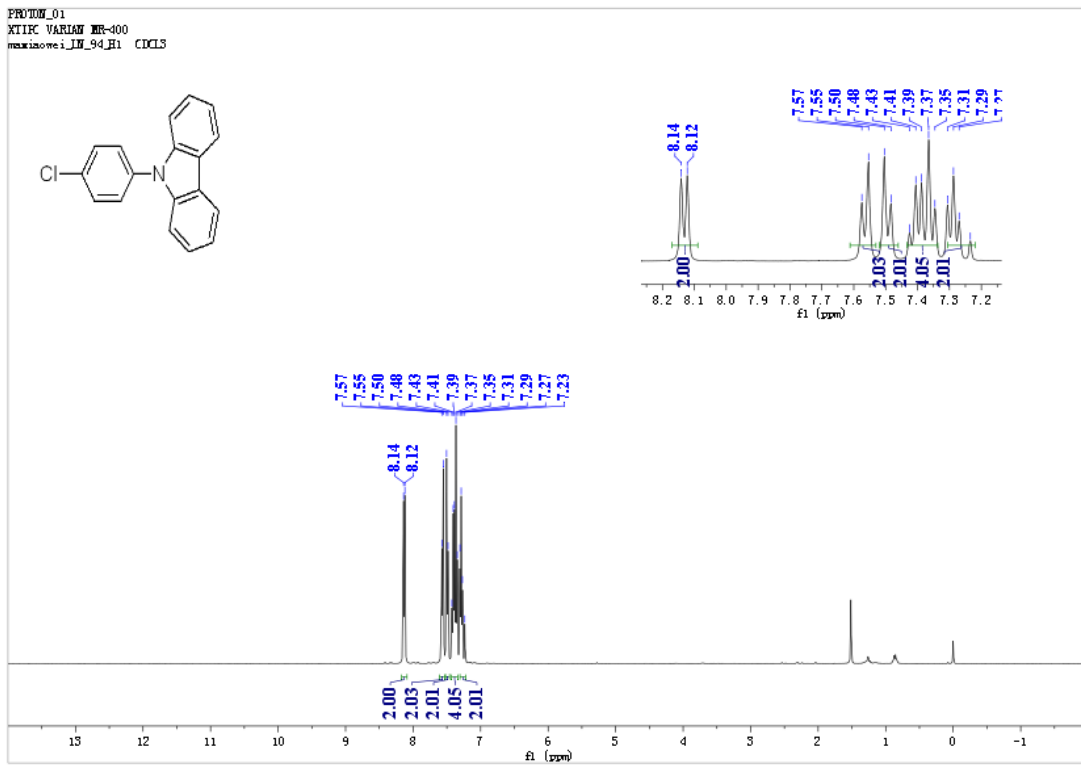

CARBON\_01  
XTEPC VARIAN MR-400  
maxiswei\_LN\_94\_f13 CDCl3

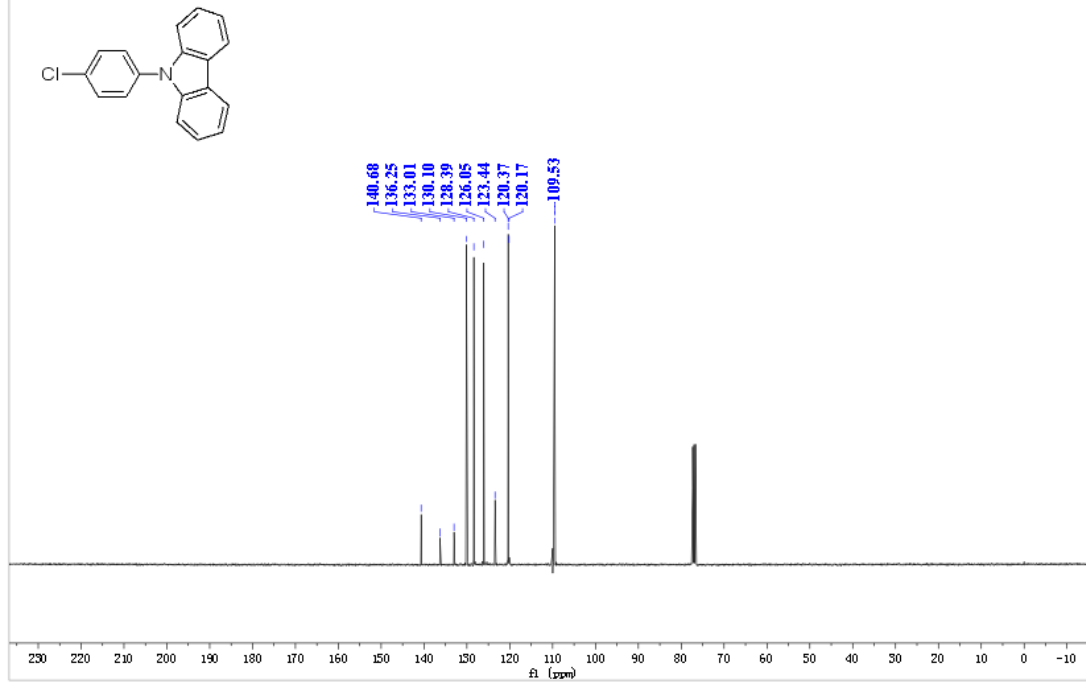

PROTON\_01  
XTEPC VARIAN NMR-400  
maxiswei\_LN\_110\_R1 CDCl3

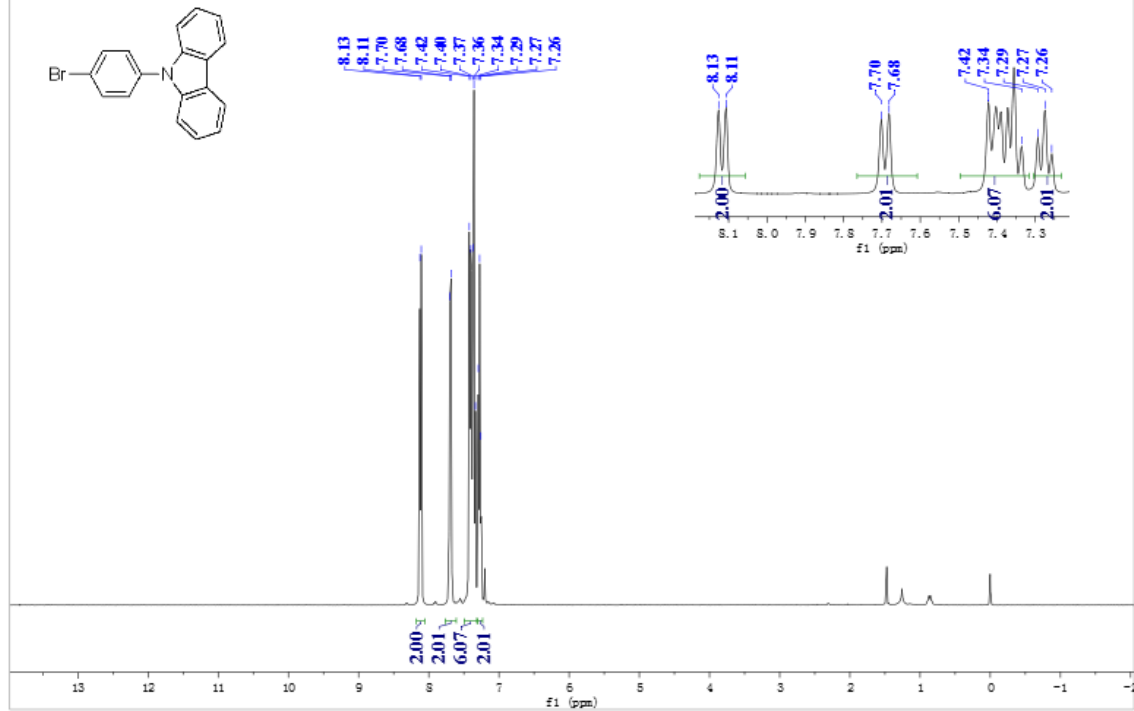

CARBON\_01  
XTIIP VARIAN MR-400  
maxinovei\_LX\_65\_C13 CDCl3

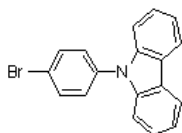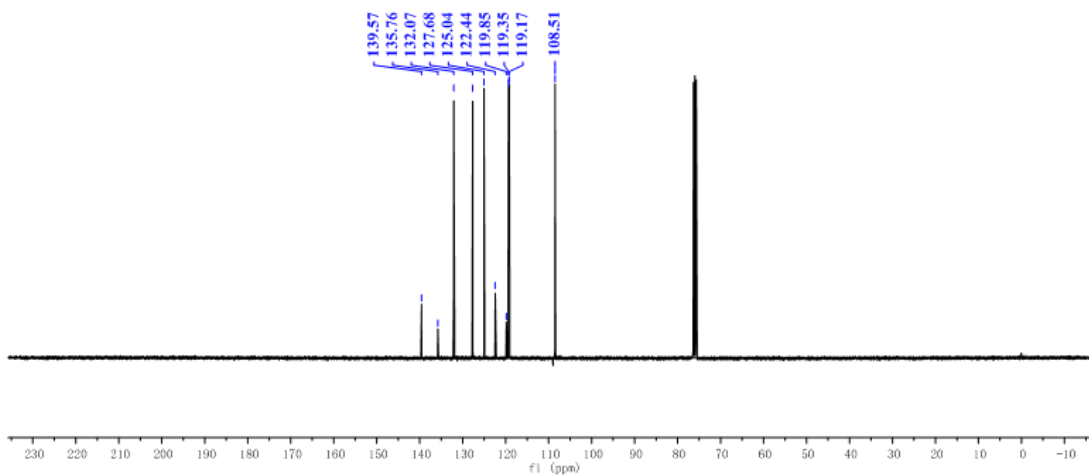

PROTON\_01  
XTIIP VARIAN MR-400  
maxinovei\_LX\_65\_H1 CDCl3

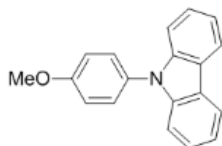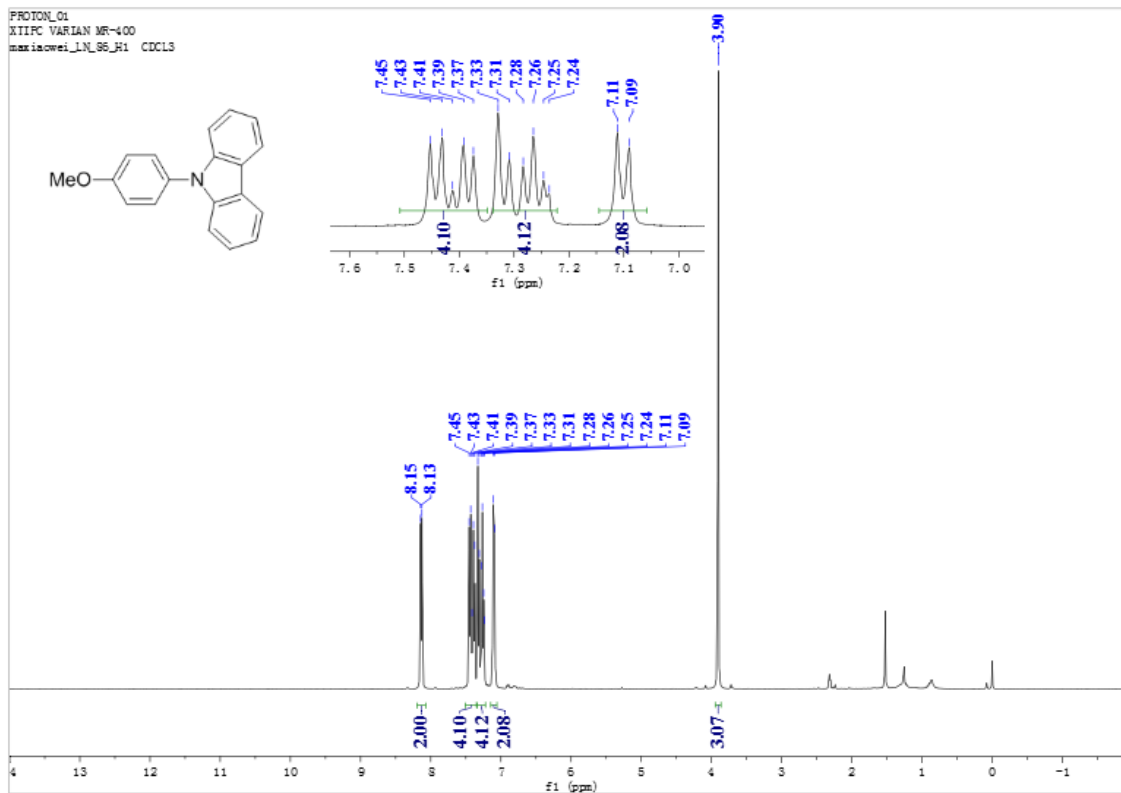

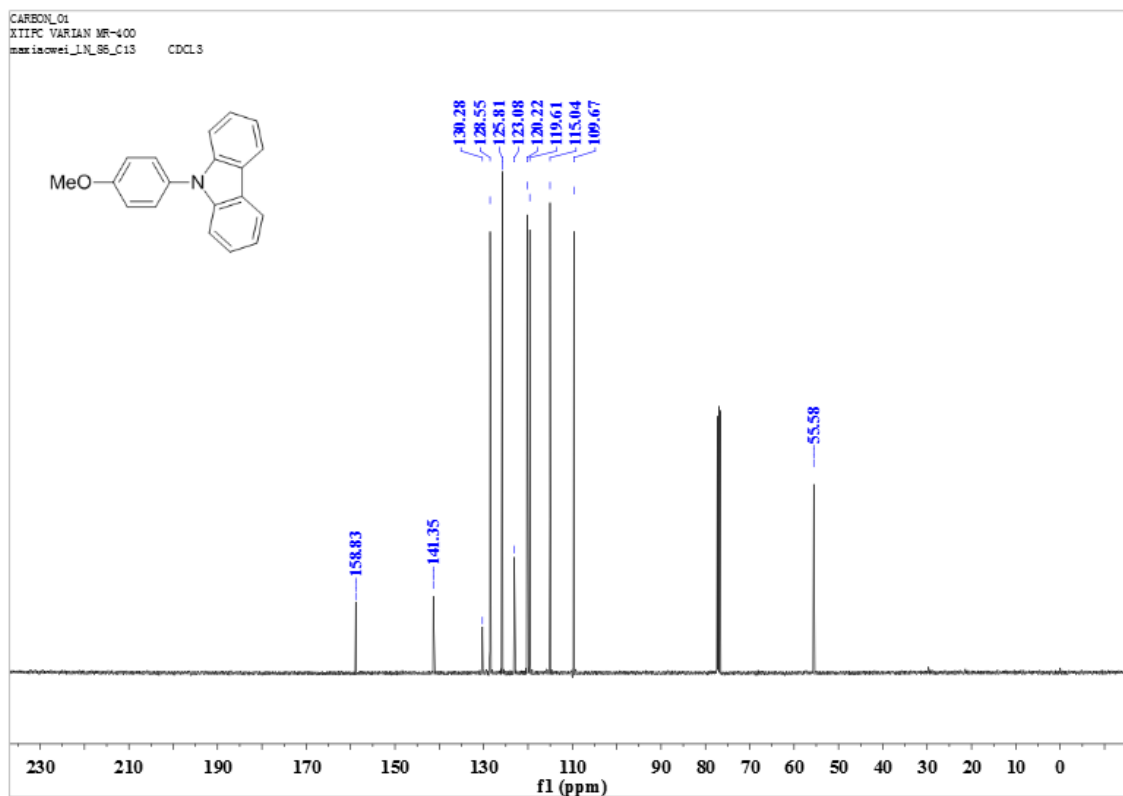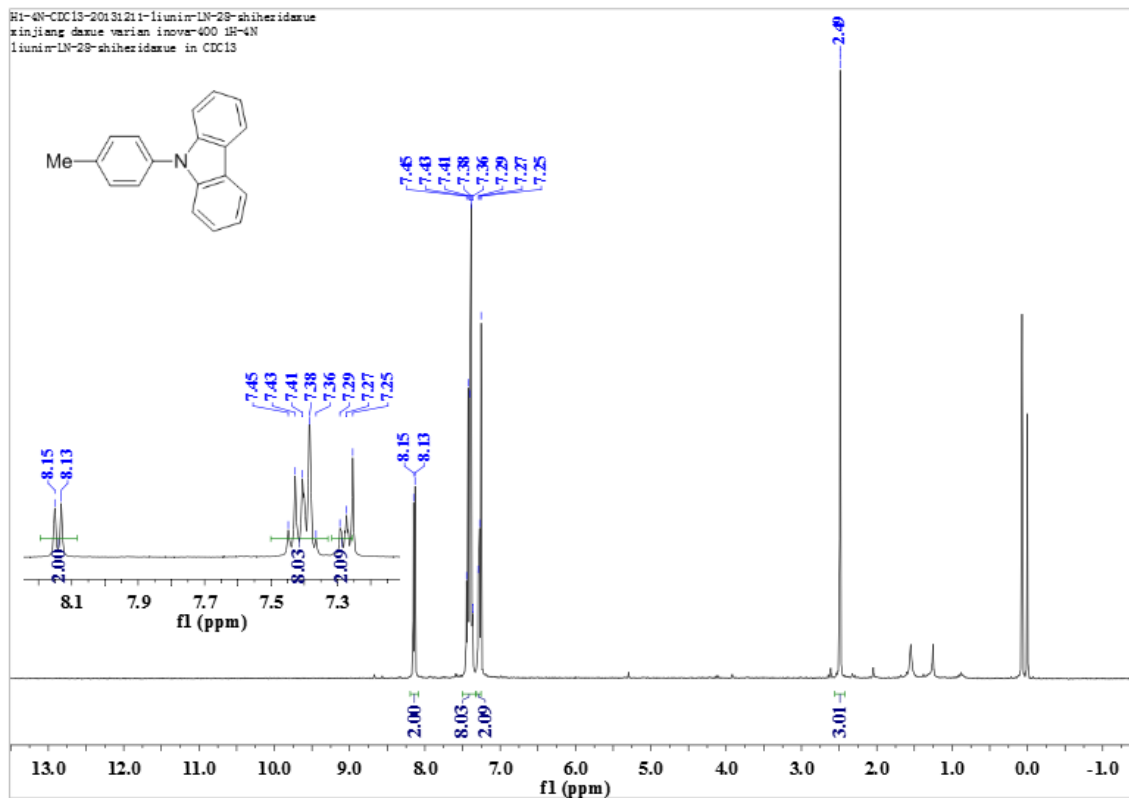



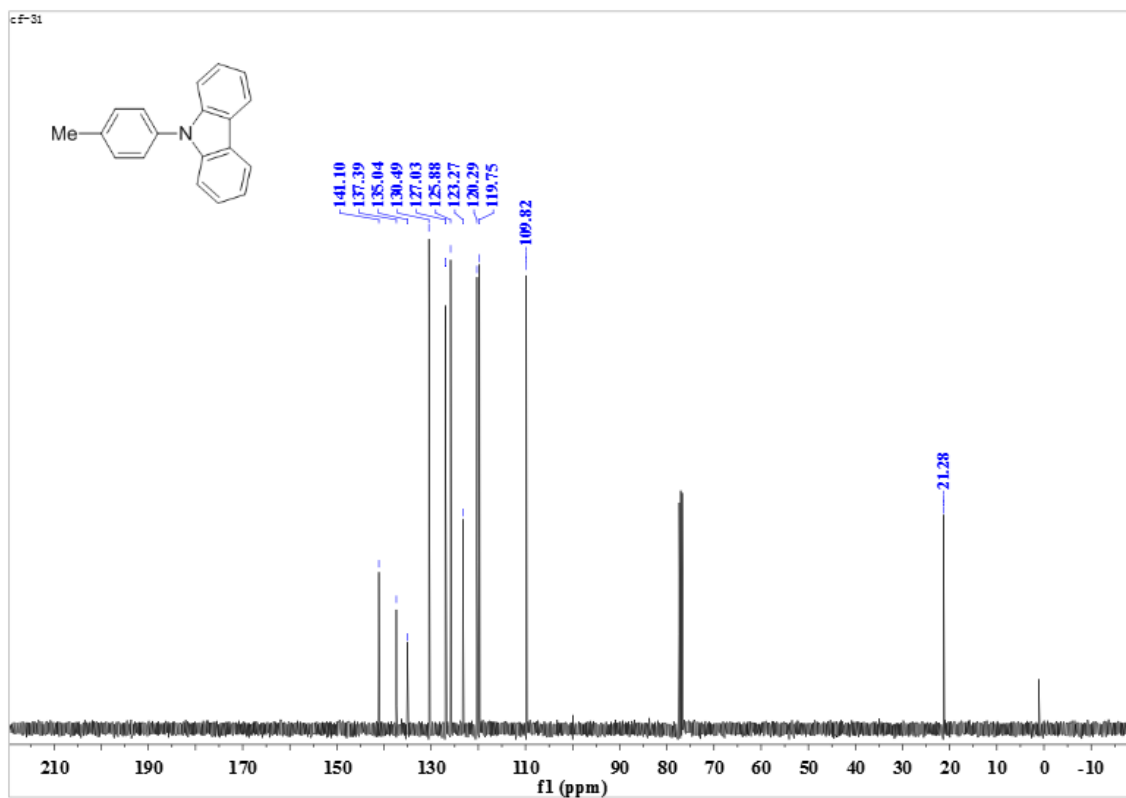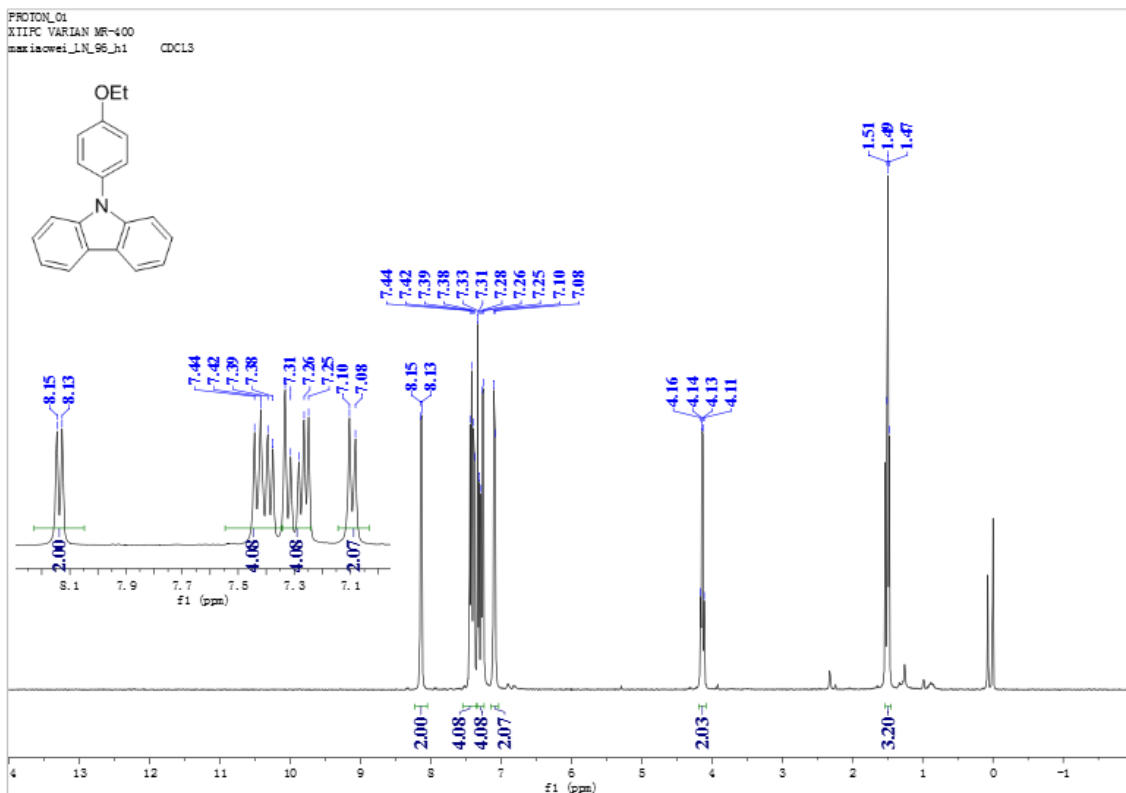

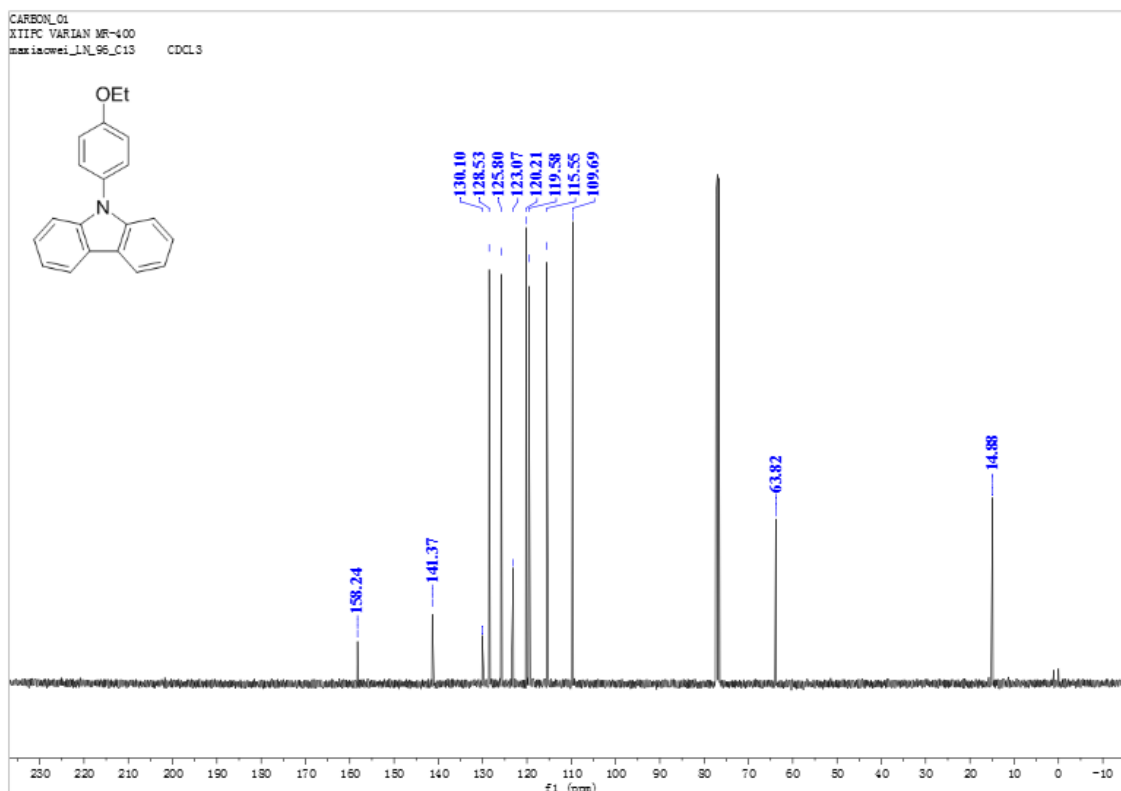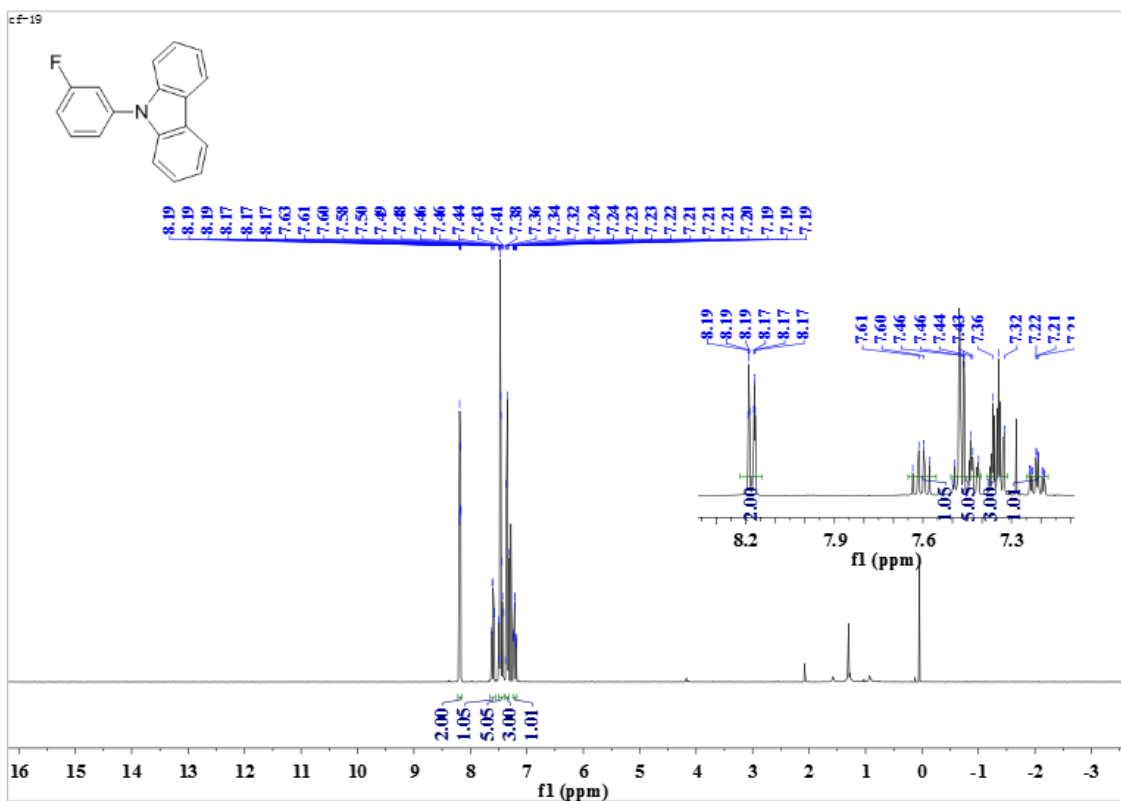

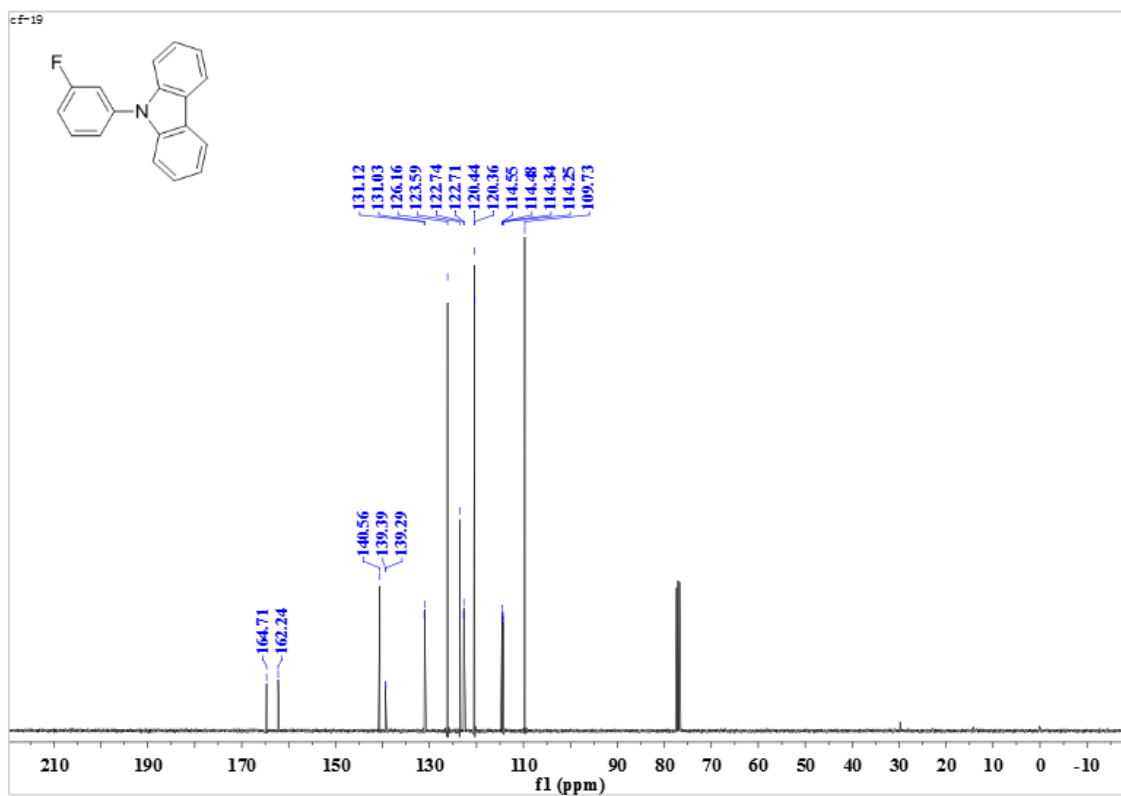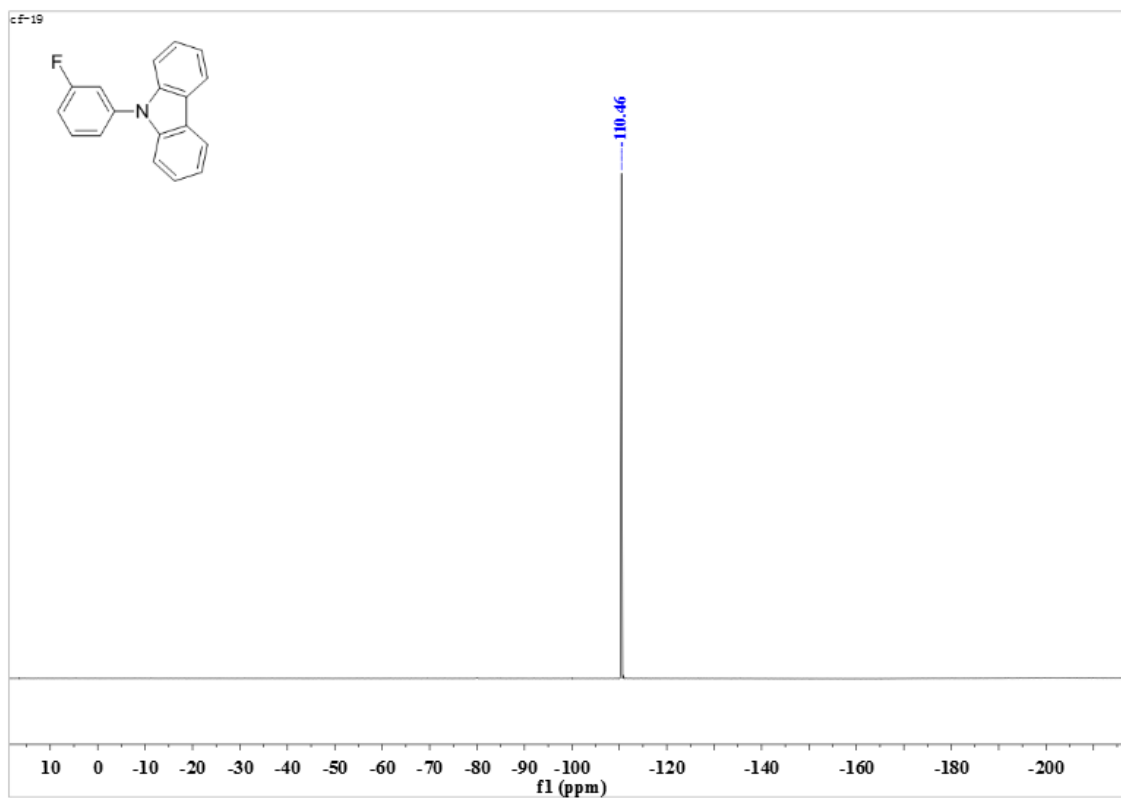

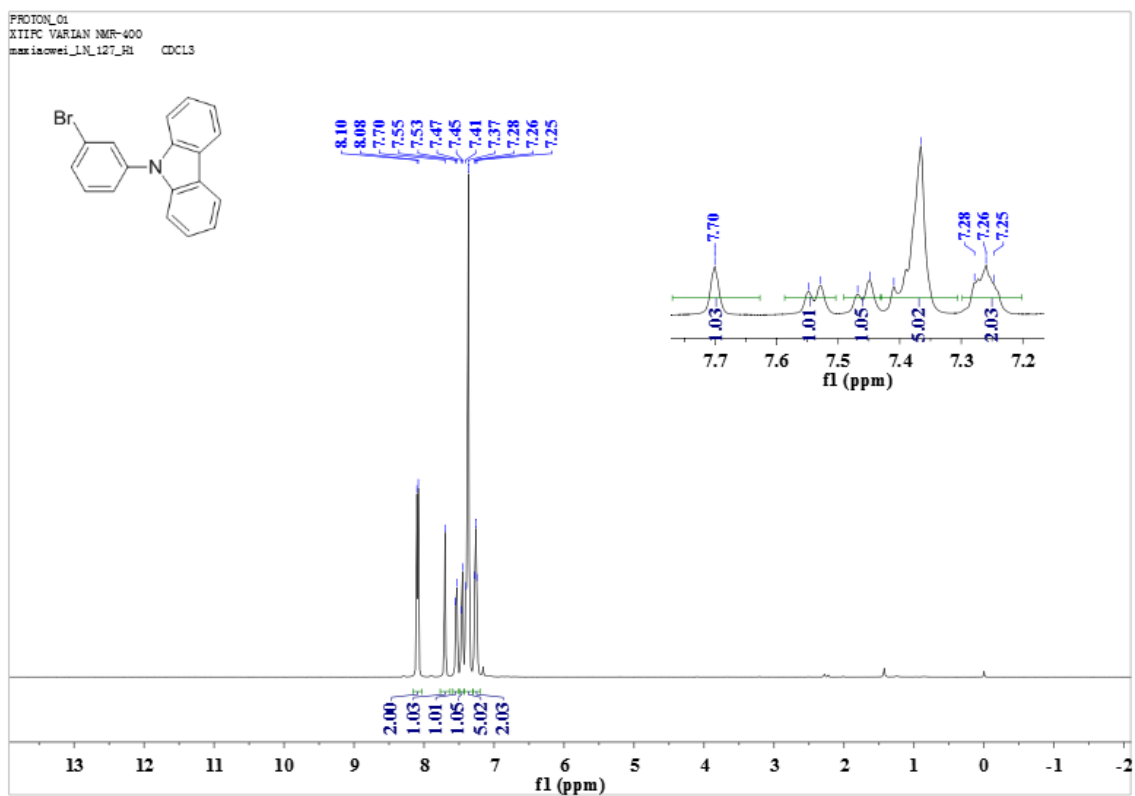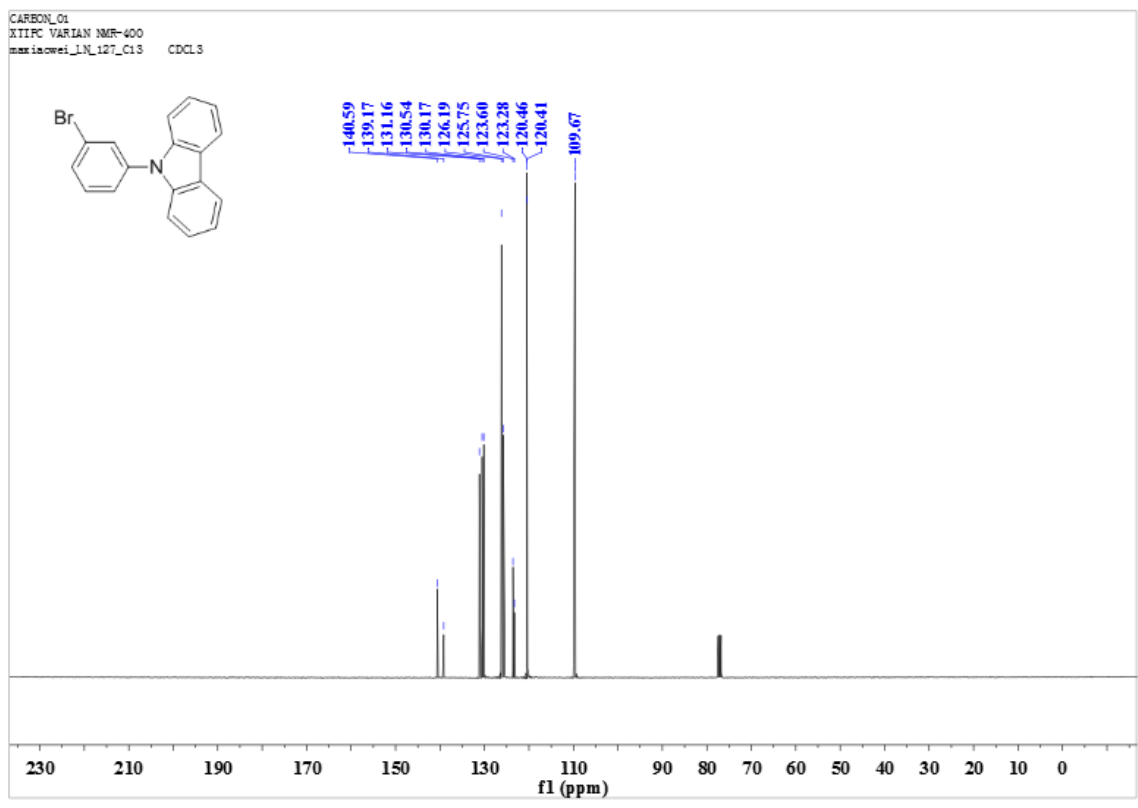

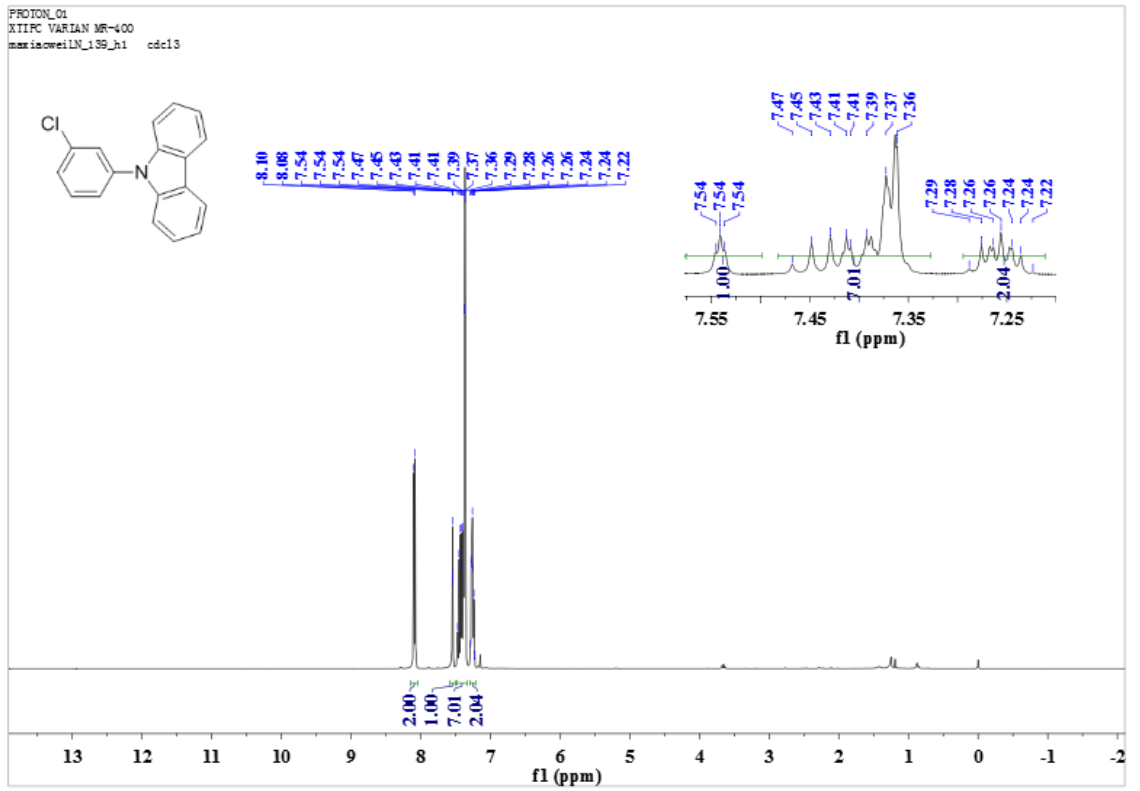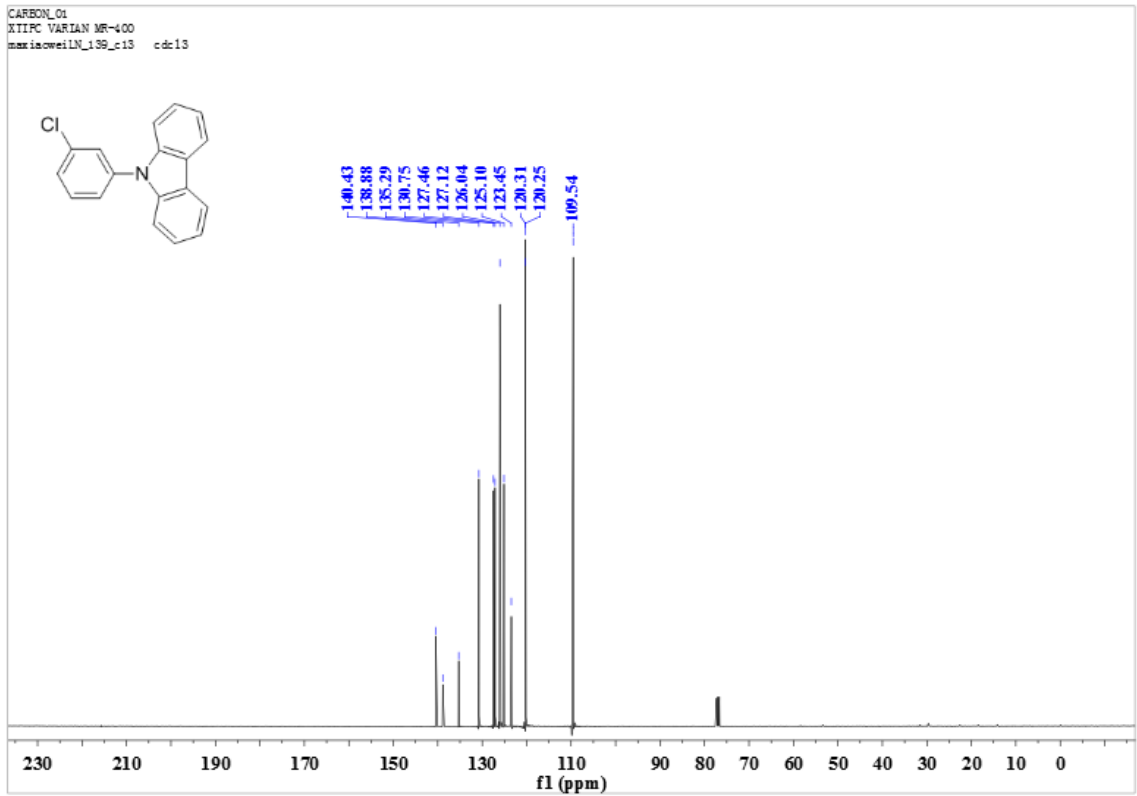

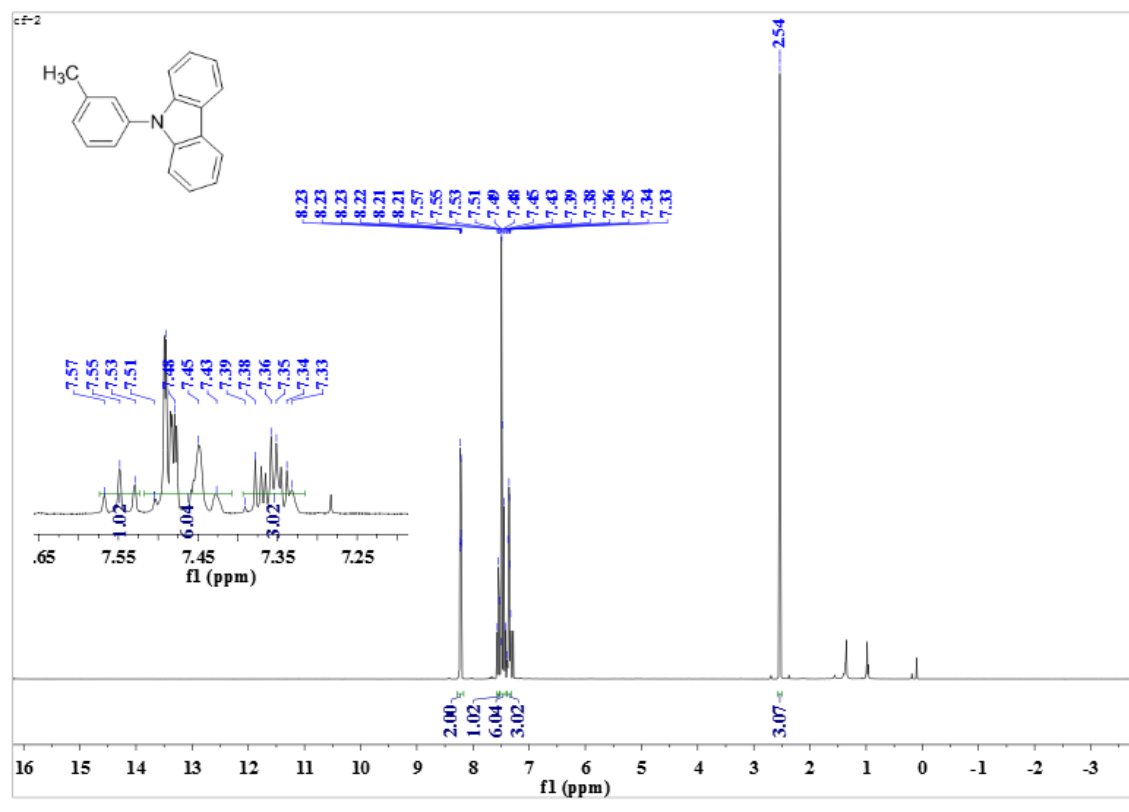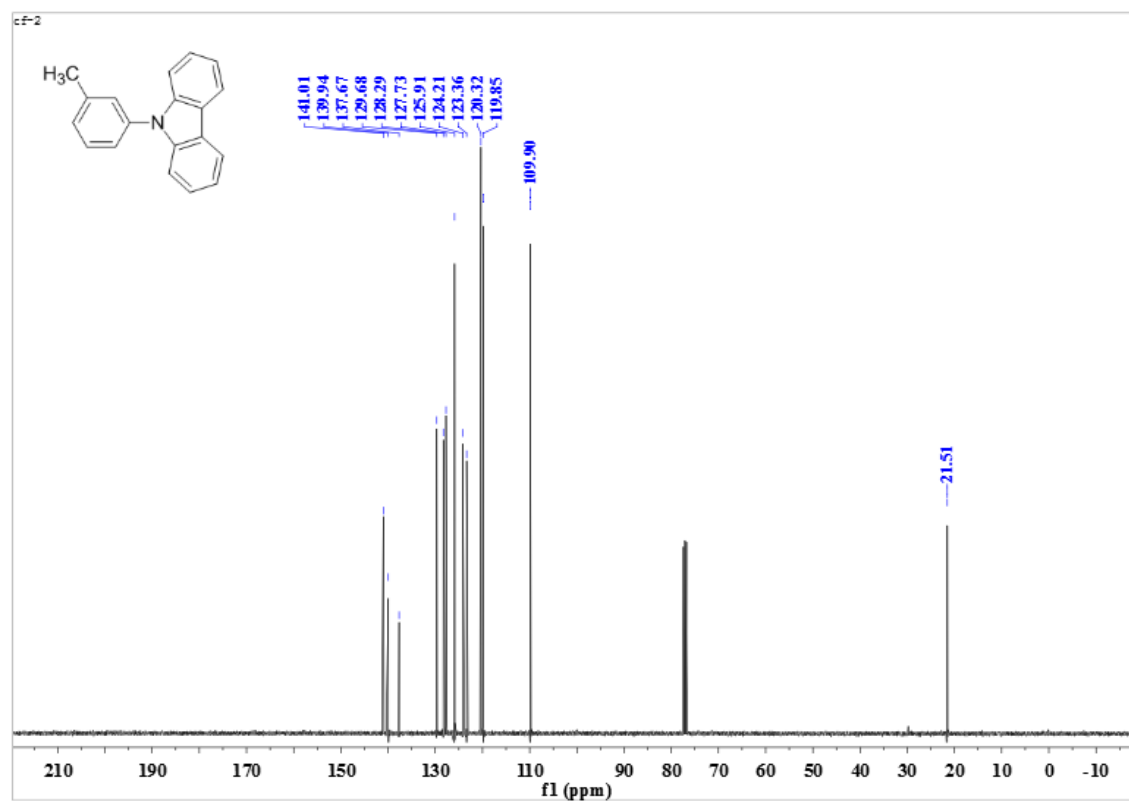



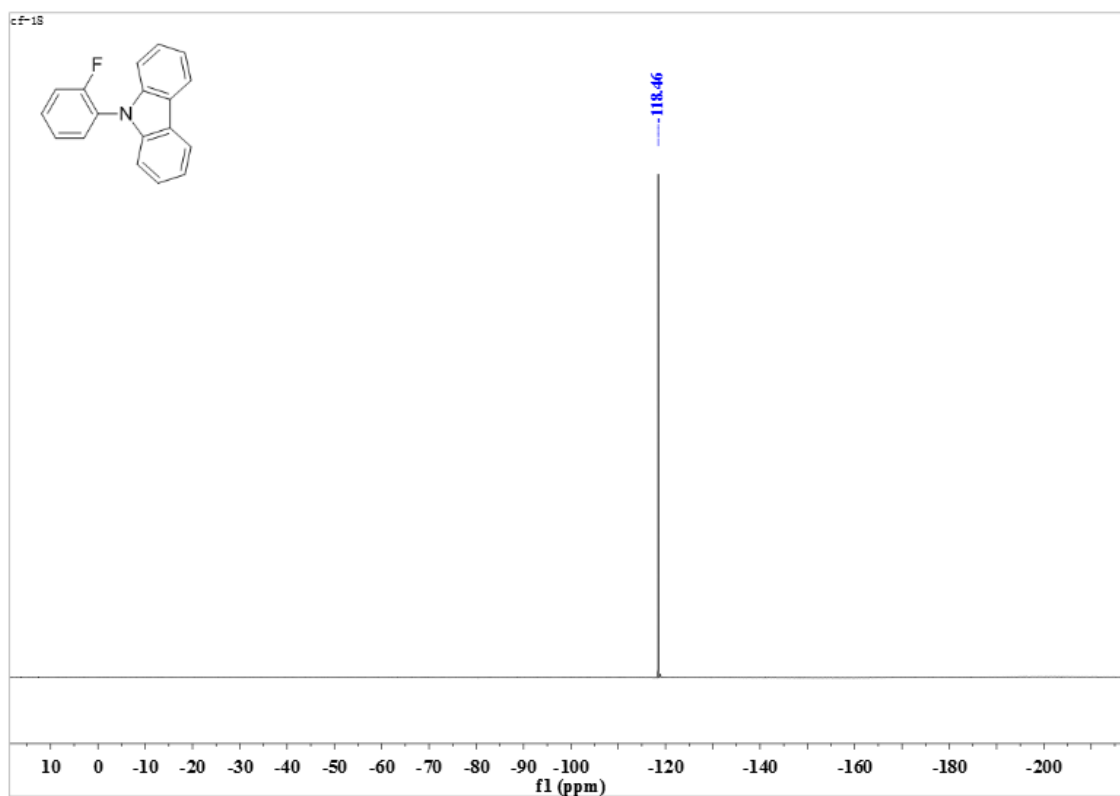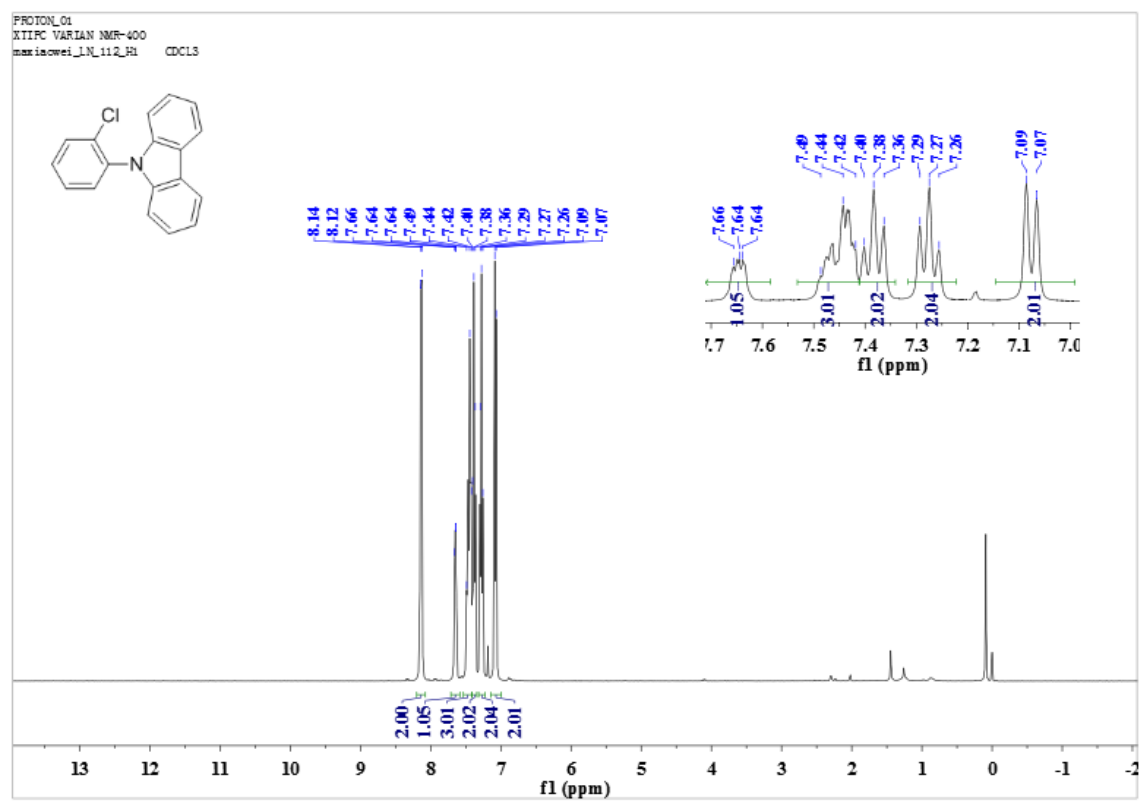



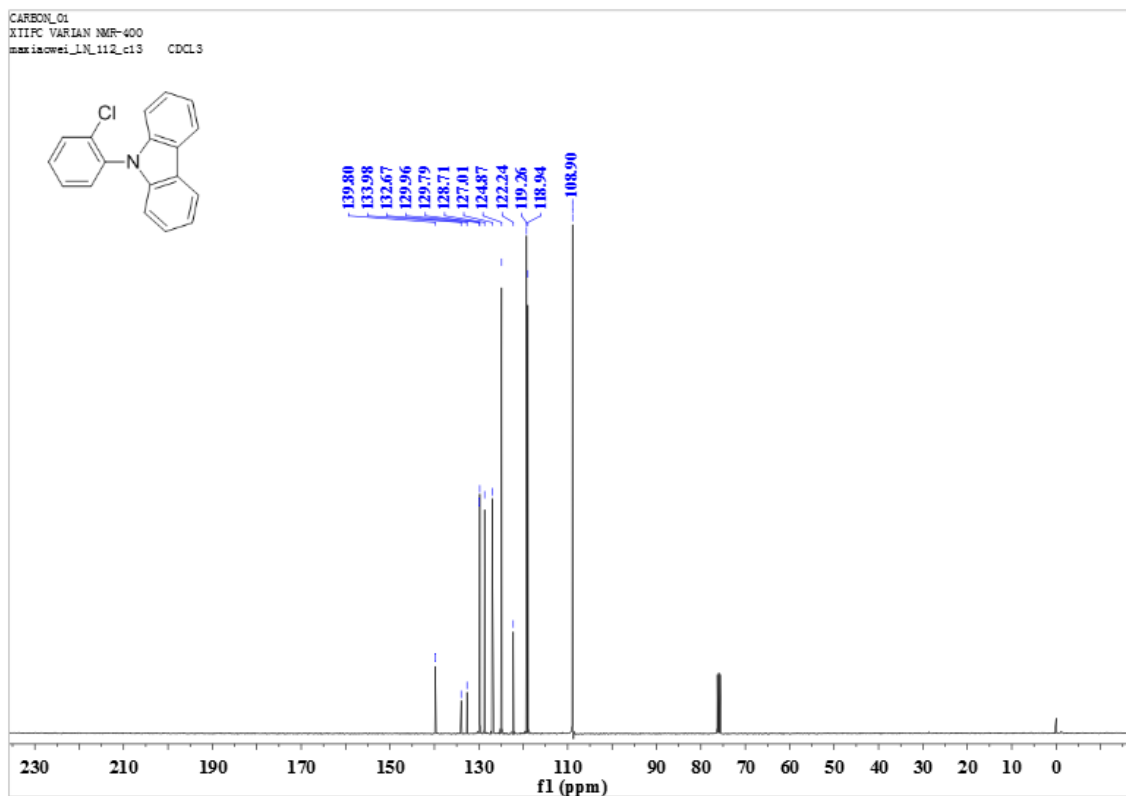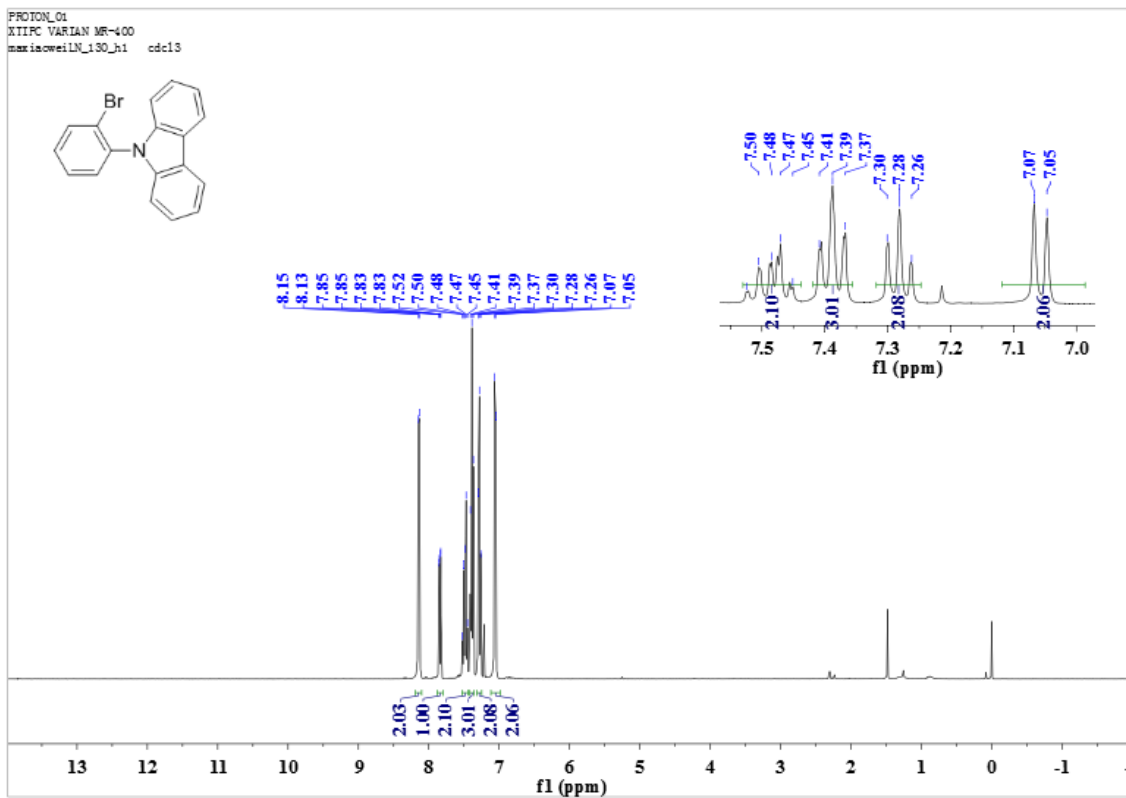

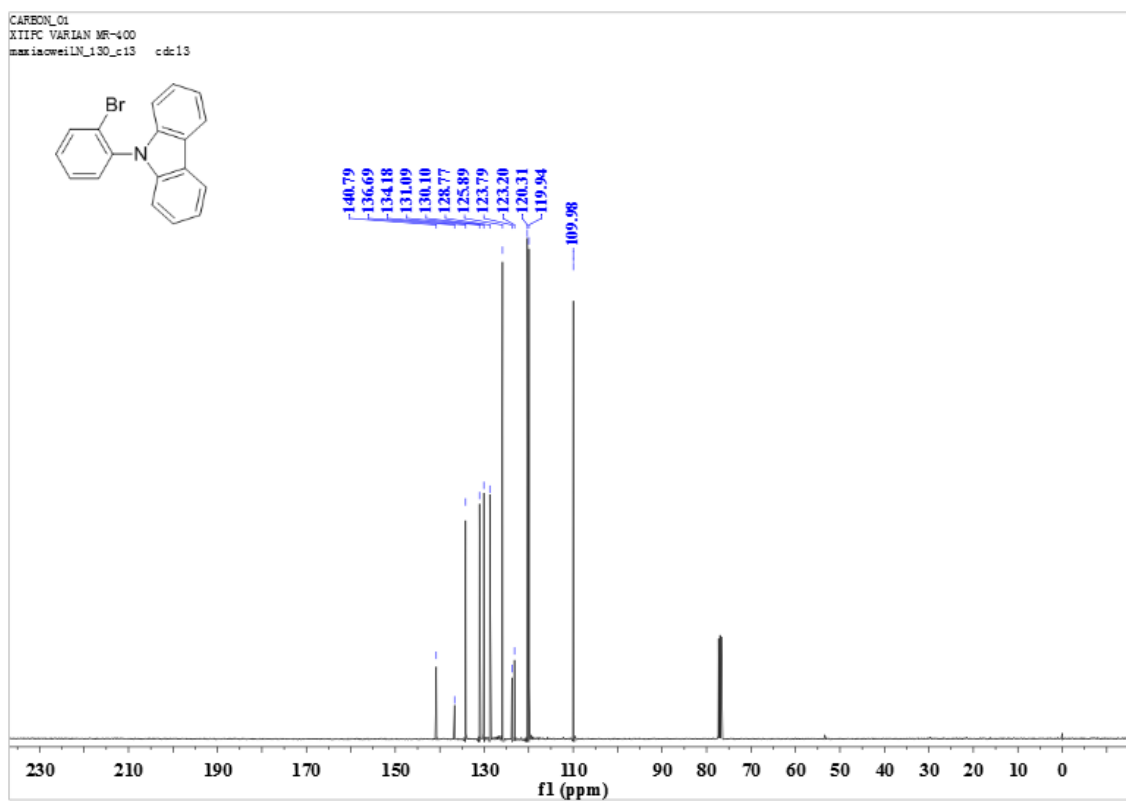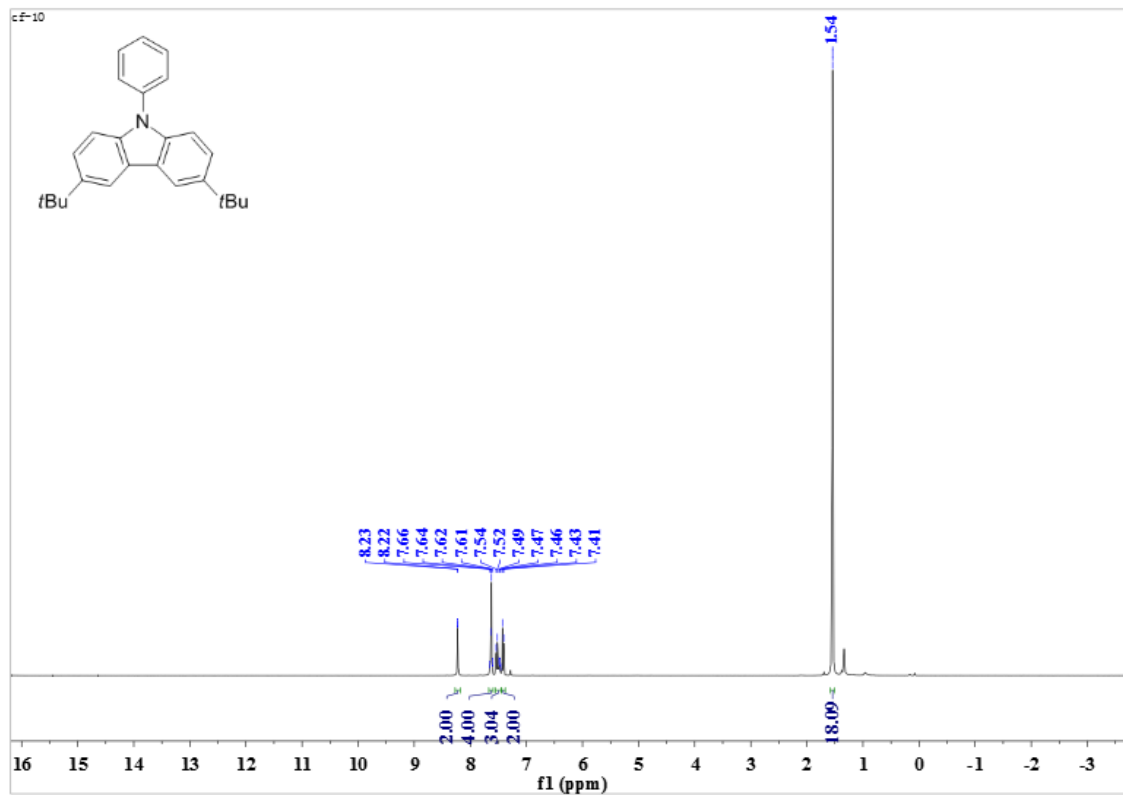

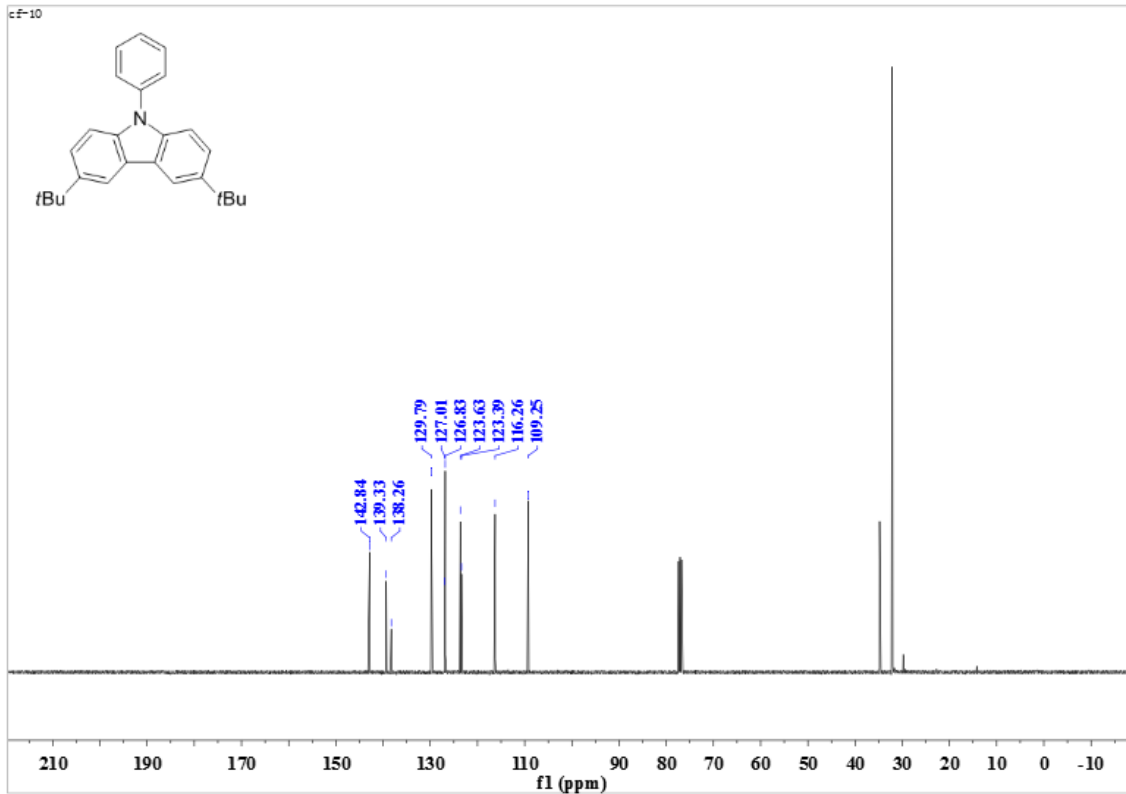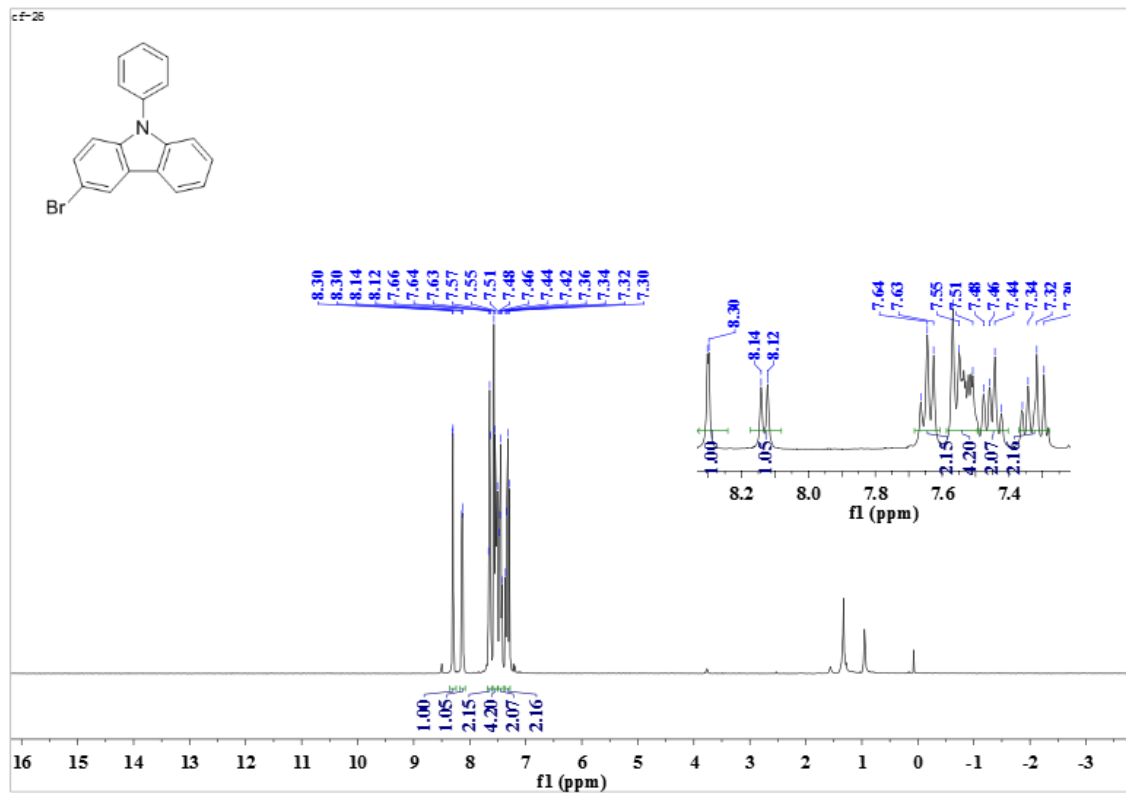

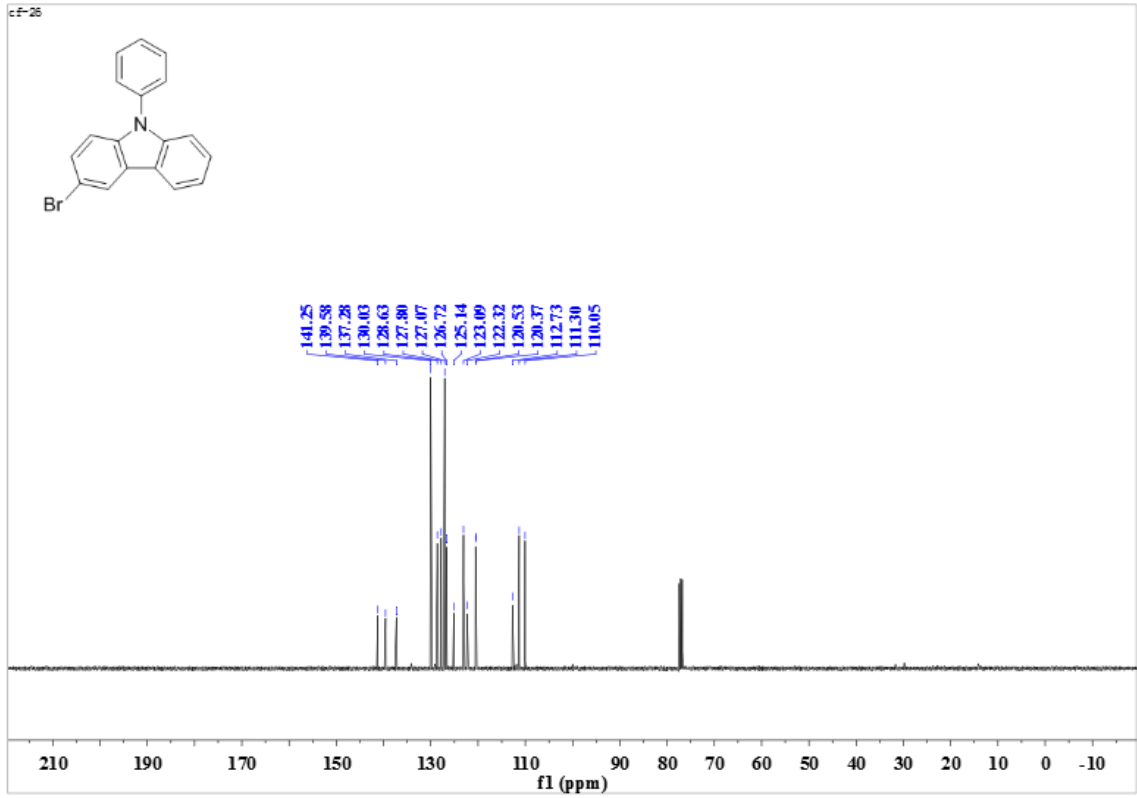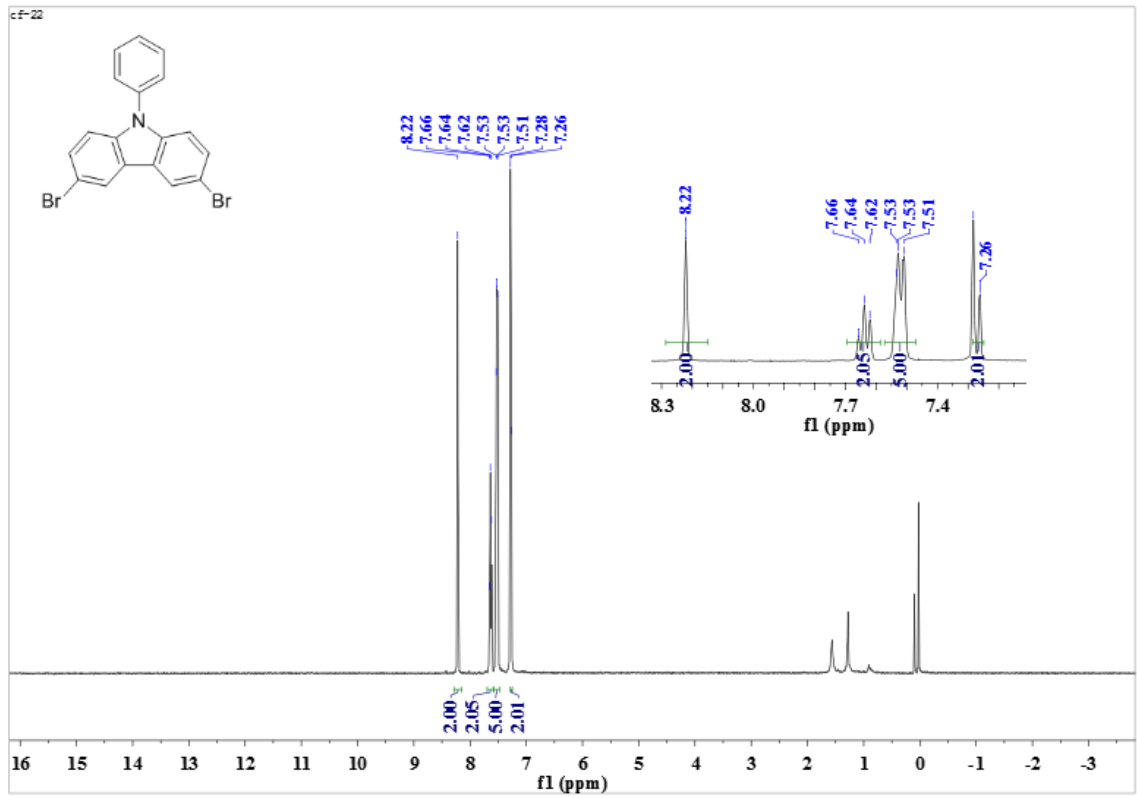

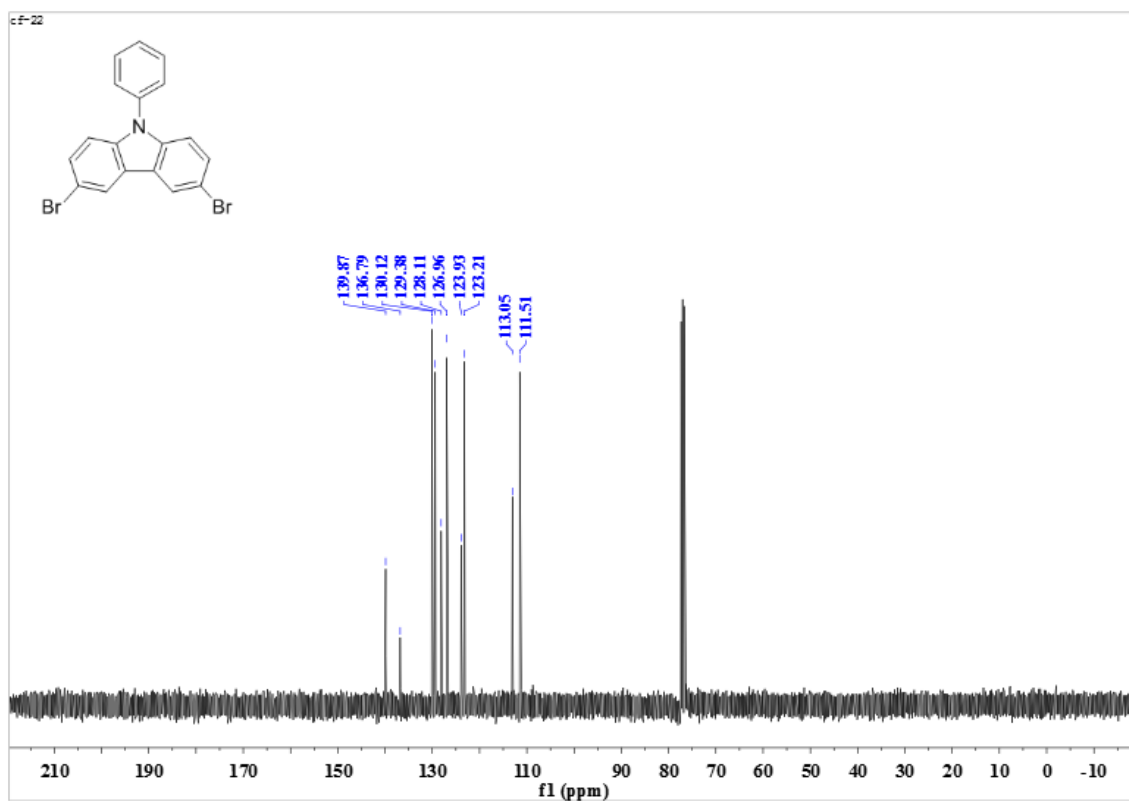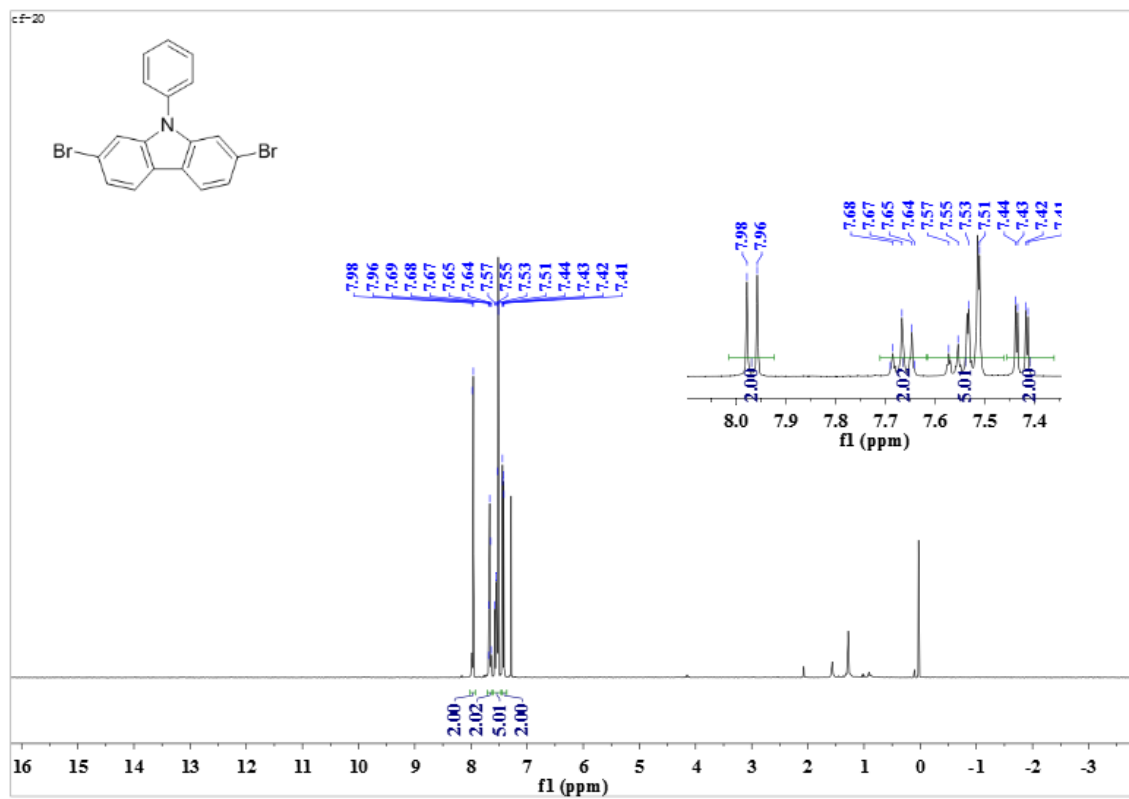

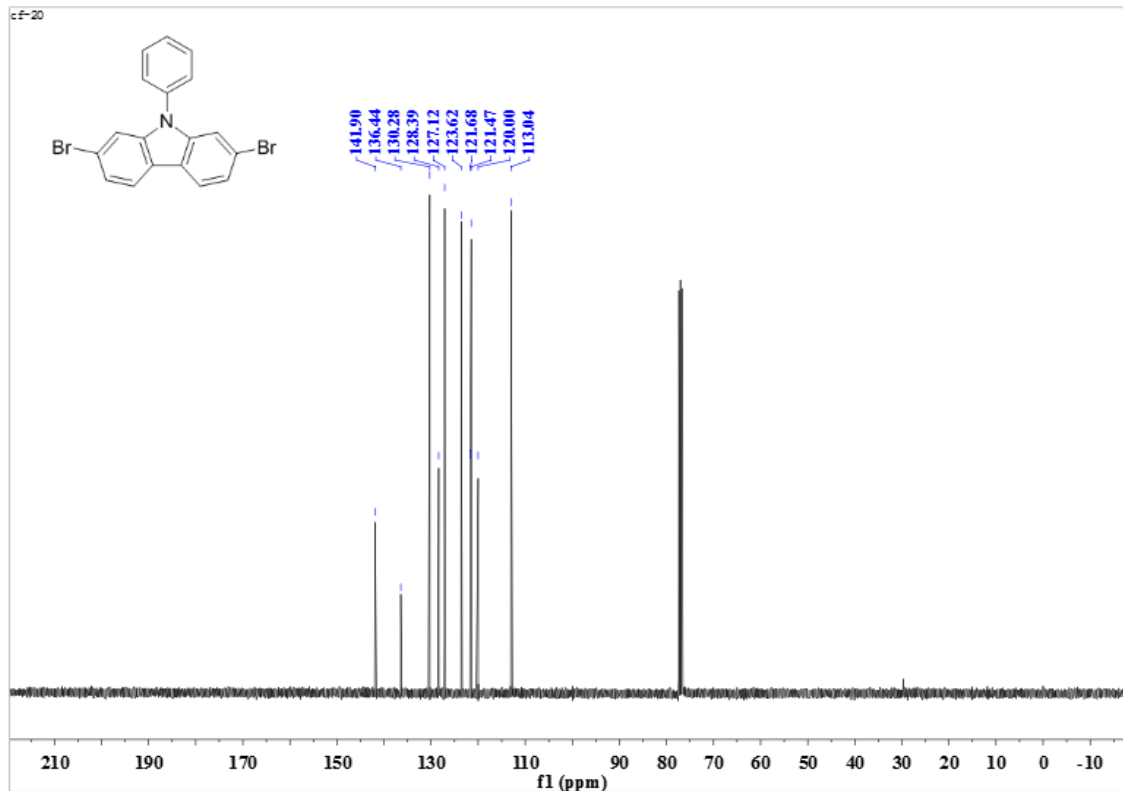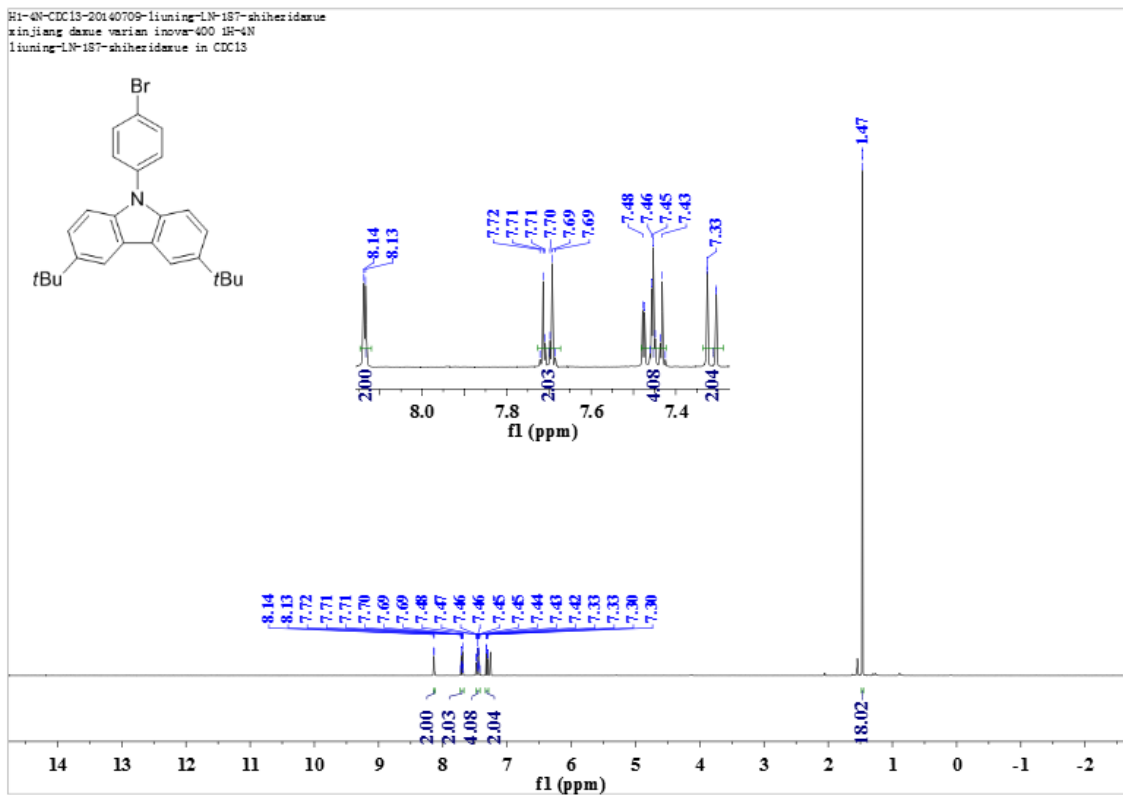

C13-4N-CDCl3-20140718-liuning-LN-187-shiheridaxue  
 xinjiang daxue varian innova-400 13C-4N  
 liuning-LN-187-shiheridaxue  
 in CDCl3

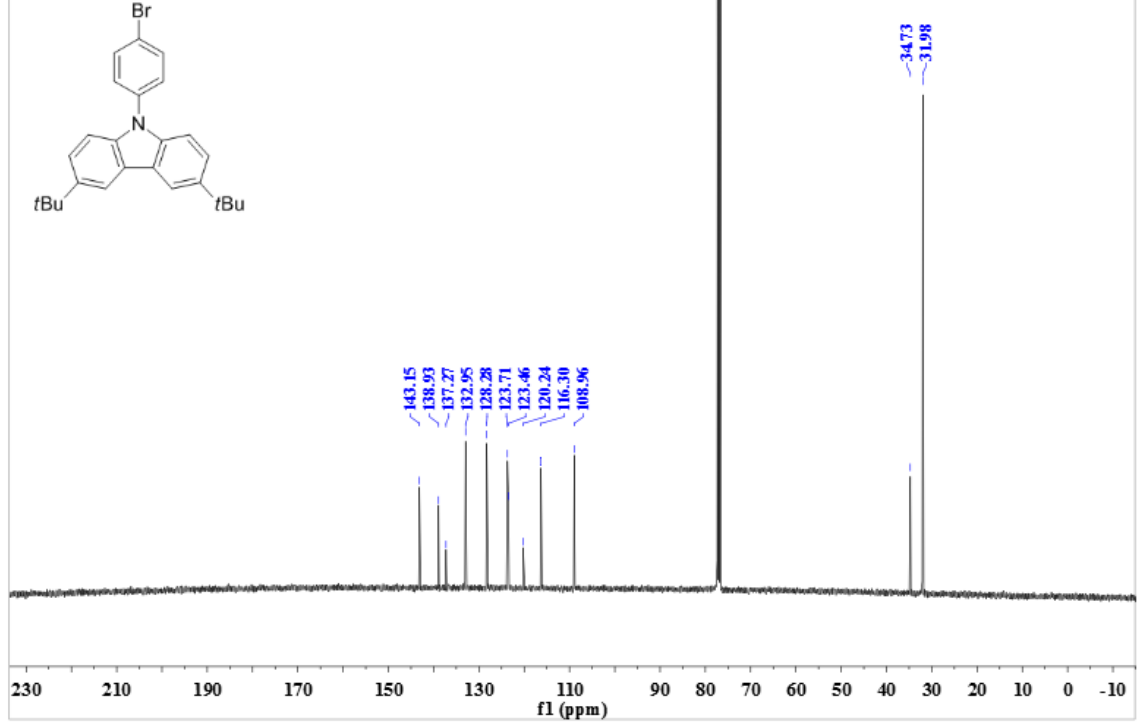

PROTON\_01  
 XIIFC VARIAN MR-400  
 maxiaowei\_LN\_90\_H1 CDCl3

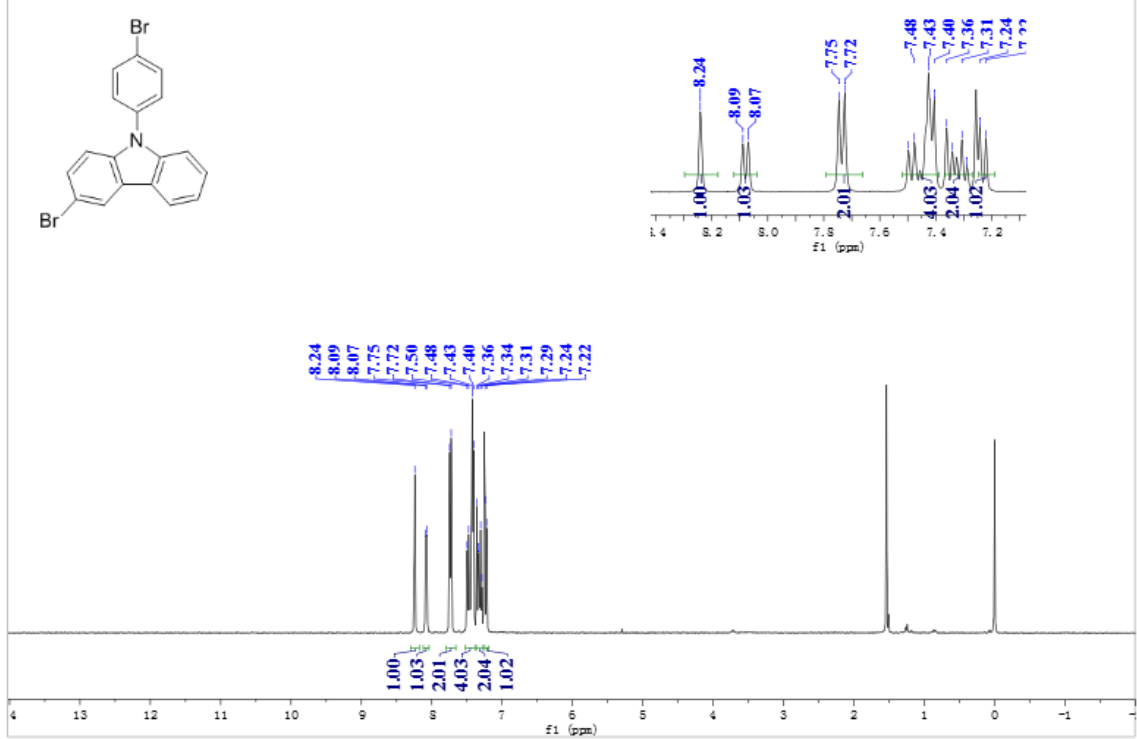

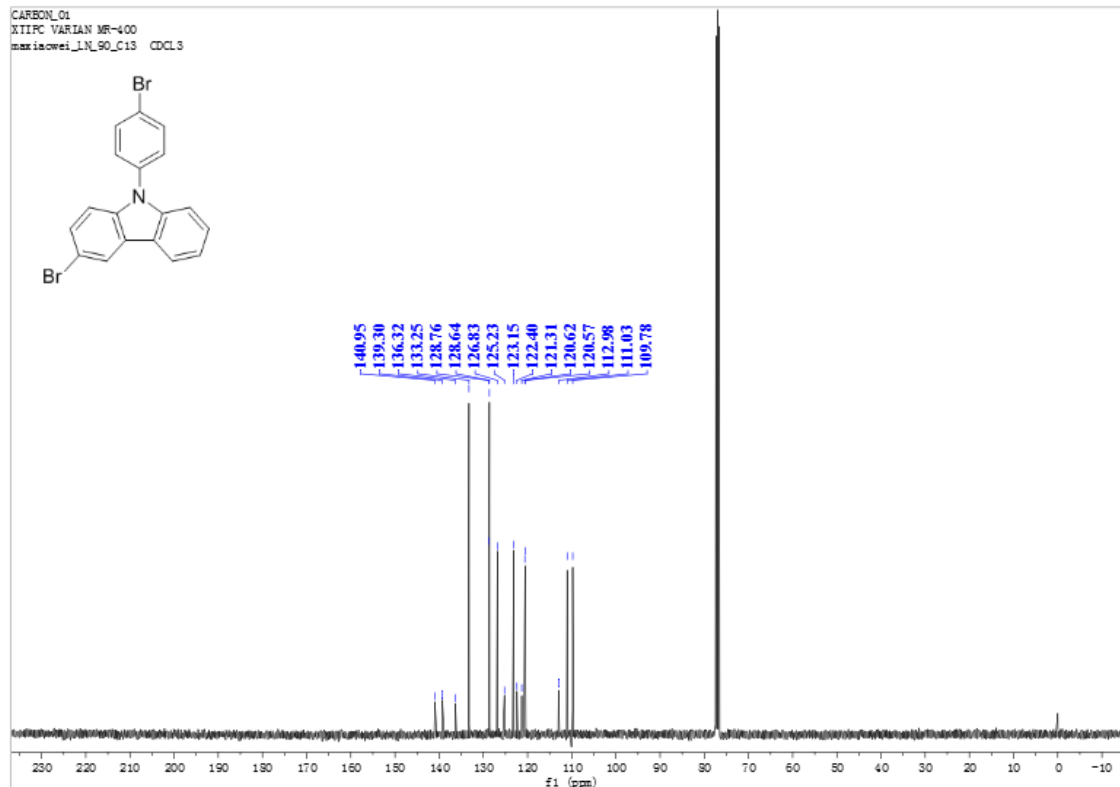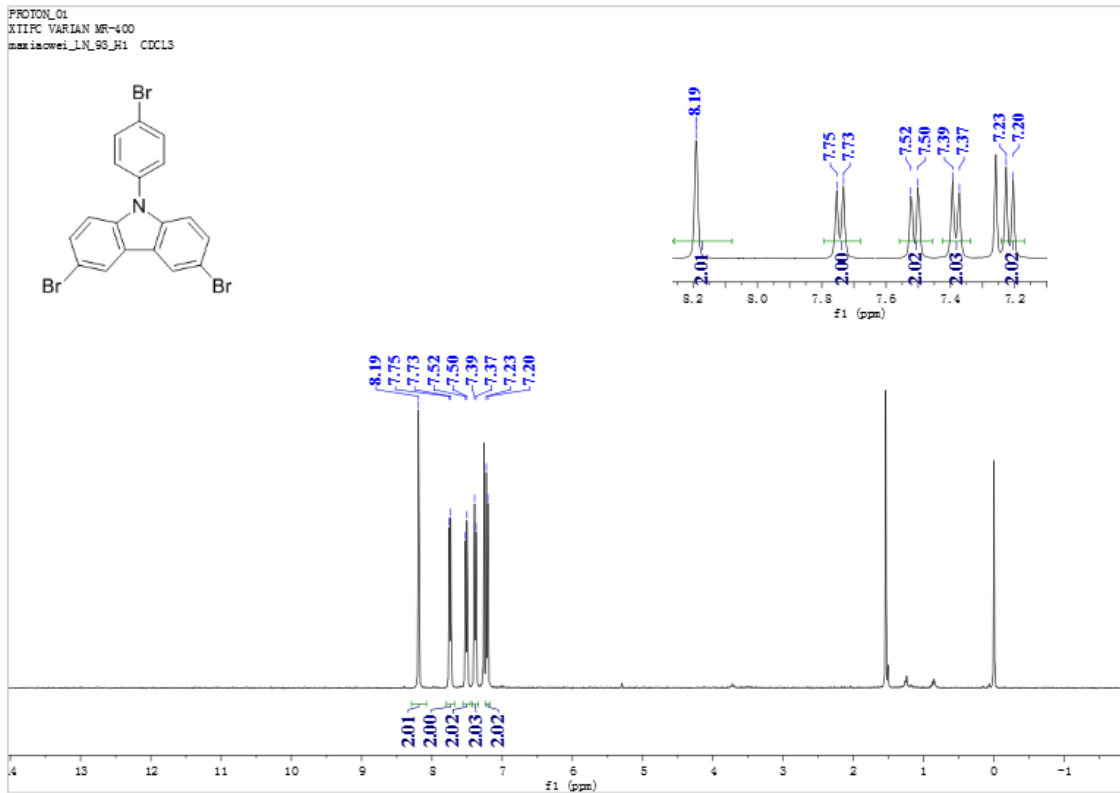



CARBON\_01  
XIIPC VARIAN MR-400  
maxiacwei\_1N\_93\_C13 CDCl3

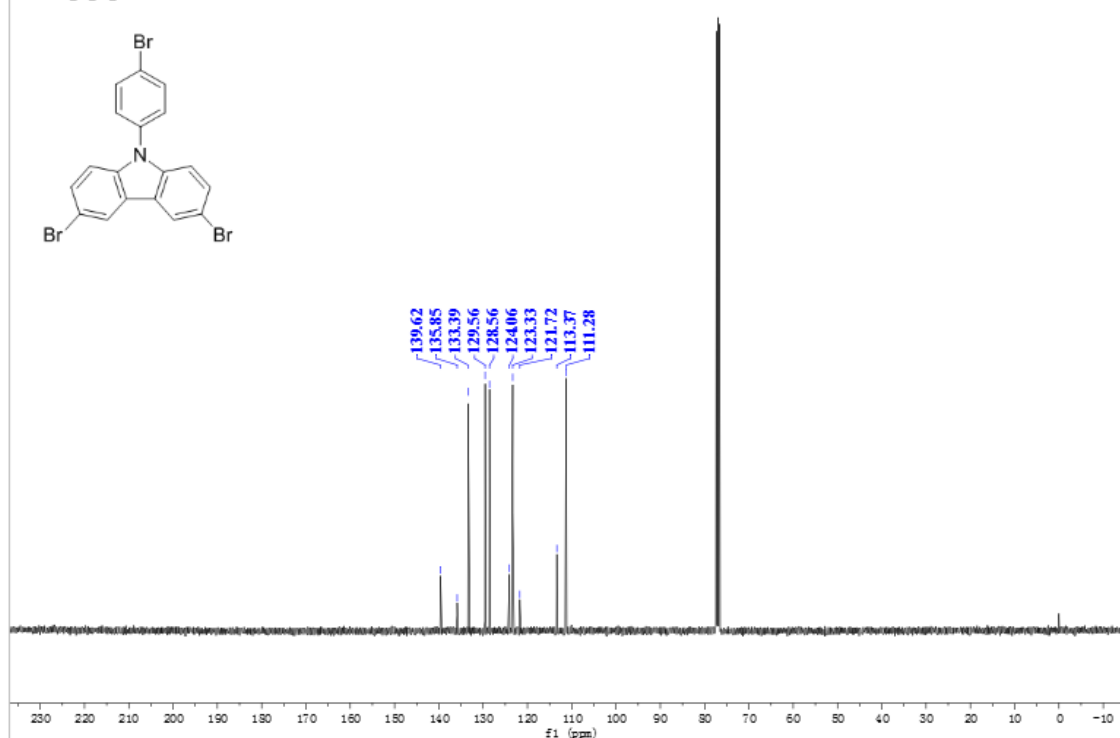

PROTON\_01  
XIIPC VARIAN MR-400  
maxiacwei\_1N\_87\_H1 CDCl3

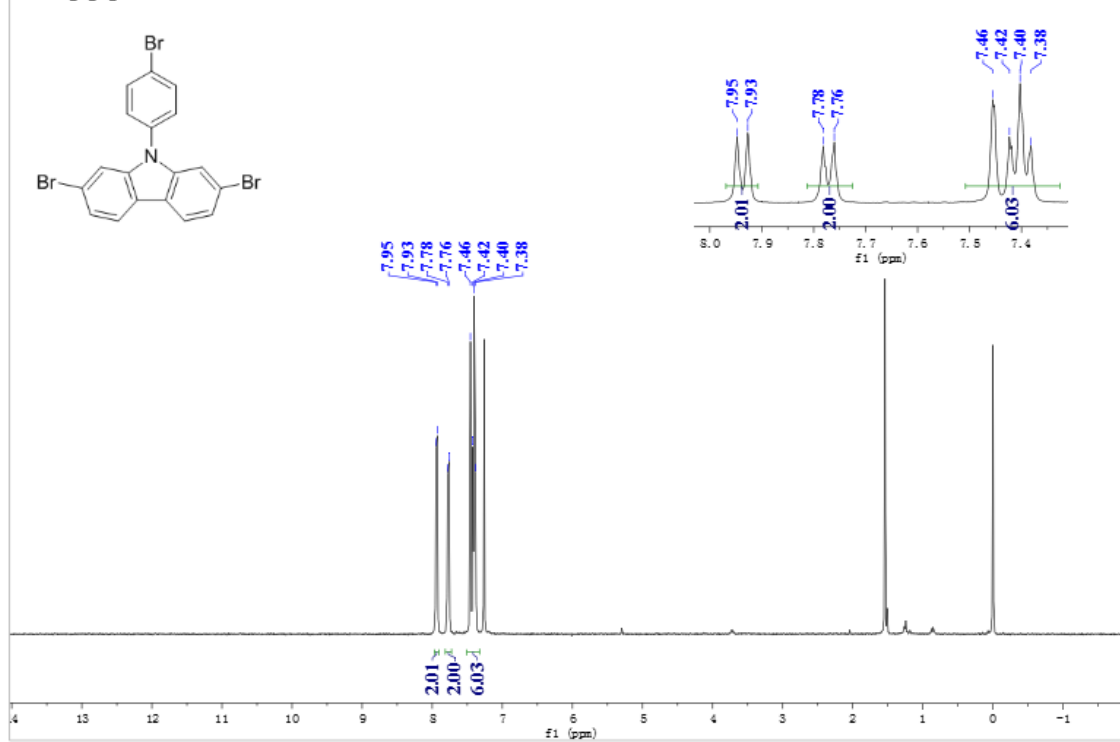

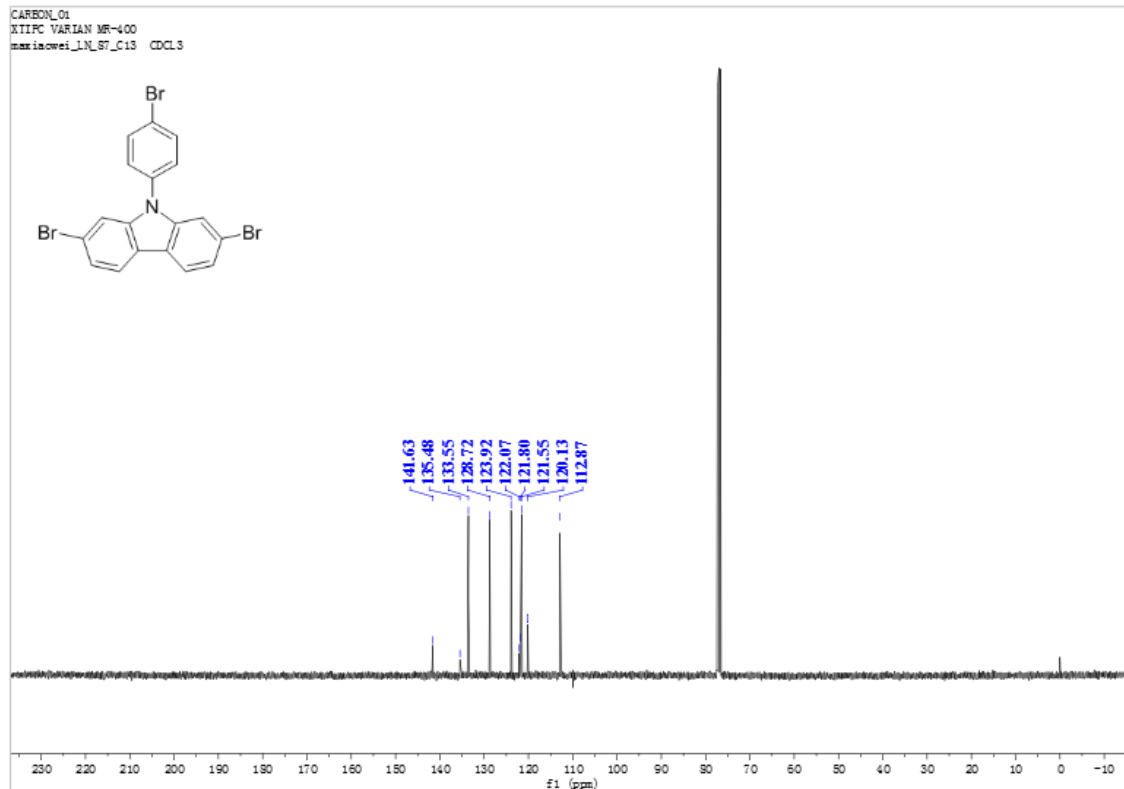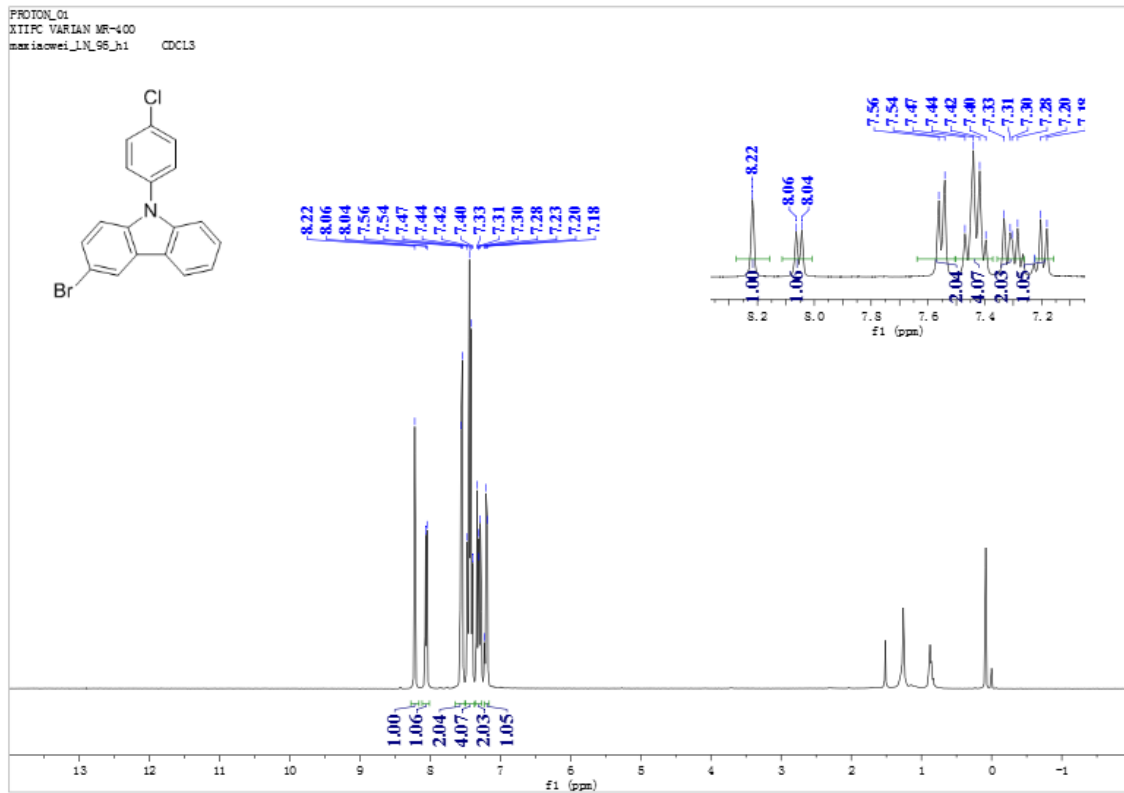

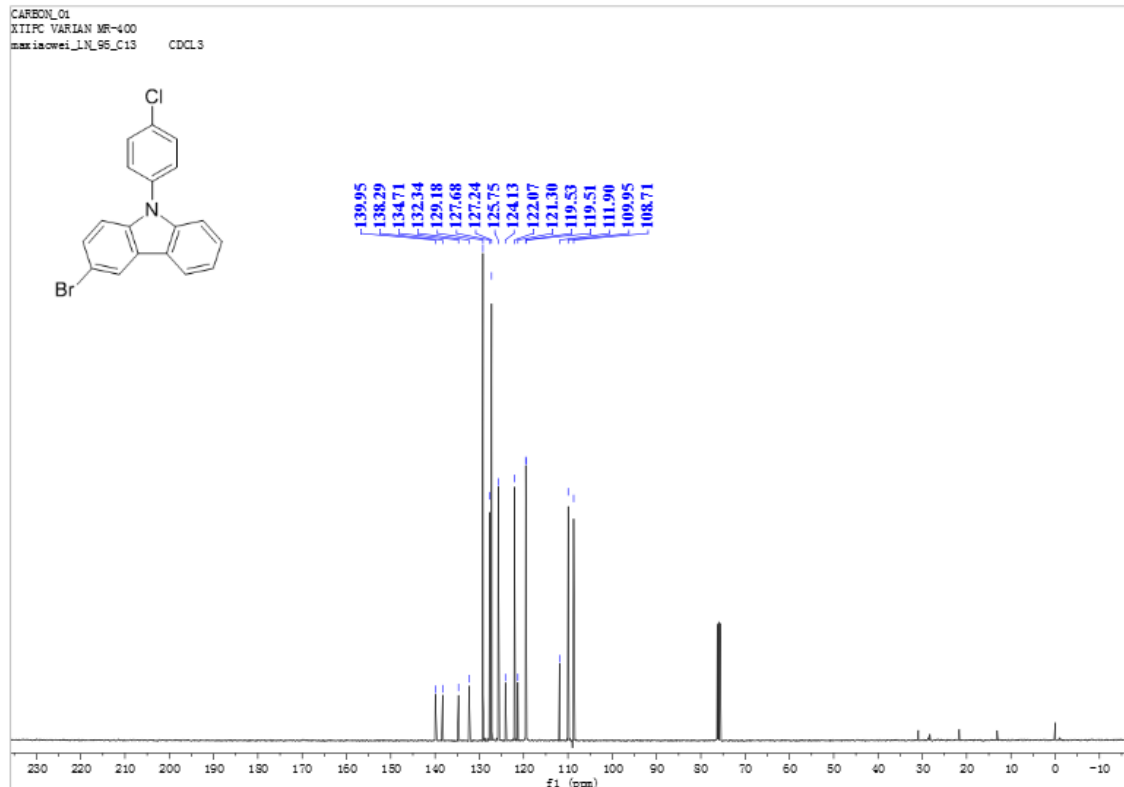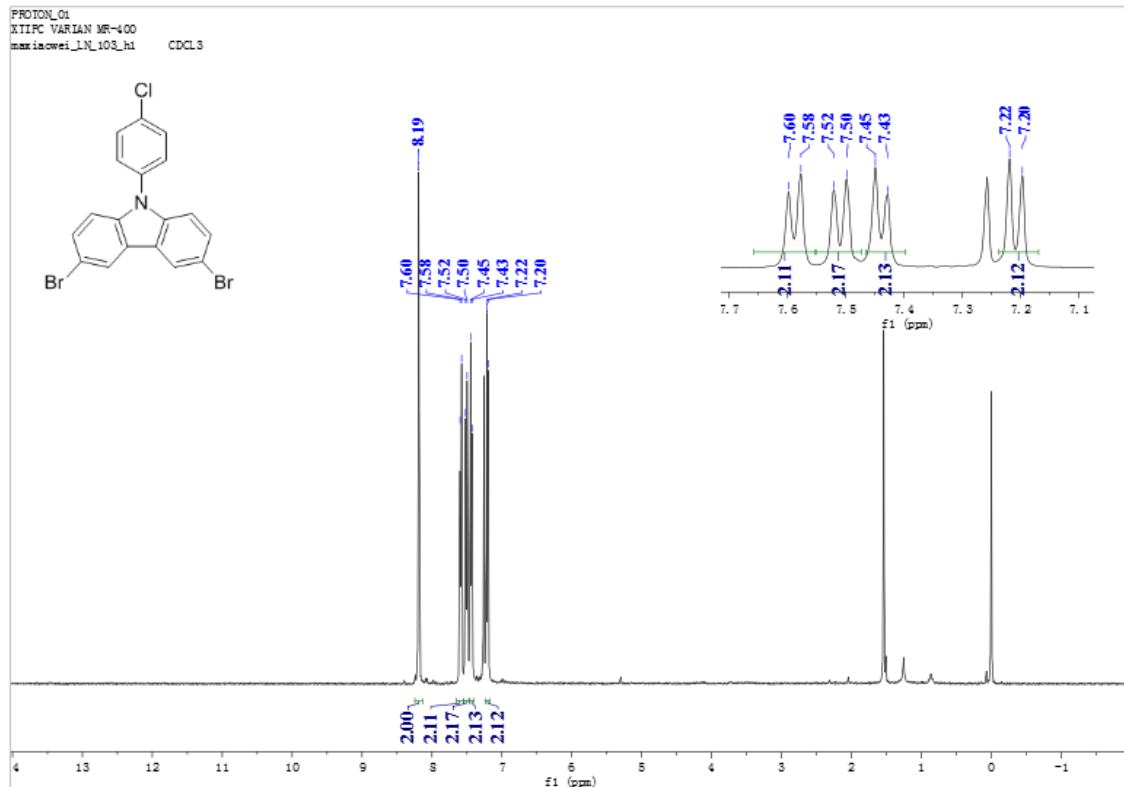

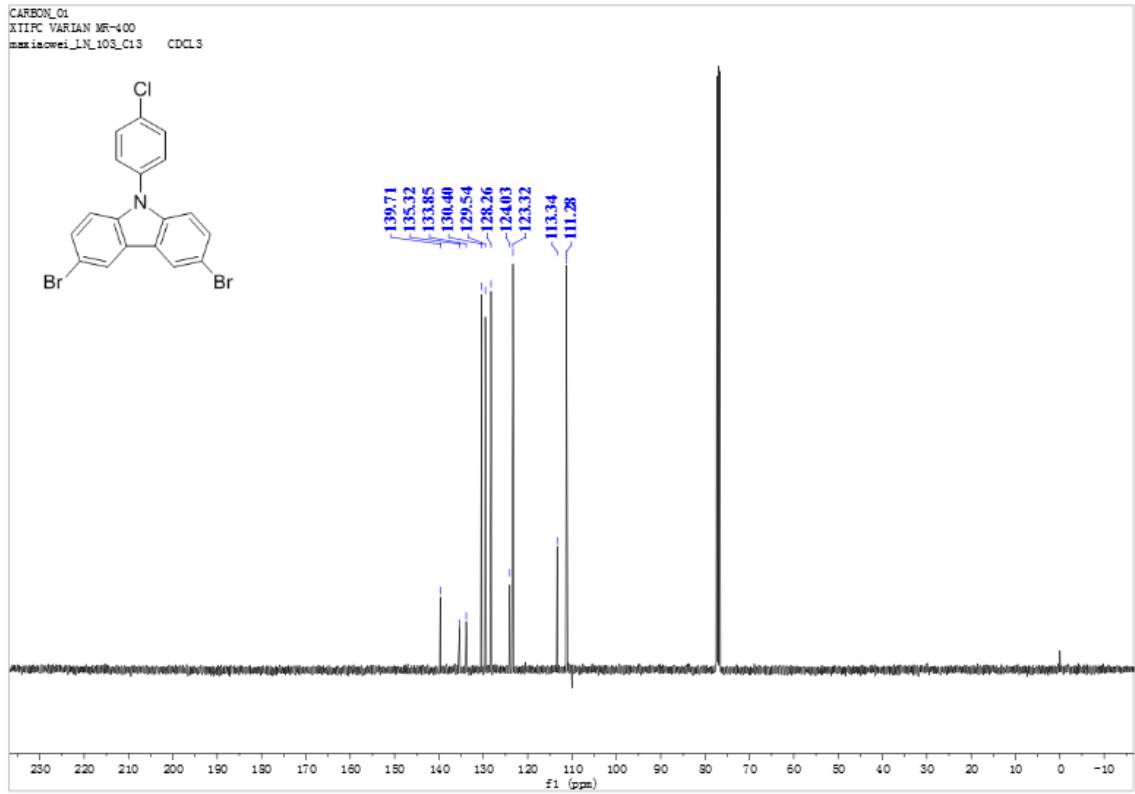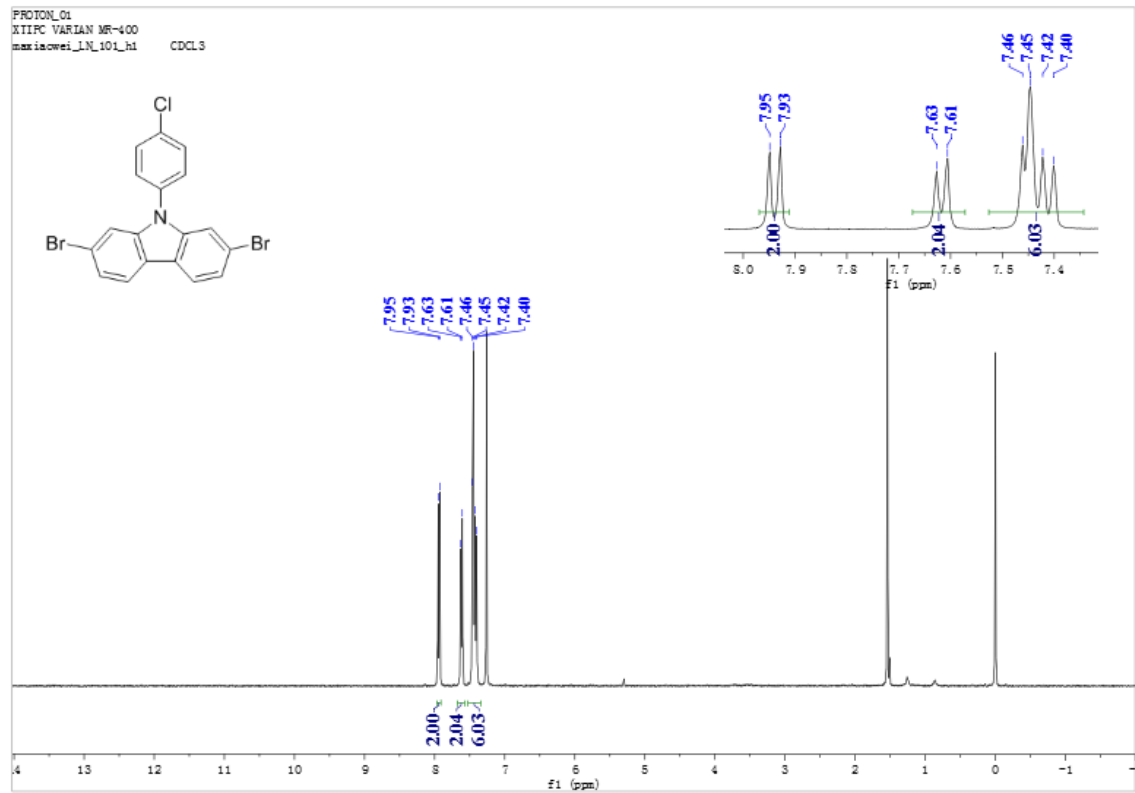

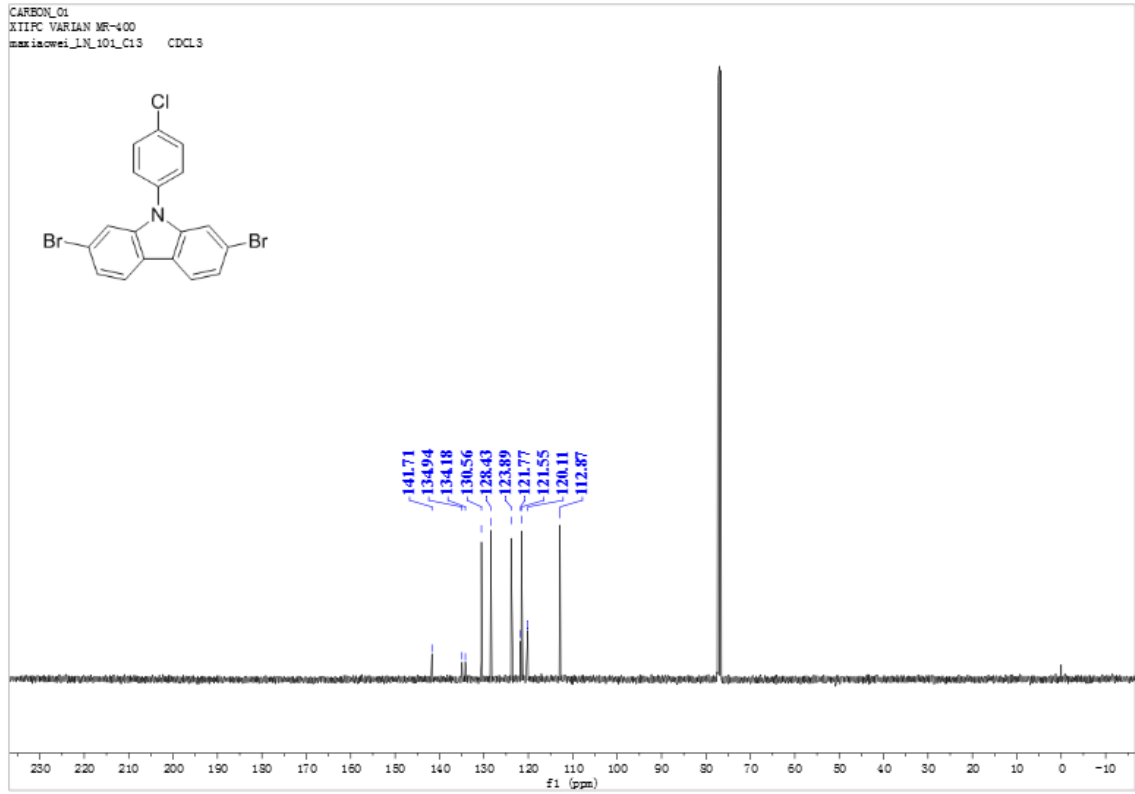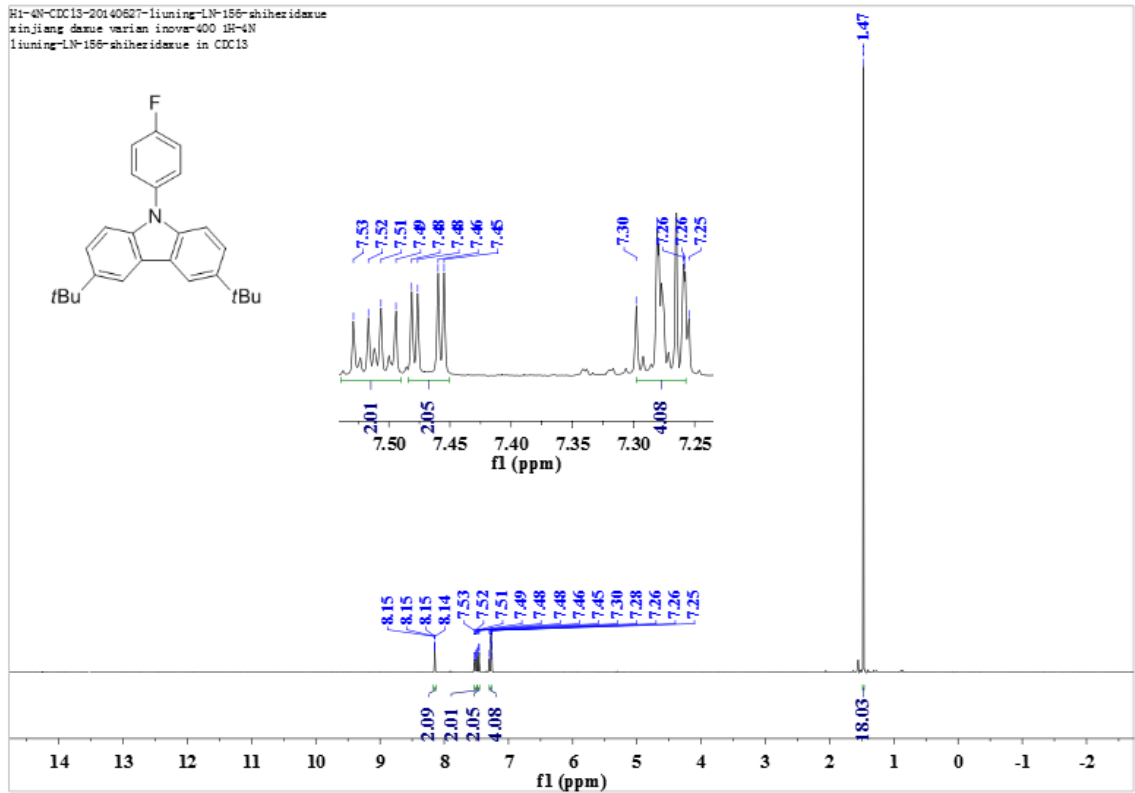

C13-4N-CDCl3-20140704-liuning-LN-156-zhiherizidaxue  
xinjiang daxue varian inovar-400 13C-4N  
liuning-LN-156-zhiherizidaxue in CDCl3

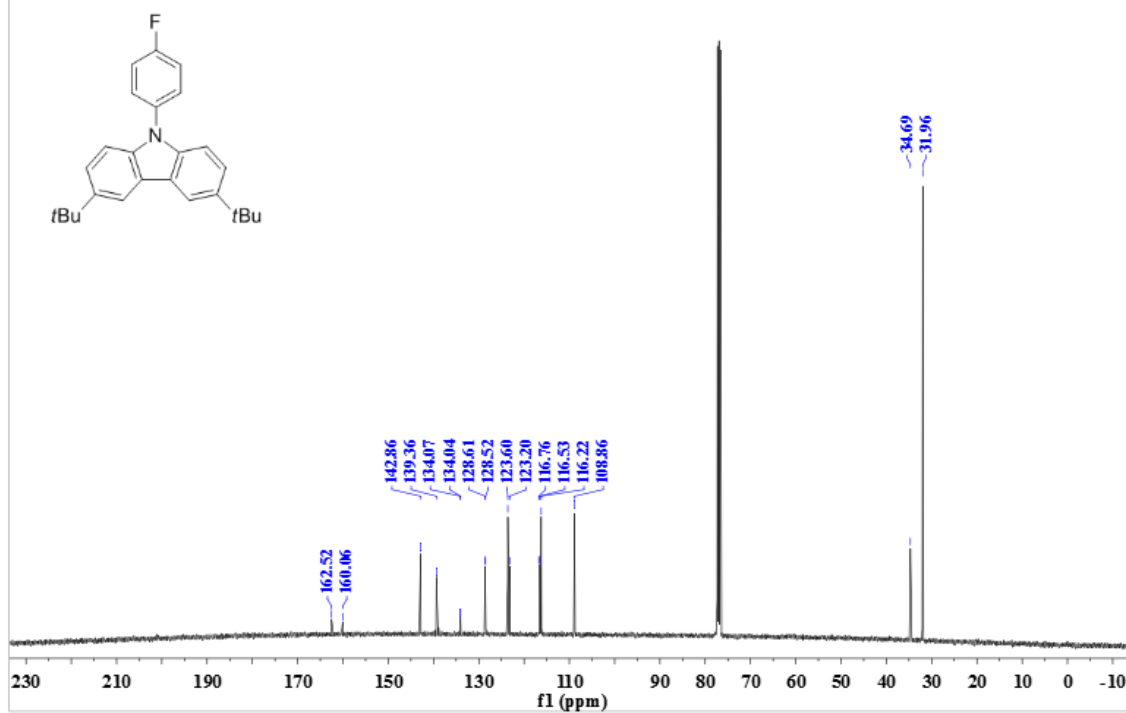

F19-4N-CDCl3-20140708-liuning-LN-156-zhiherizidaxue  
xinjiang daxue varian inovar-400 19F-4N  
liuning-LN-156-zhiherizidaxue  
in CDCl3

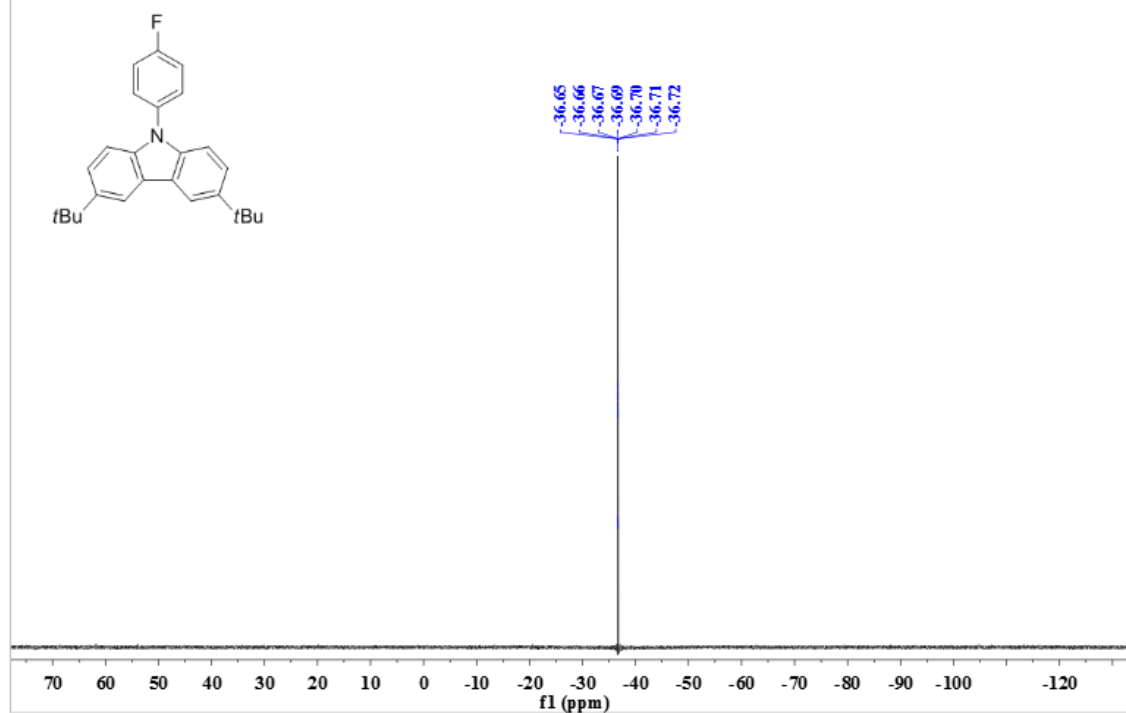

H1-4N-CDC13-20140709-liuning-LN-177-shiheridaxue  
 xinjiang daxue varian innova-600 1H-4N  
 liuning-LN-177-shiheridaxue  
 in CDCl3

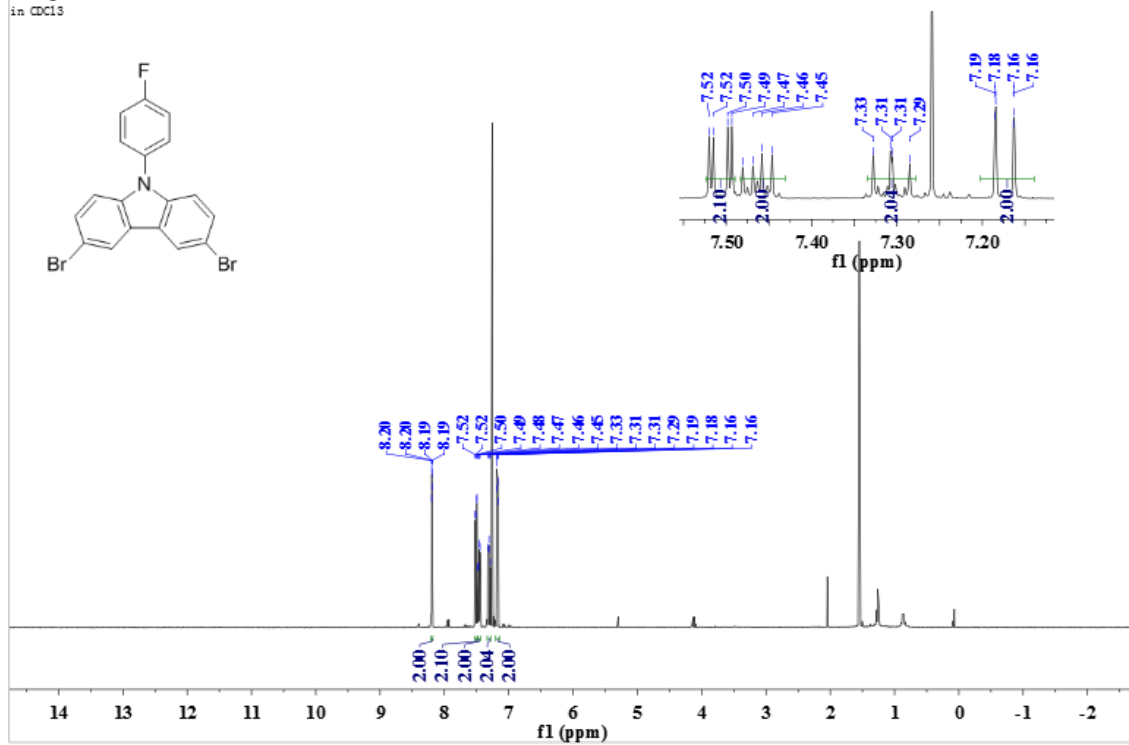

C13-4N-CDC13-20140713-liuning-LN-177-shiheridaxue  
 xinjiang daxue varian innova-600 13C-4N  
 liuning-LN-177-shiheridaxue in CDCl3

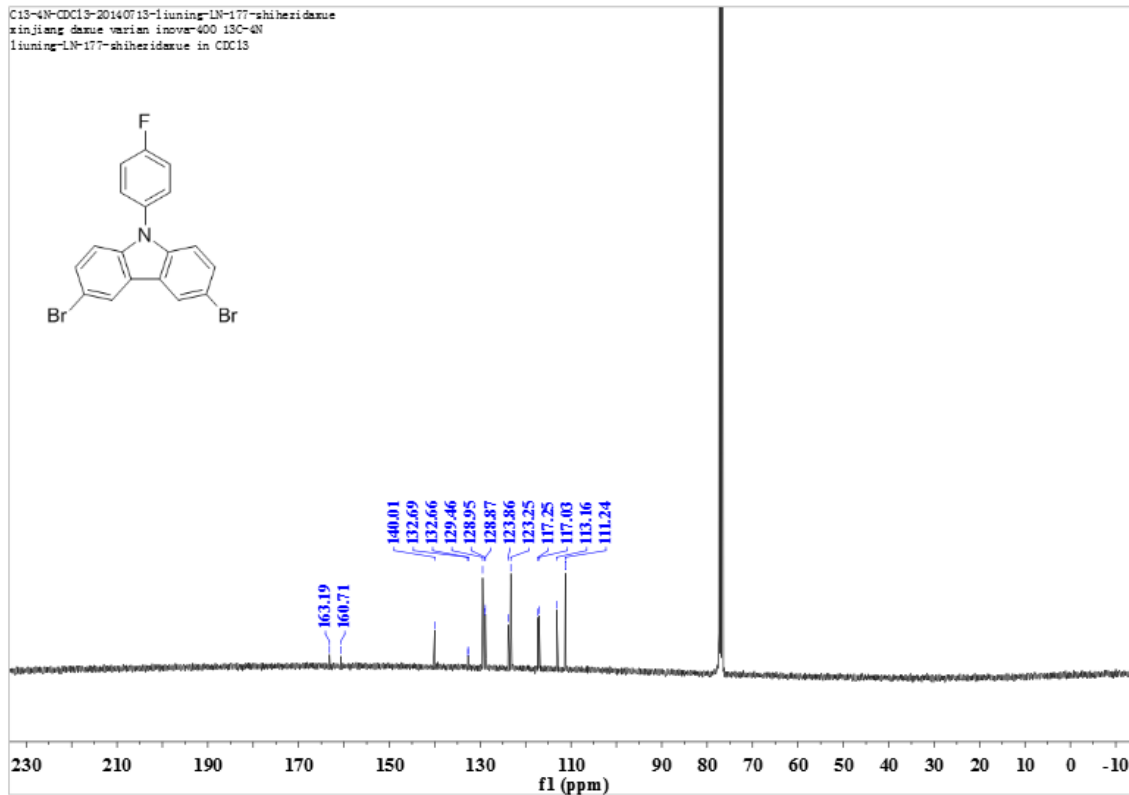

FIS-4N-CDC13-20140113-liuning-LN-177-shiheridaxue  
xinjiang daxue varian inovar-400 19F-4N  
liuning-LN-177-shiheridaxue in CDC13

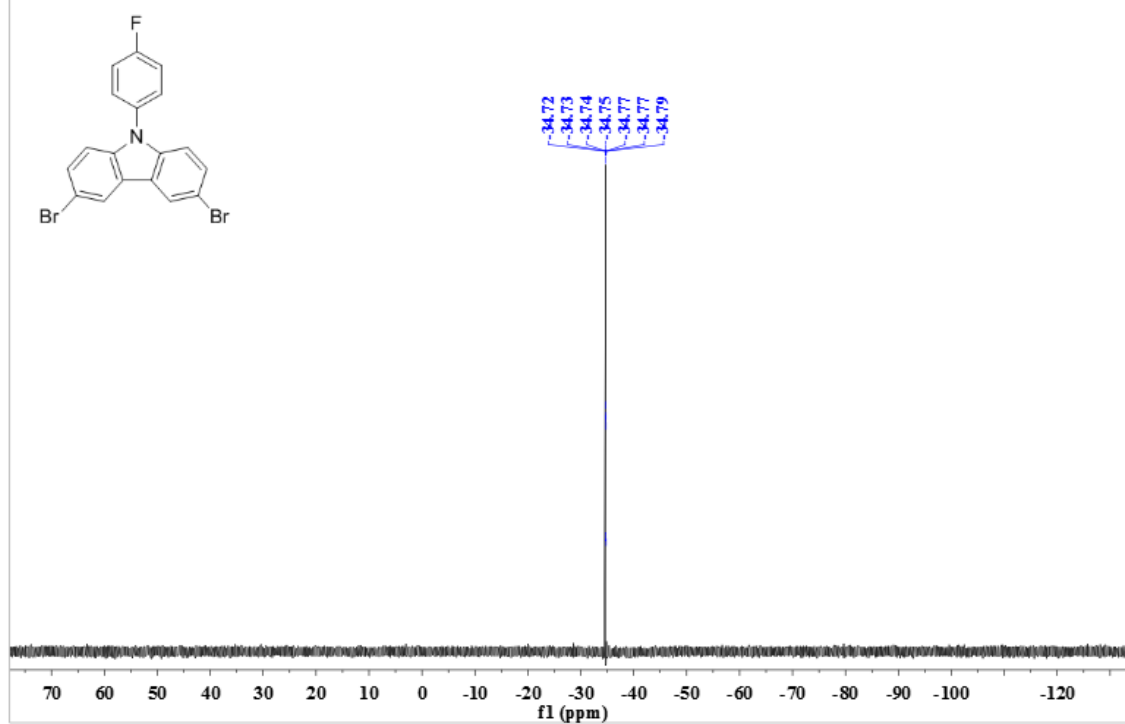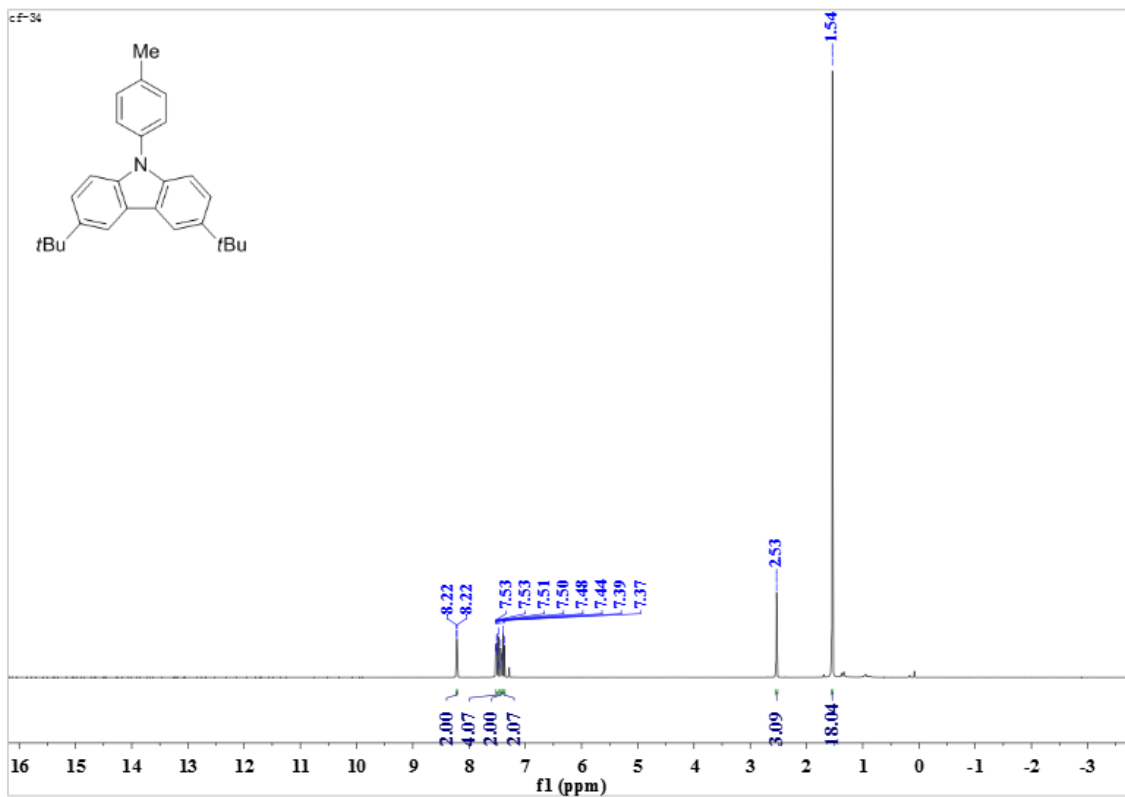



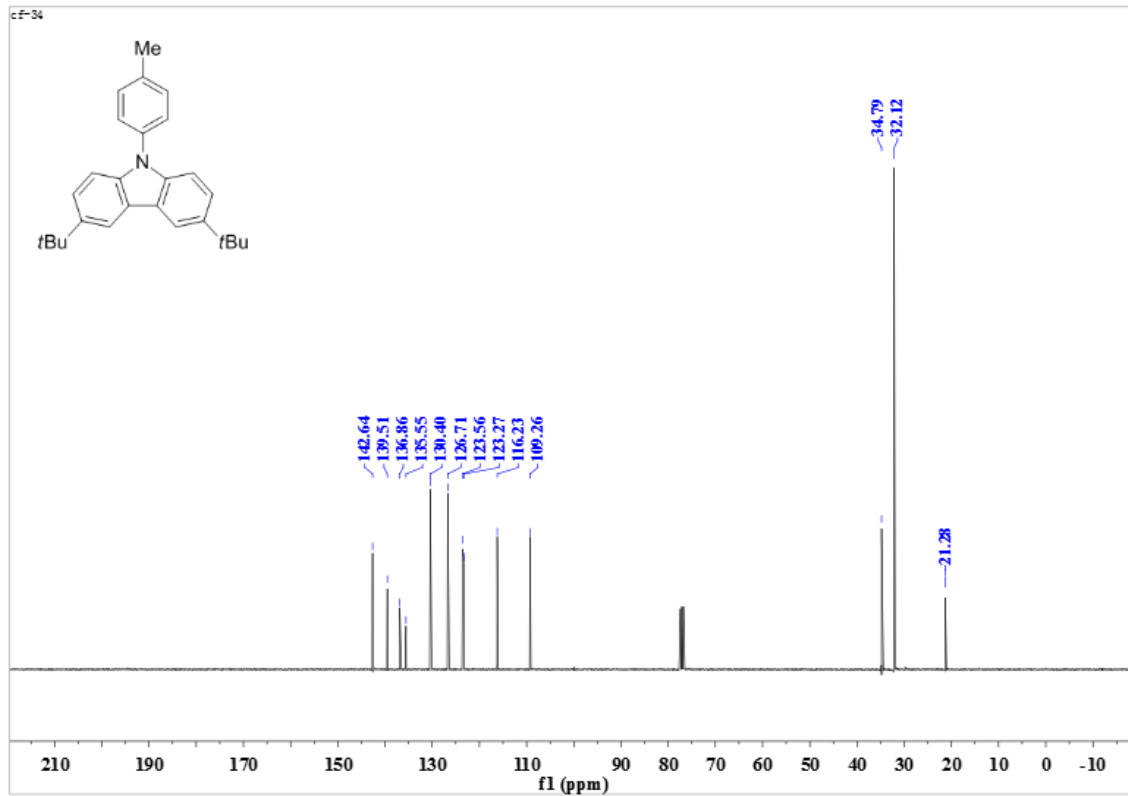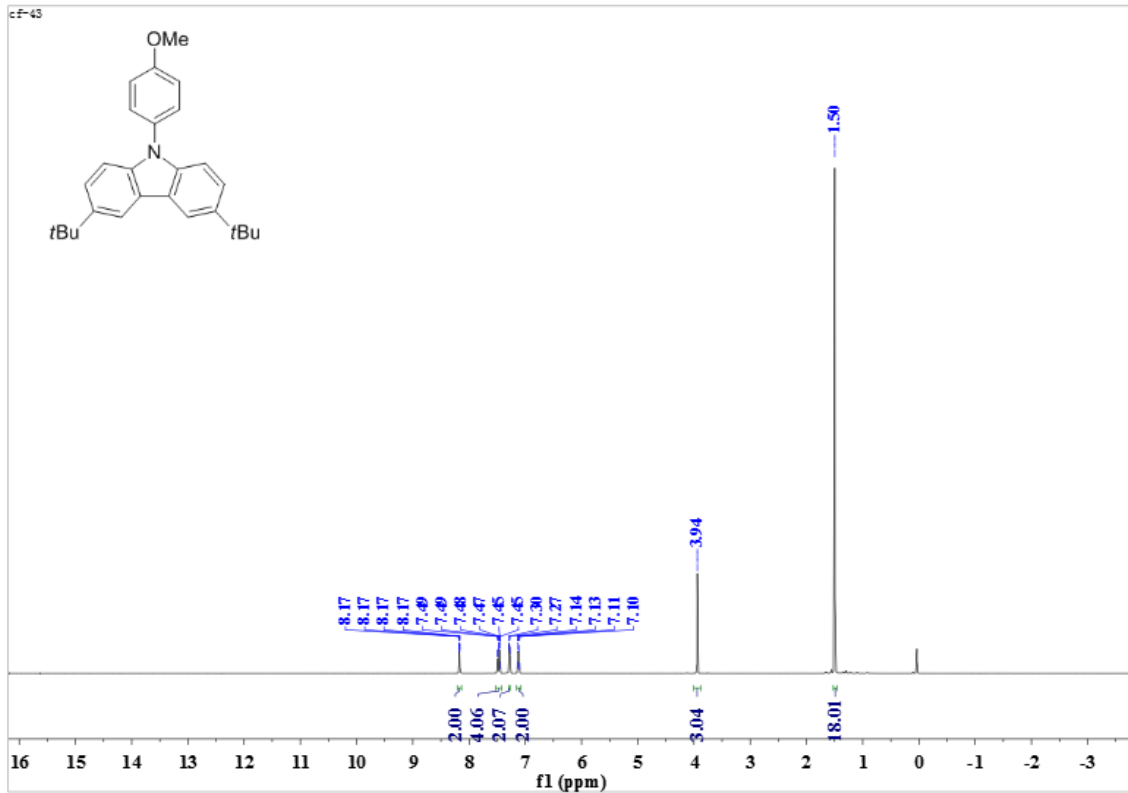

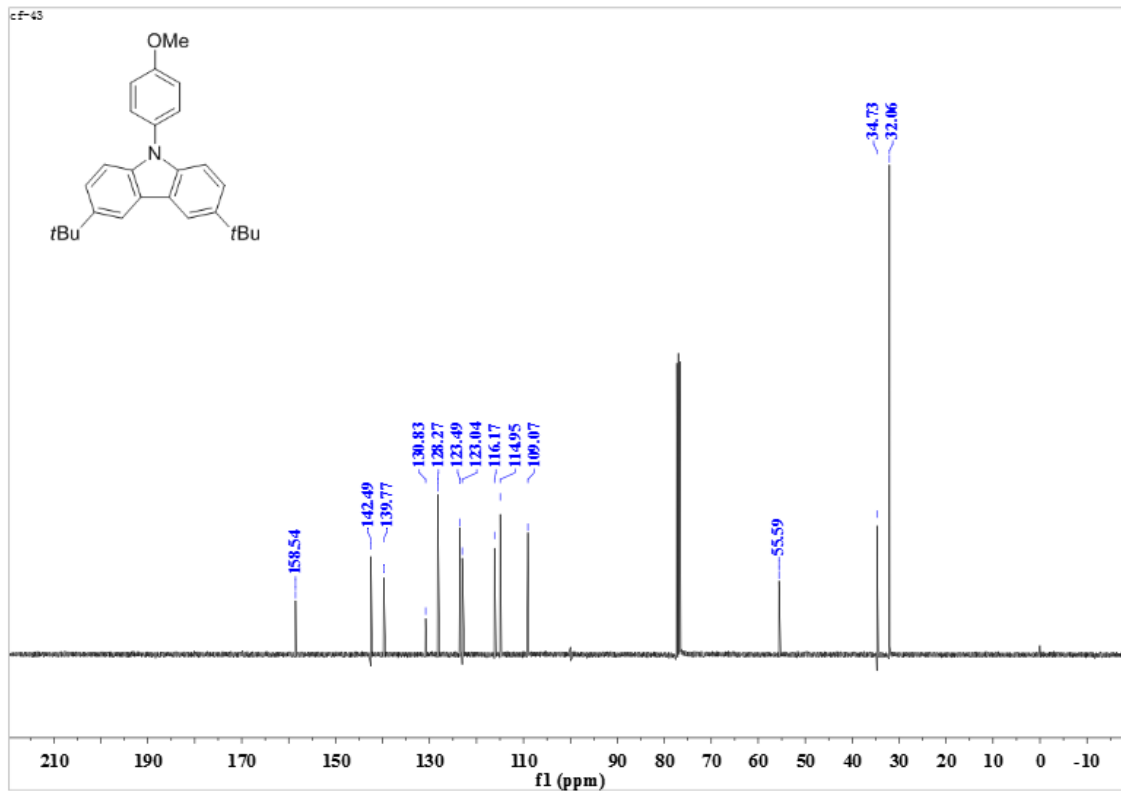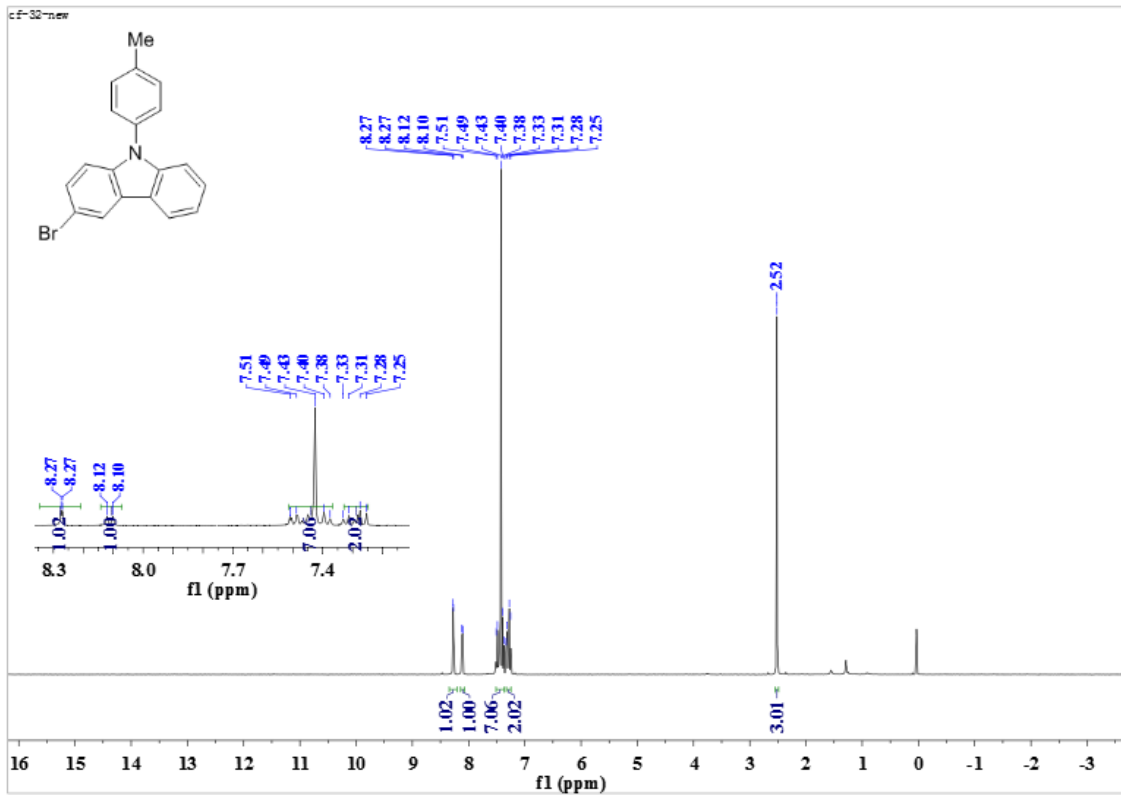

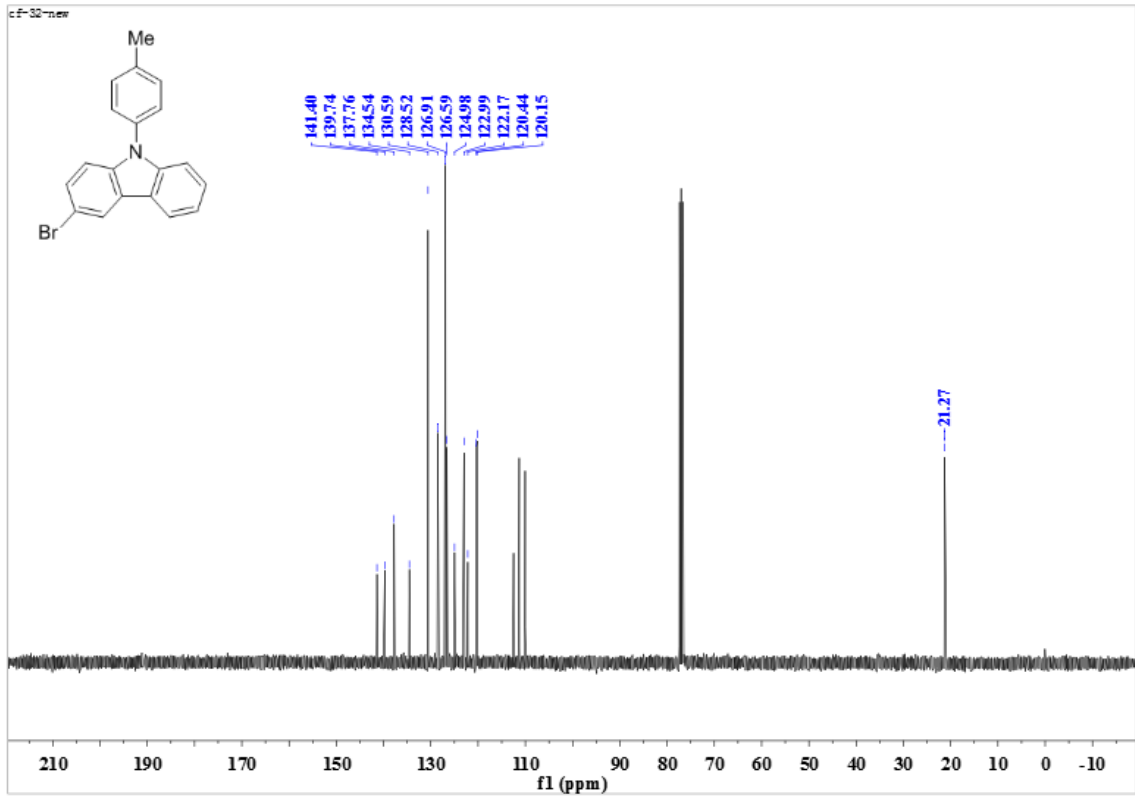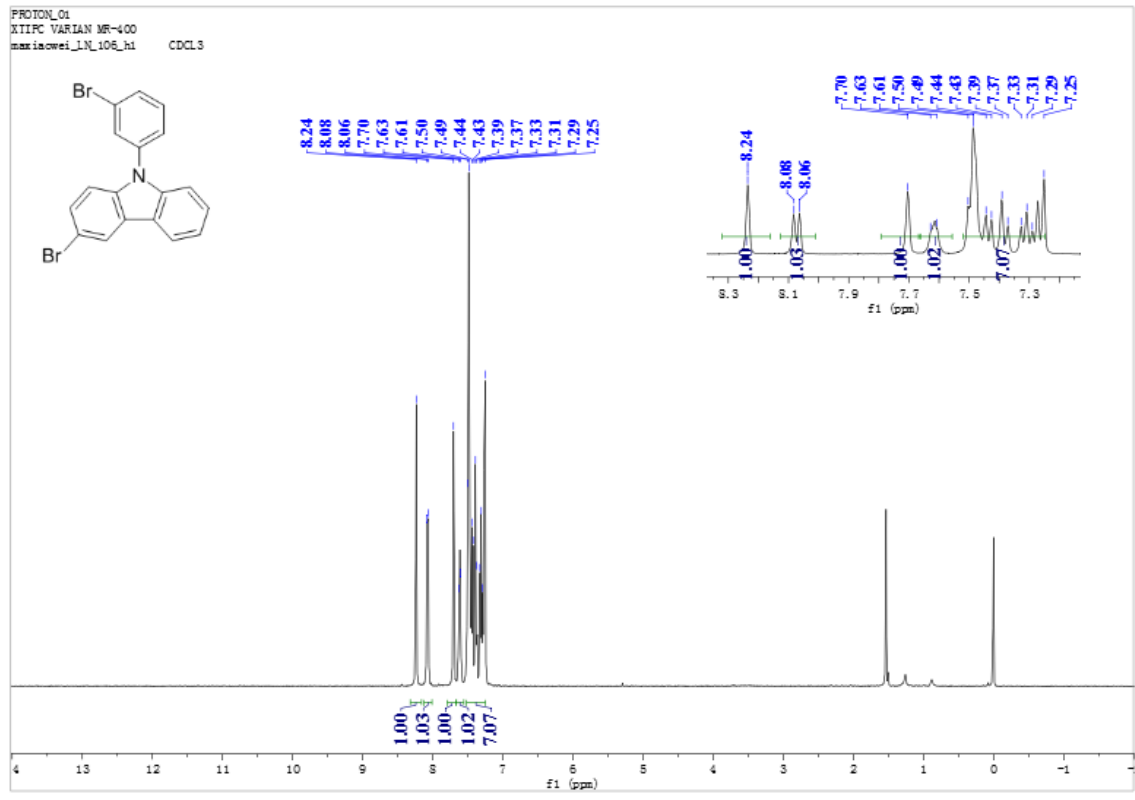

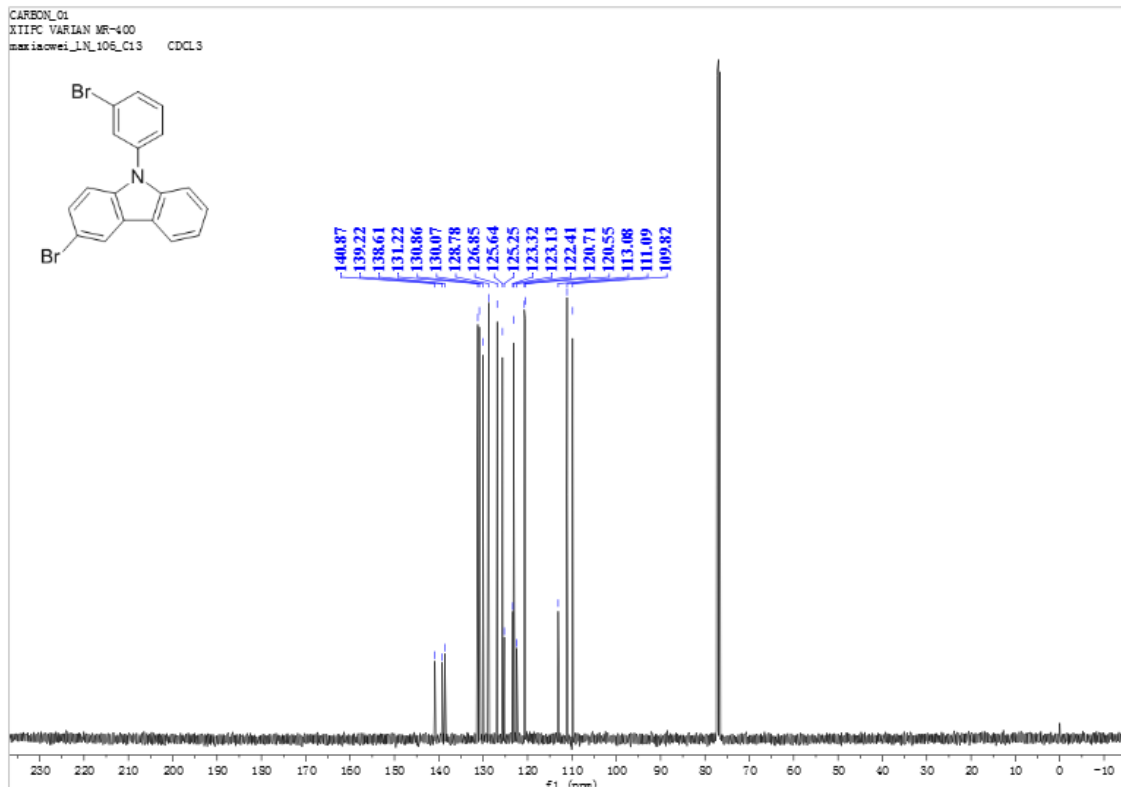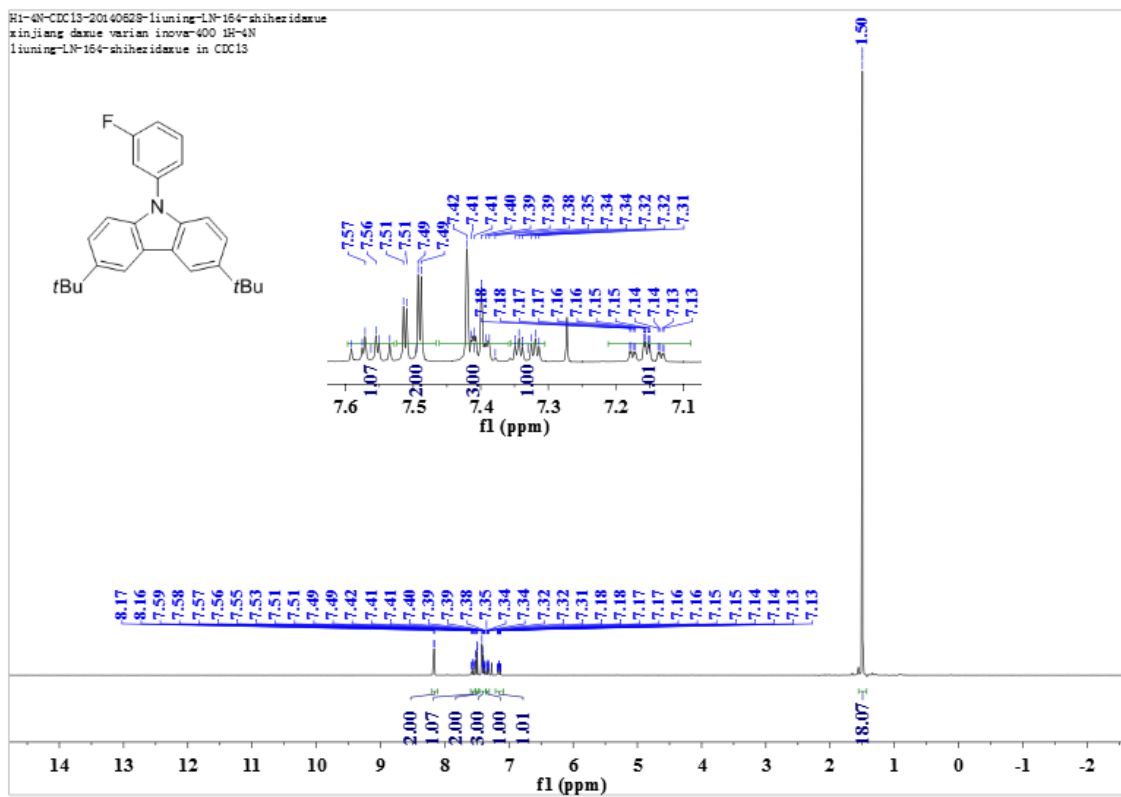

C13-4N-CDCl3-20140705-liuning-LN-164-zhihezidaxue  
xinjiang daxue varian innova-600 13C-4N  
liuning-LN-164-zhihezidaxue in CDCl3

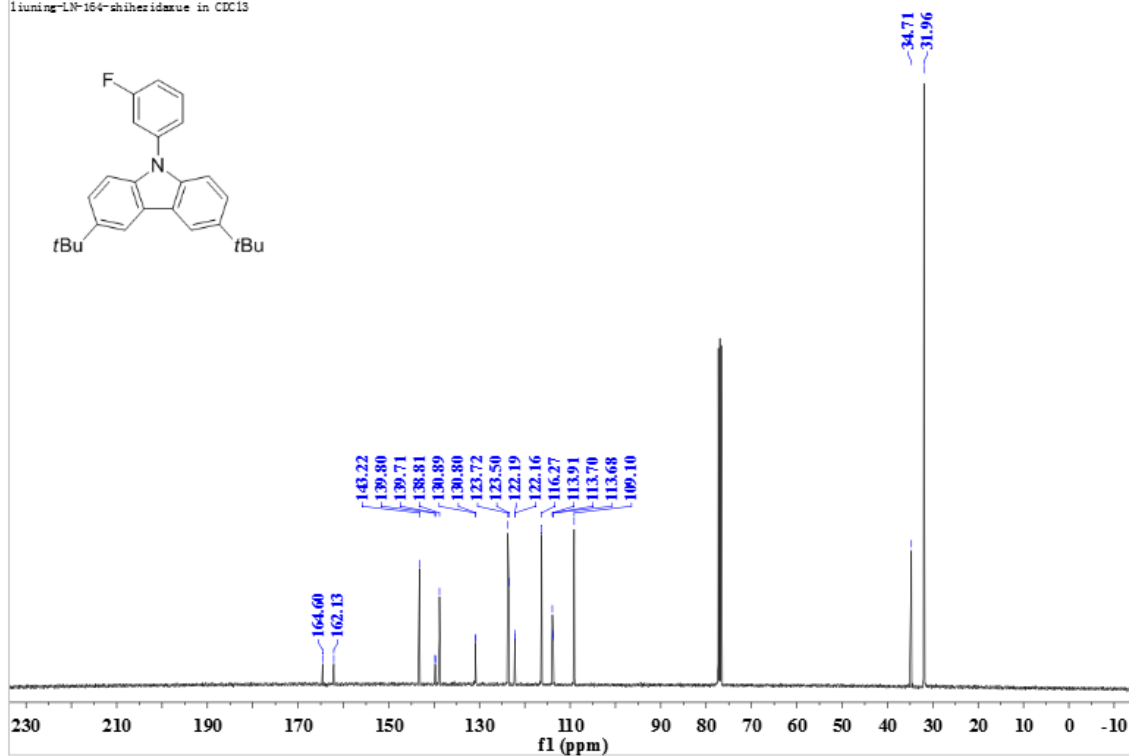

F19-4N-CDCl3-20140705-liuning-LN-164-zhihezidaxue  
xinjiang daxue varian innova-600 19F-4N  
liuning-LN-164-zhihezidaxue in CDCl3

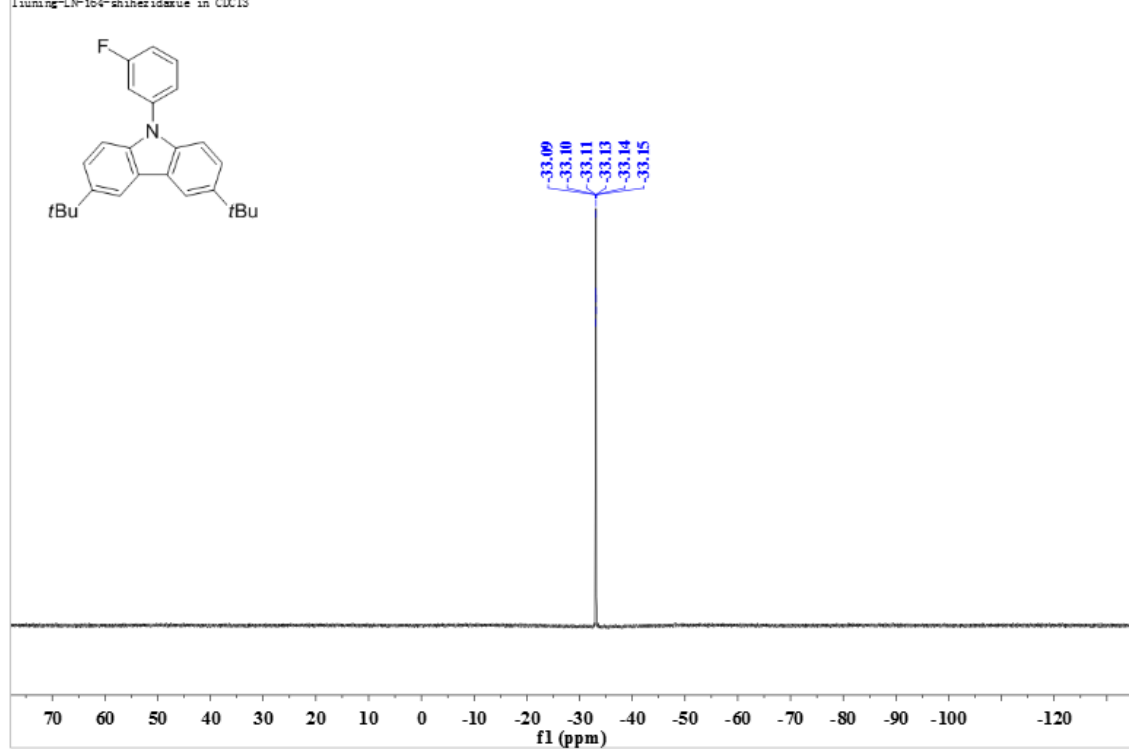

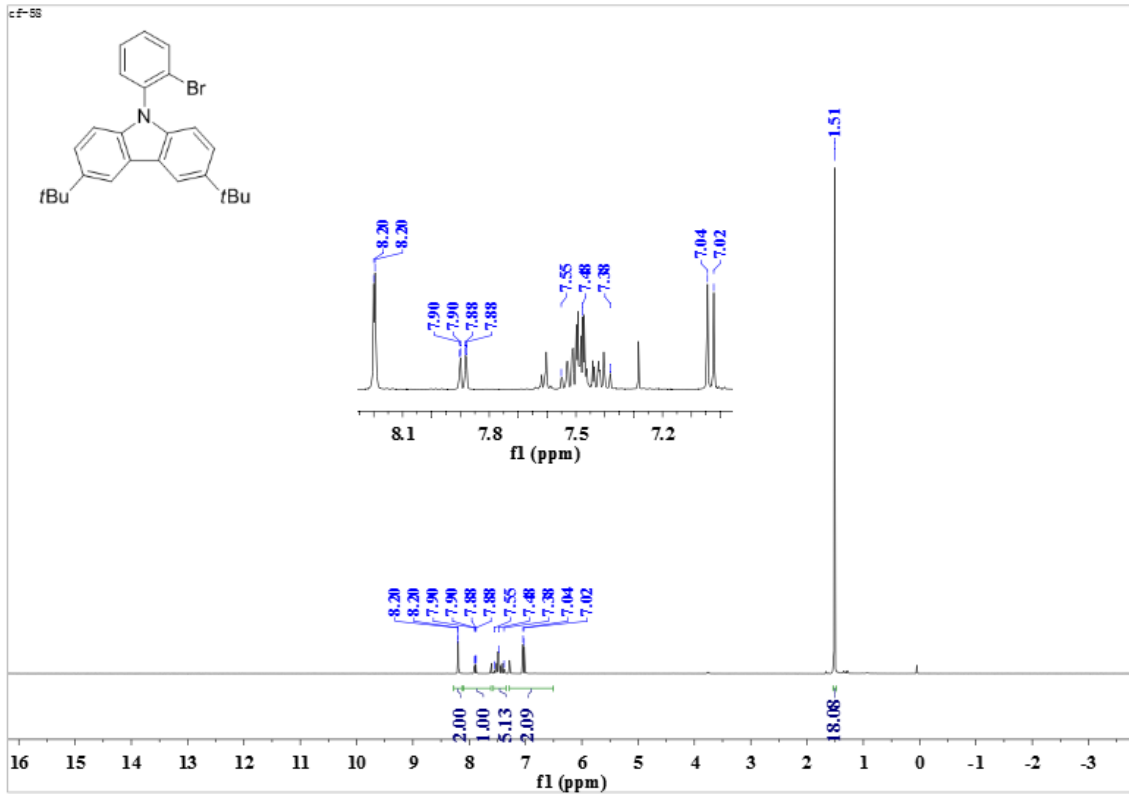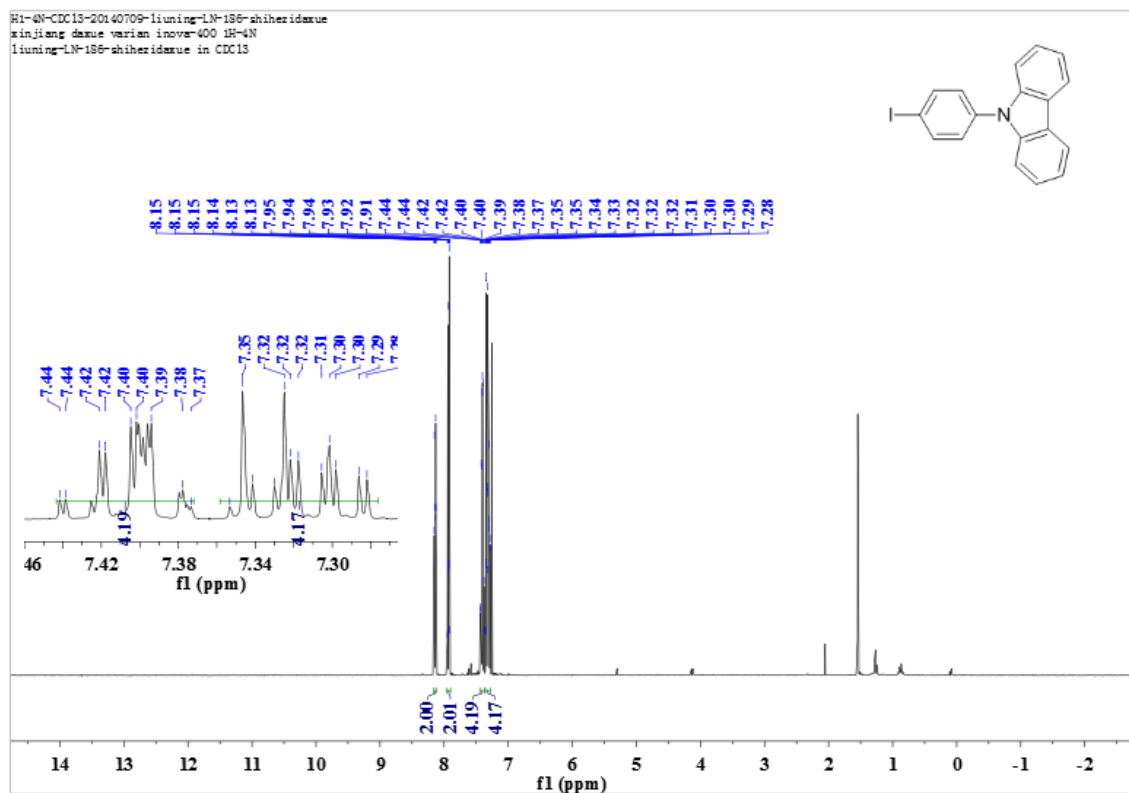

C13-4N-CDCl3-20140715-liuning-LN-186-zhiherizadaxue  
 xirijiang daxue varian inover-400 13C-4N  
 liuning-LN-186-zhiherizadaxue in CDCl3

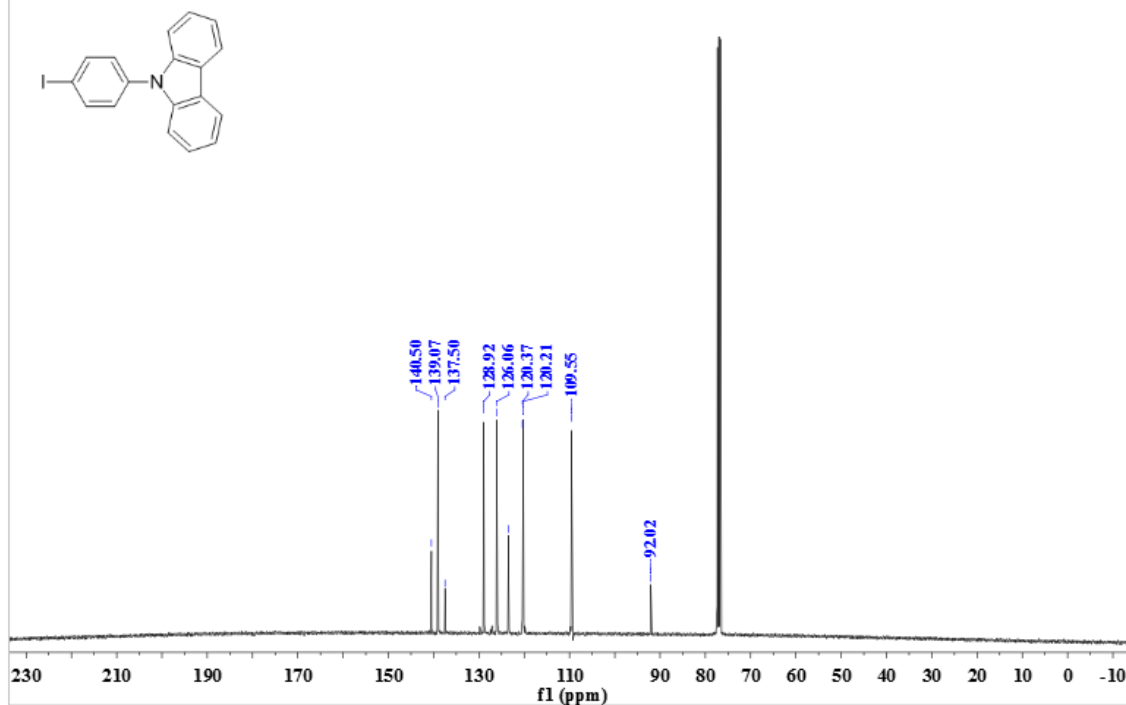

PROTON\_01  
 XTIPC VARIAN MR-400  
 maxiaowei\_JH\_105\_h1 CDCl3

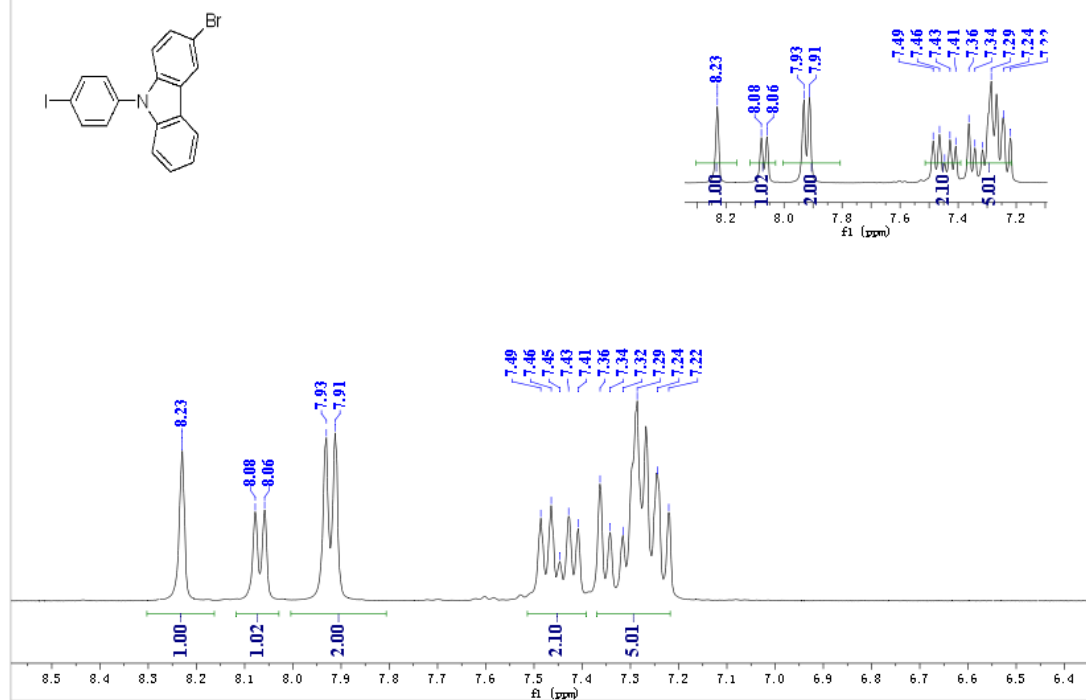

CARBON\_01  
XIIIC VARIAN MR-400  
maxiaowei\_1N\_105\_C13 CDCl3

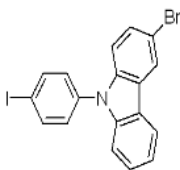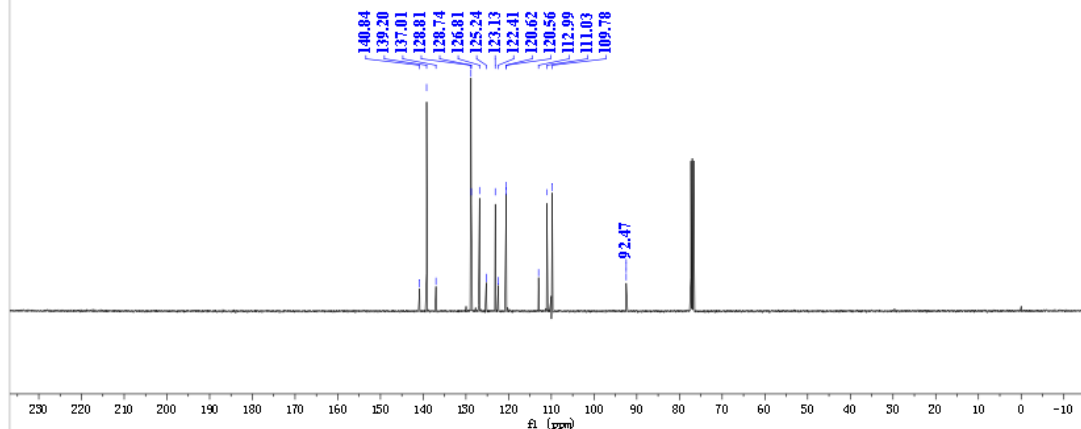

PROTON\_01  
XIIIC VARIAN MR-400  
maxiaowei\_1N\_102\_h1 CDCl3

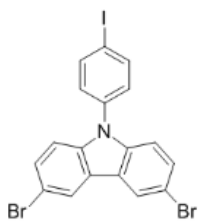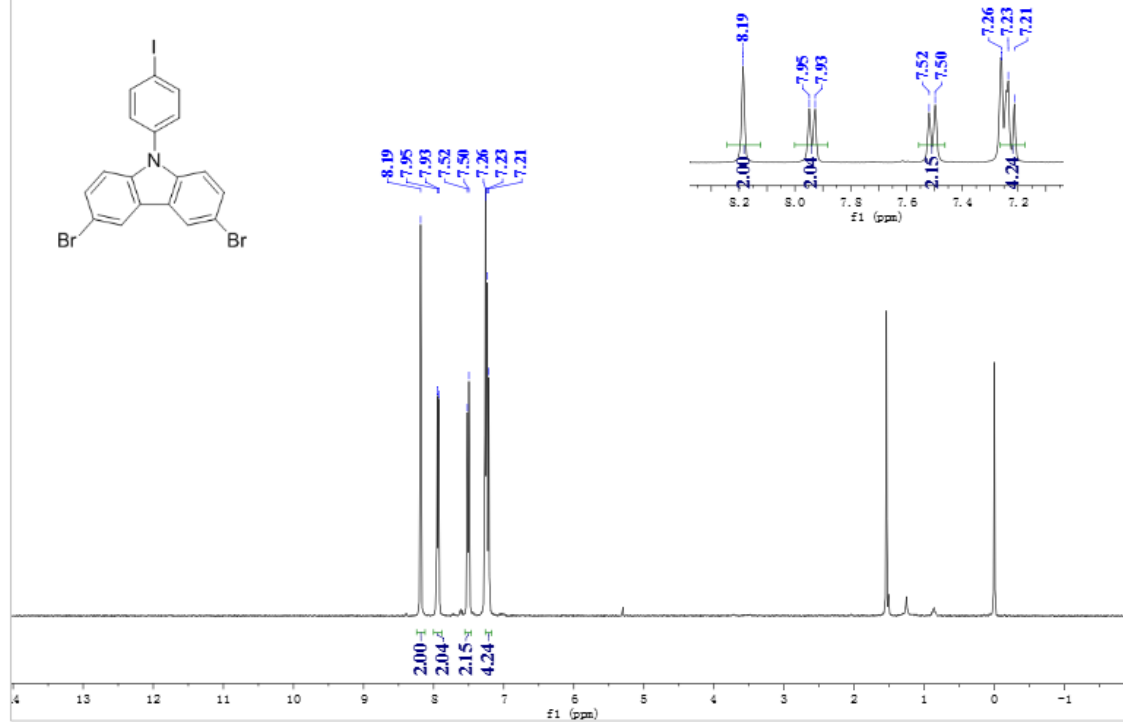



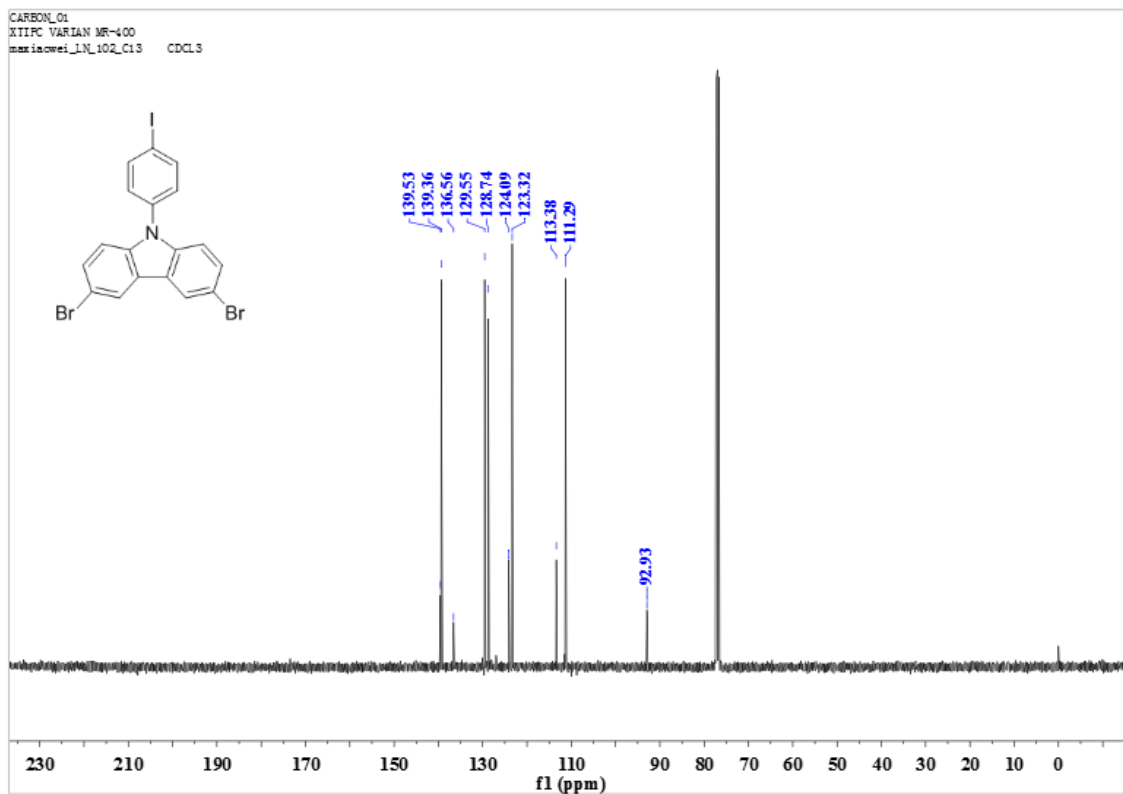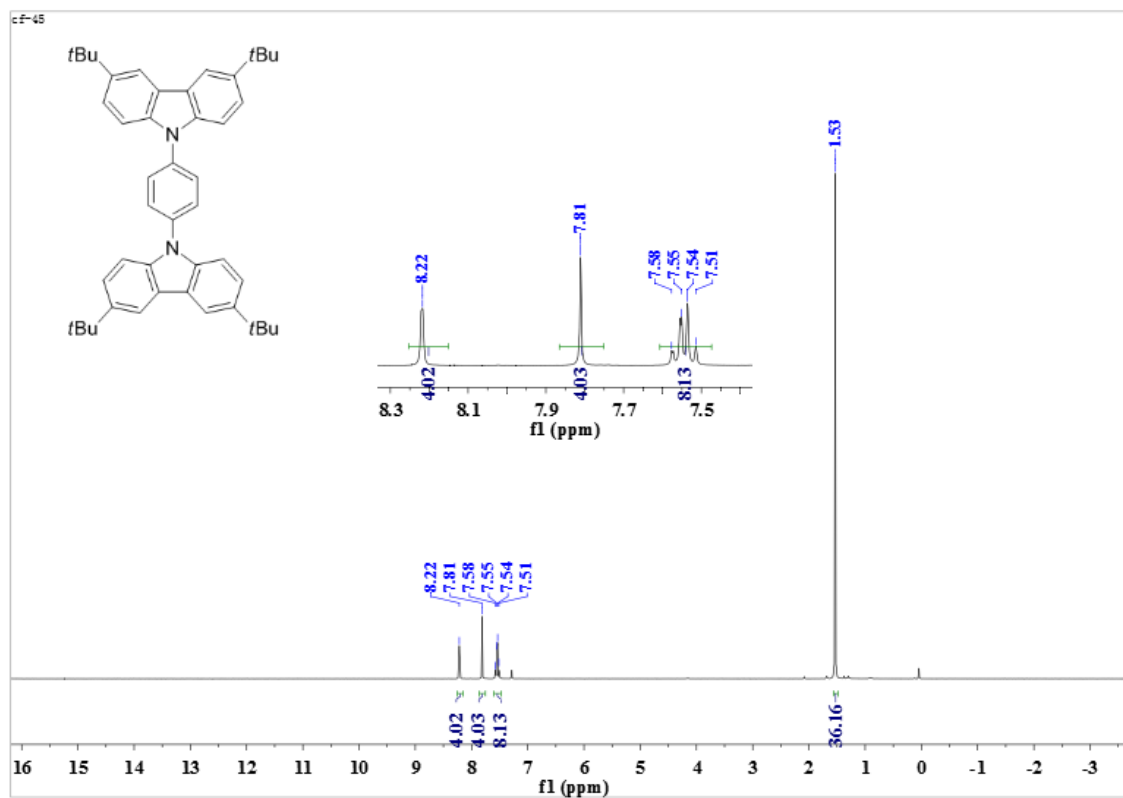

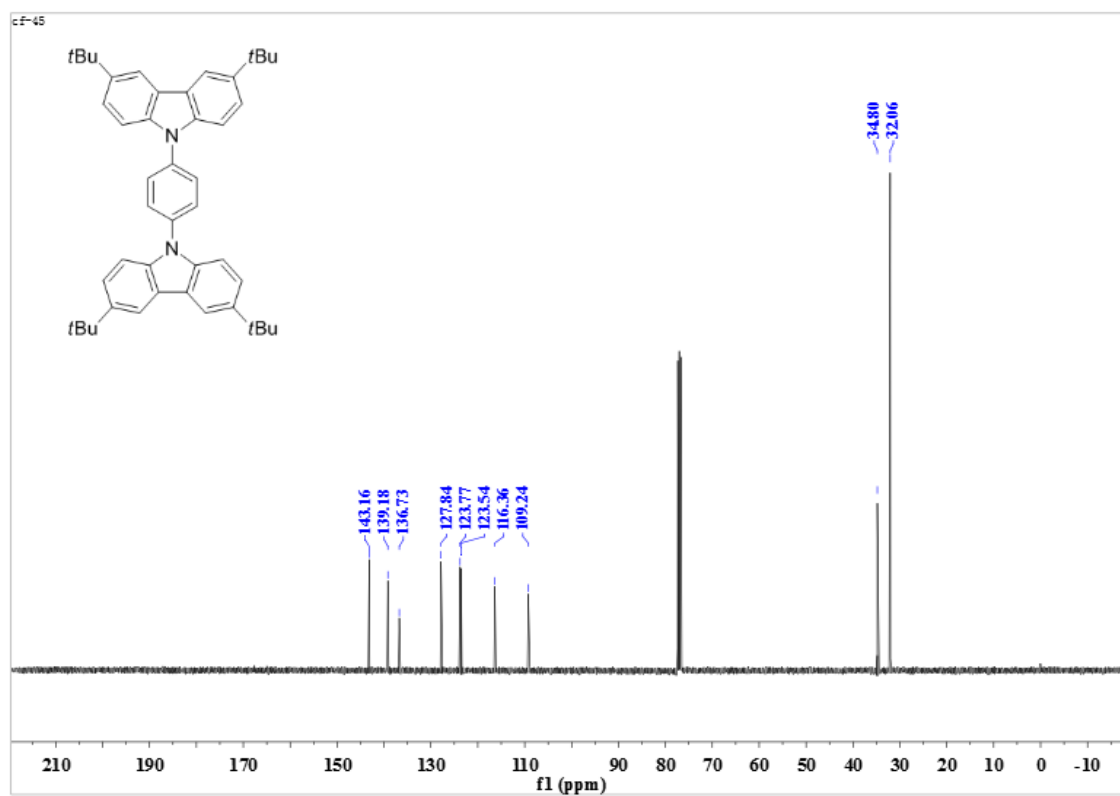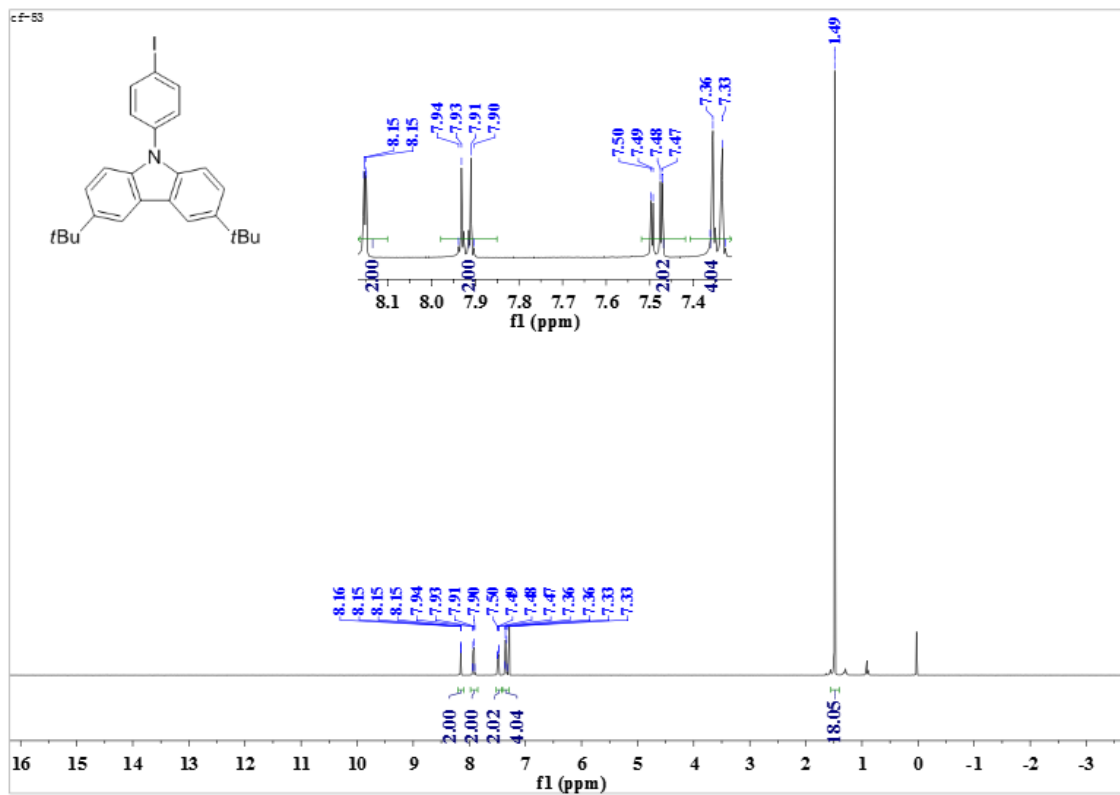

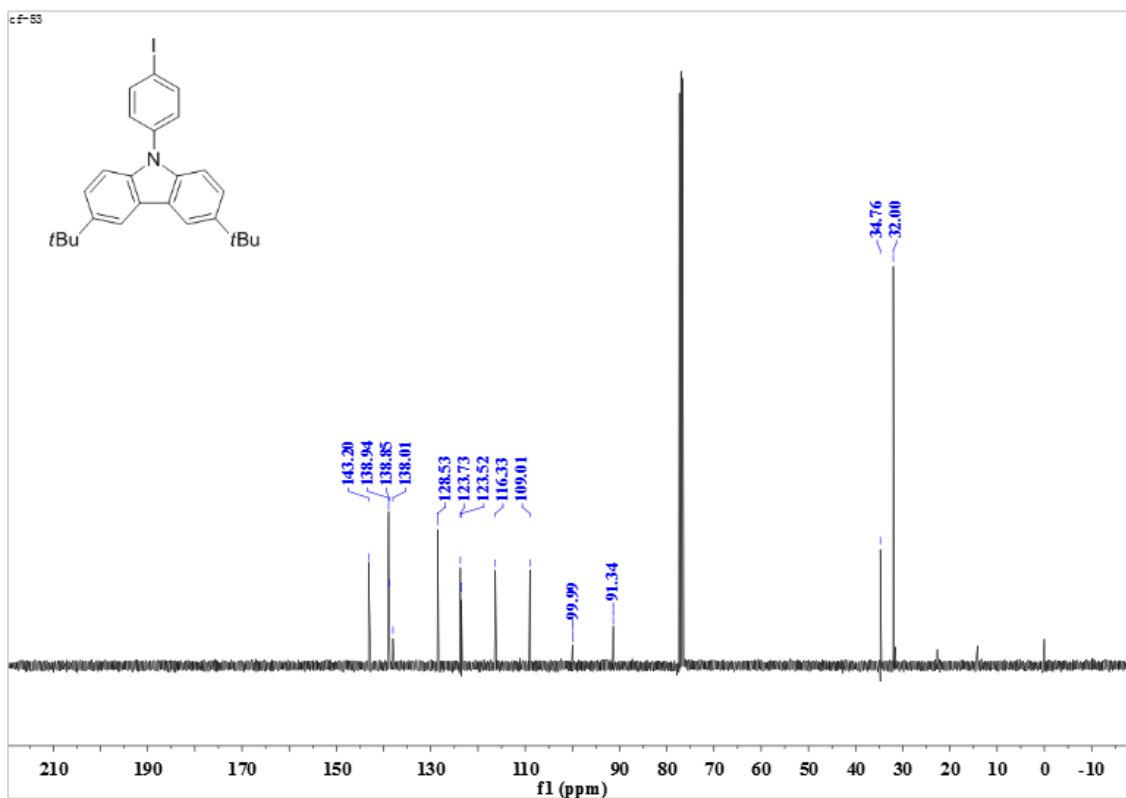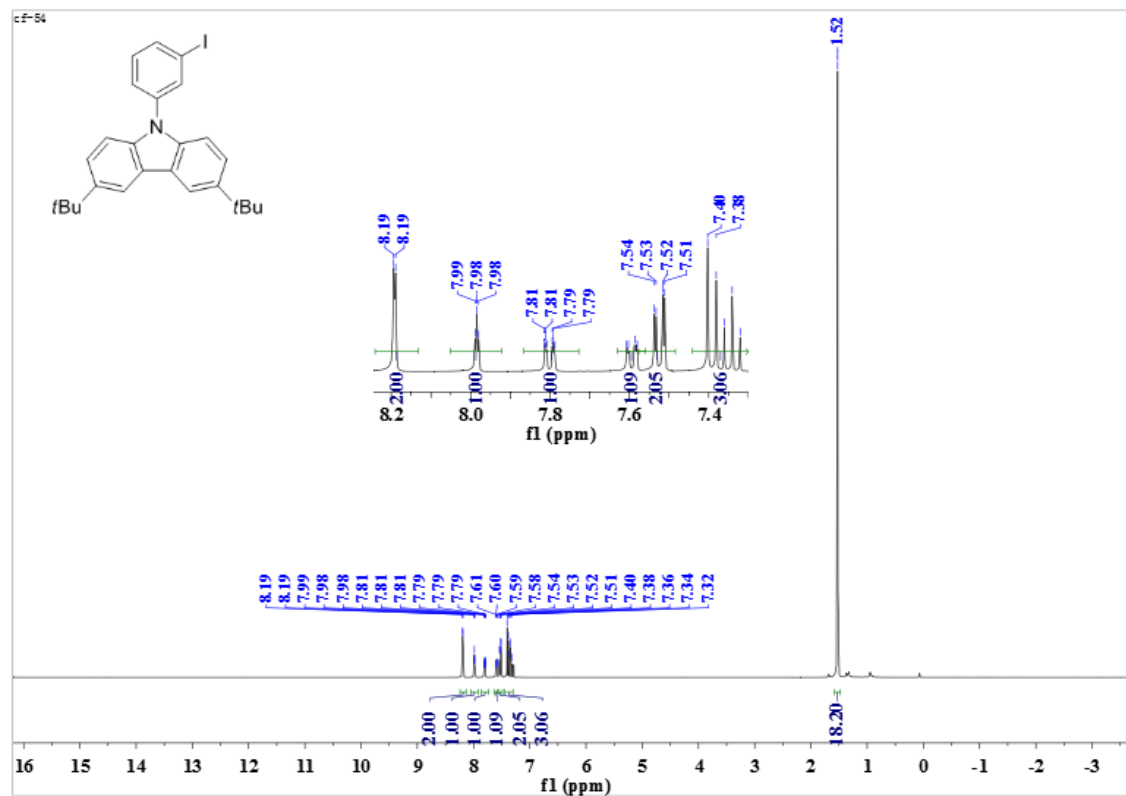

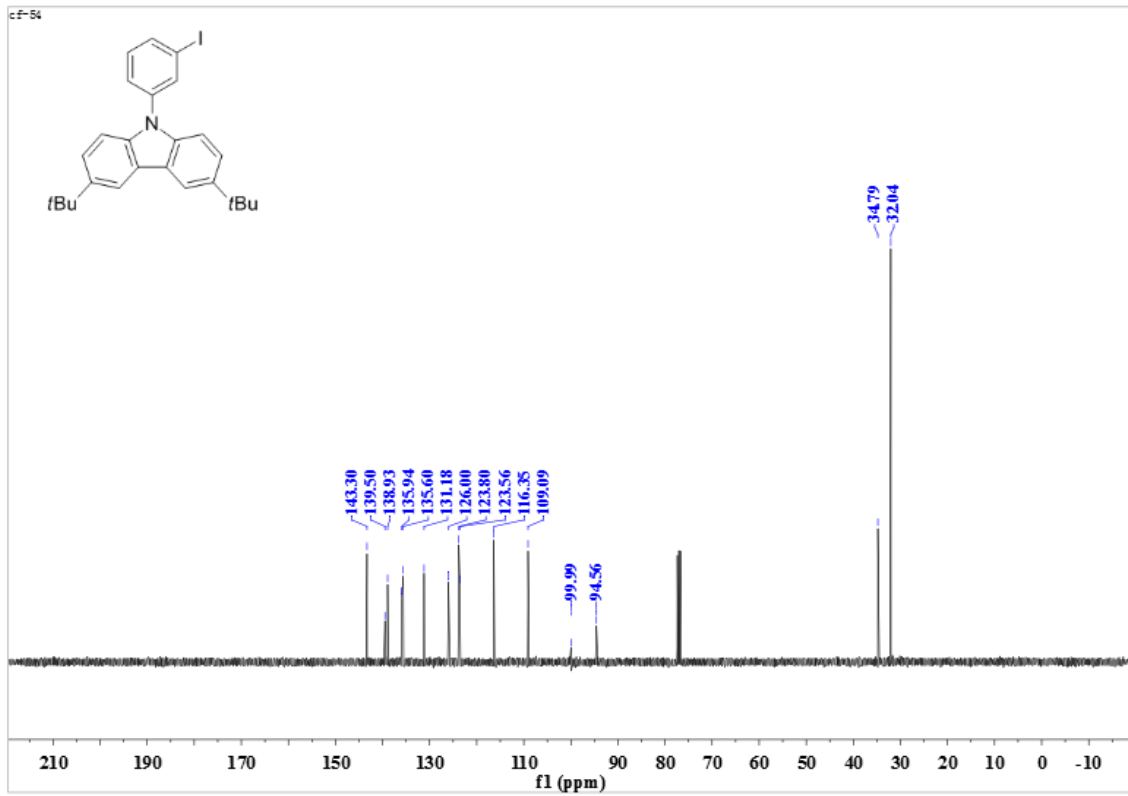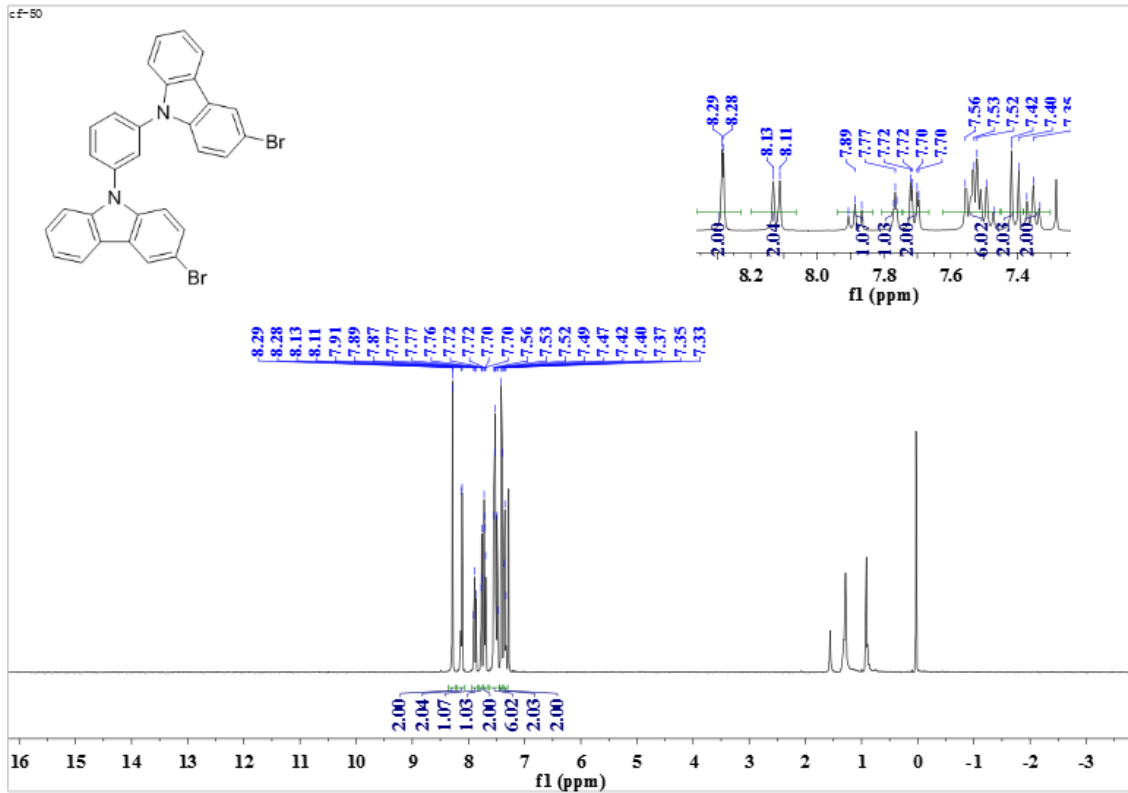

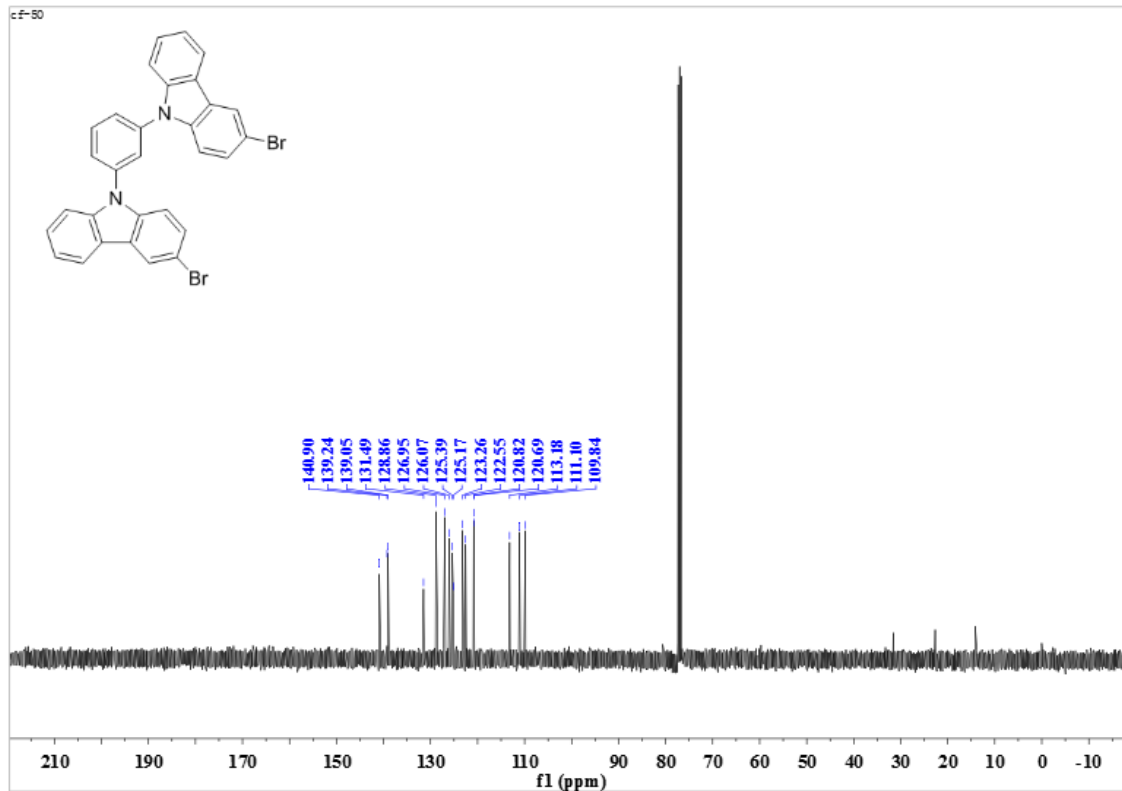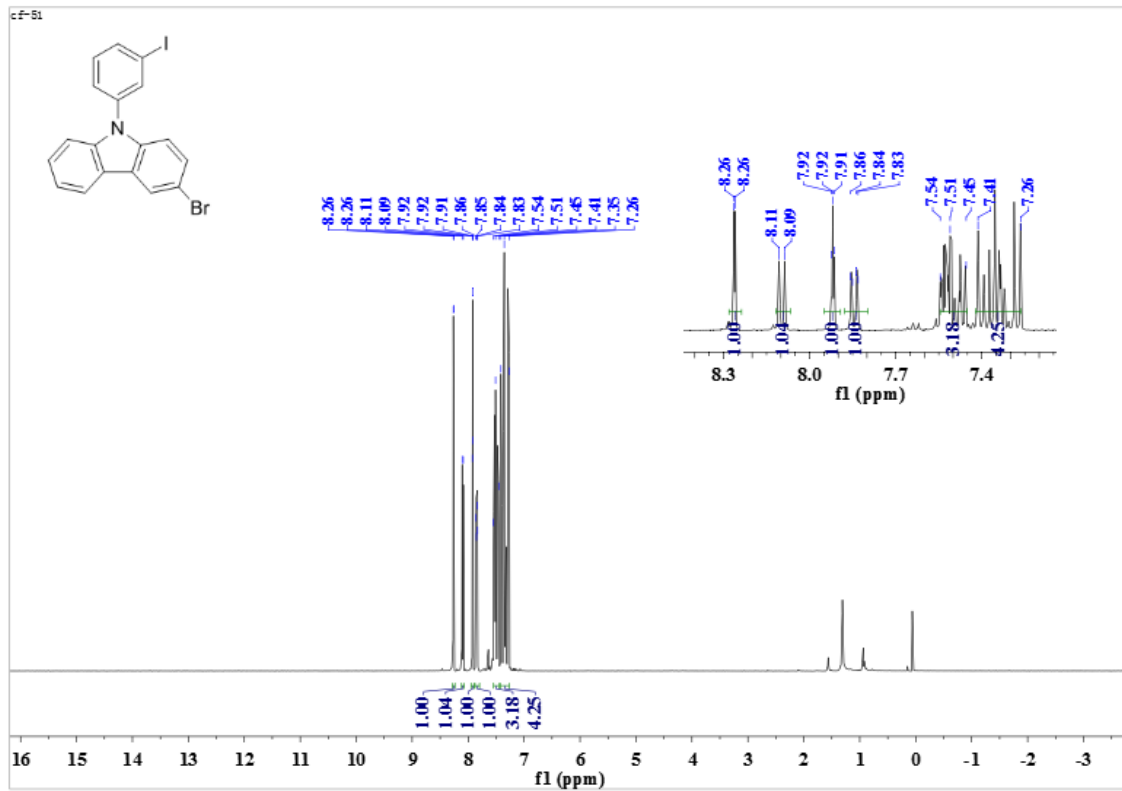

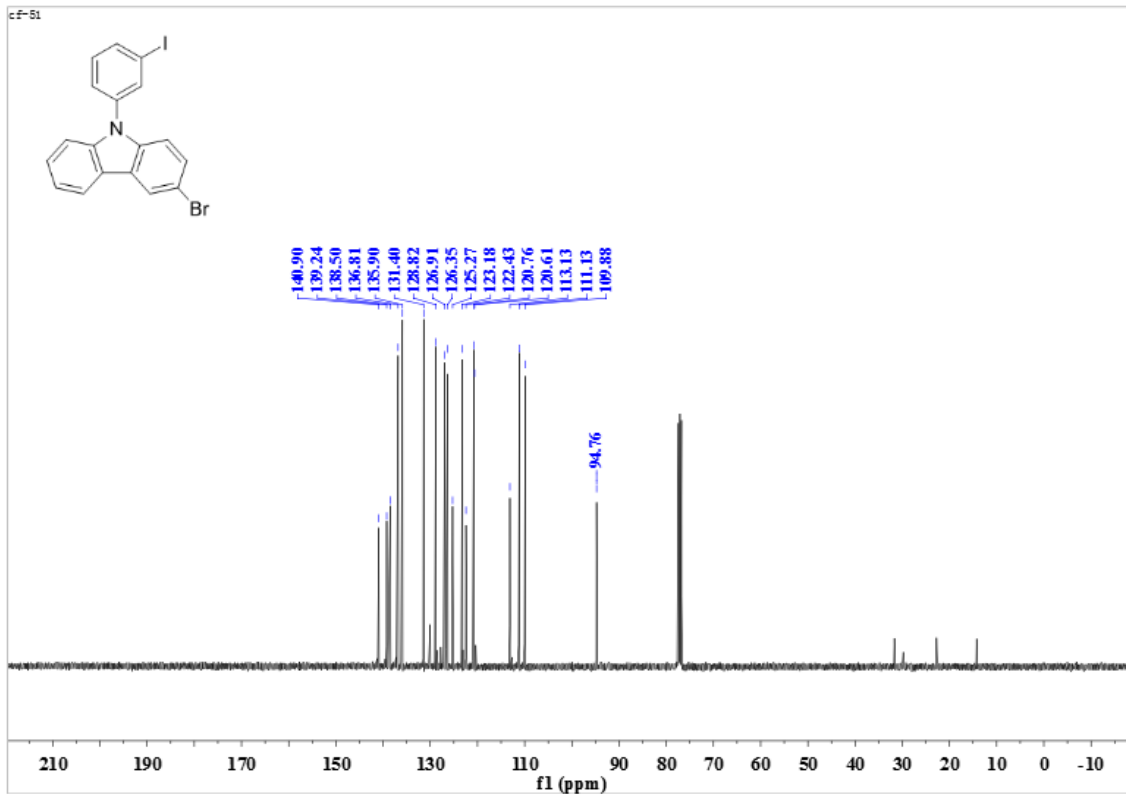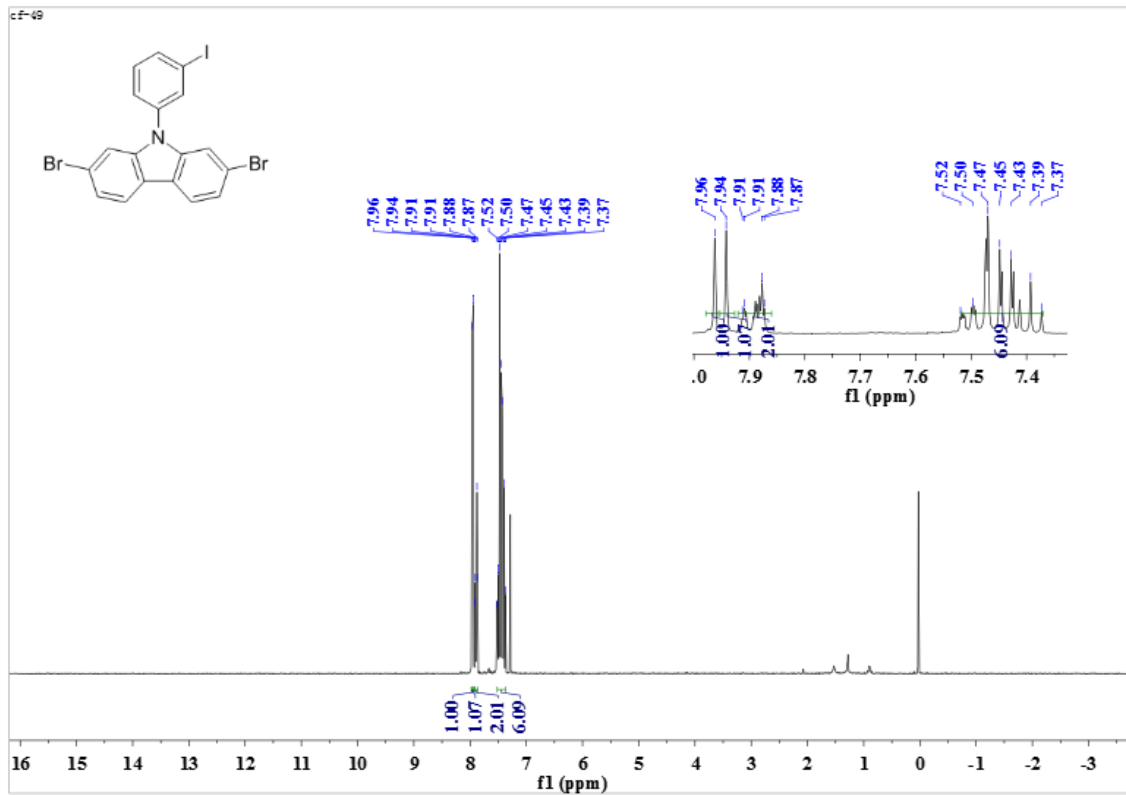

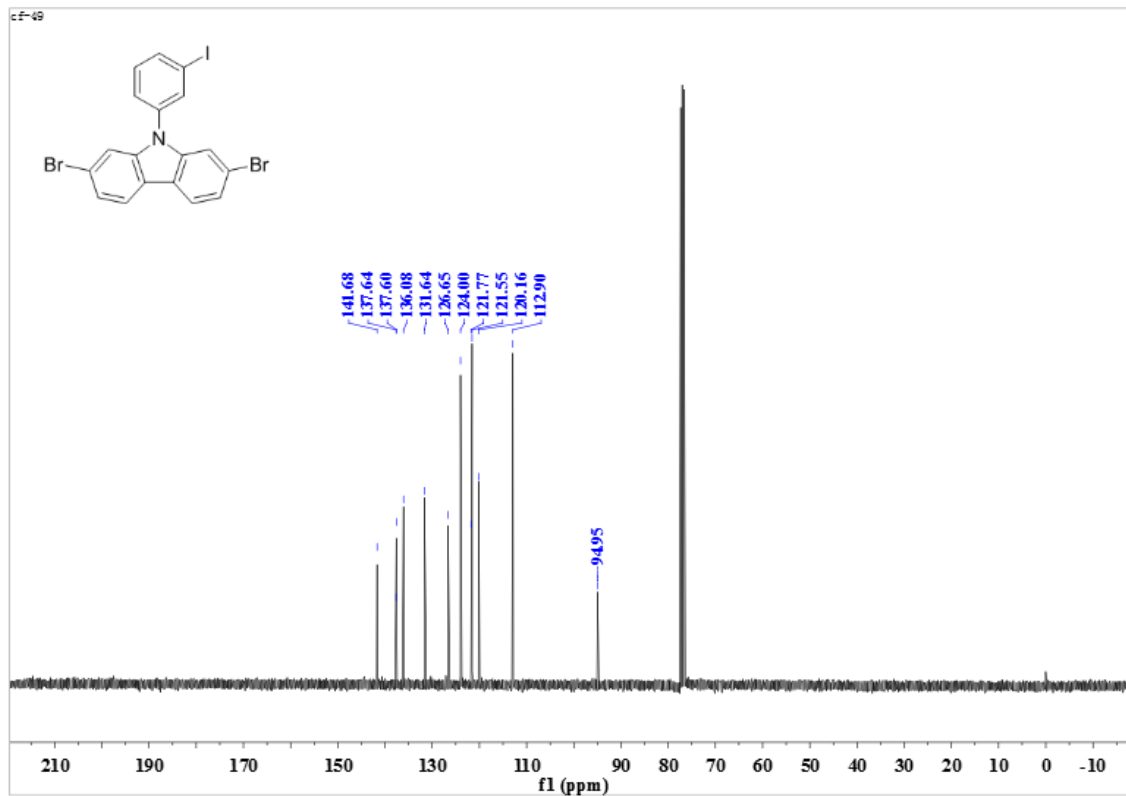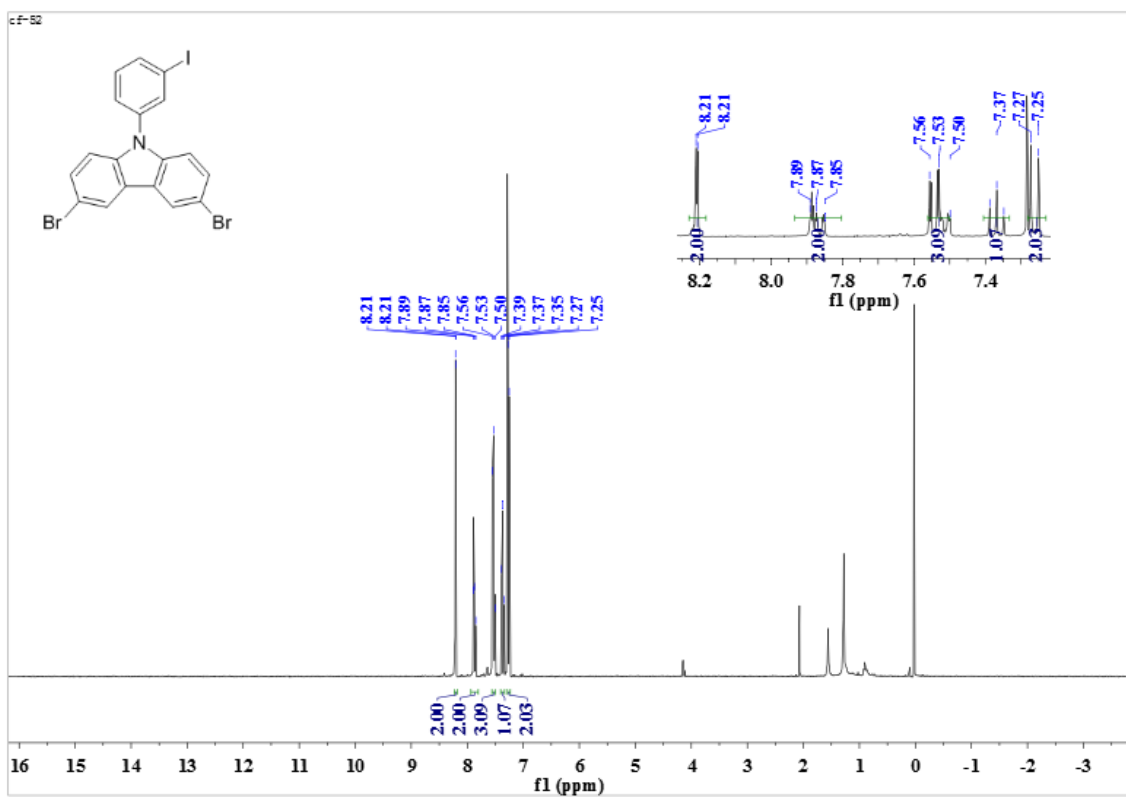

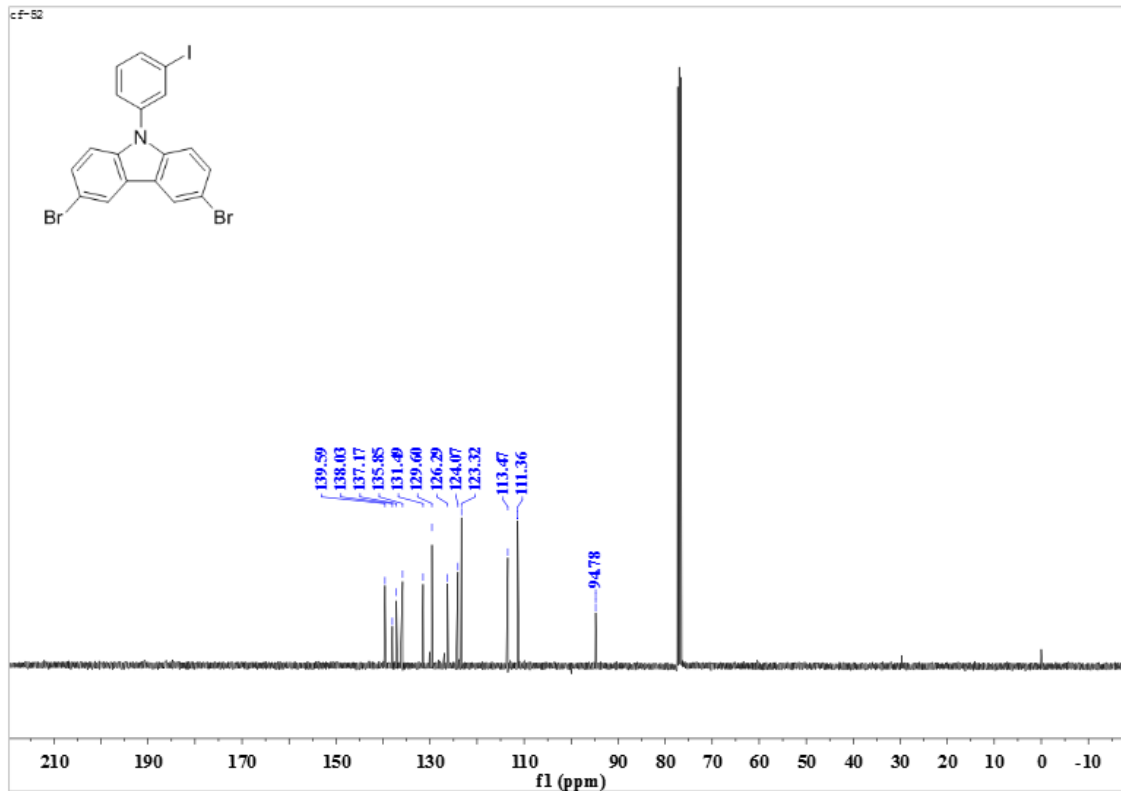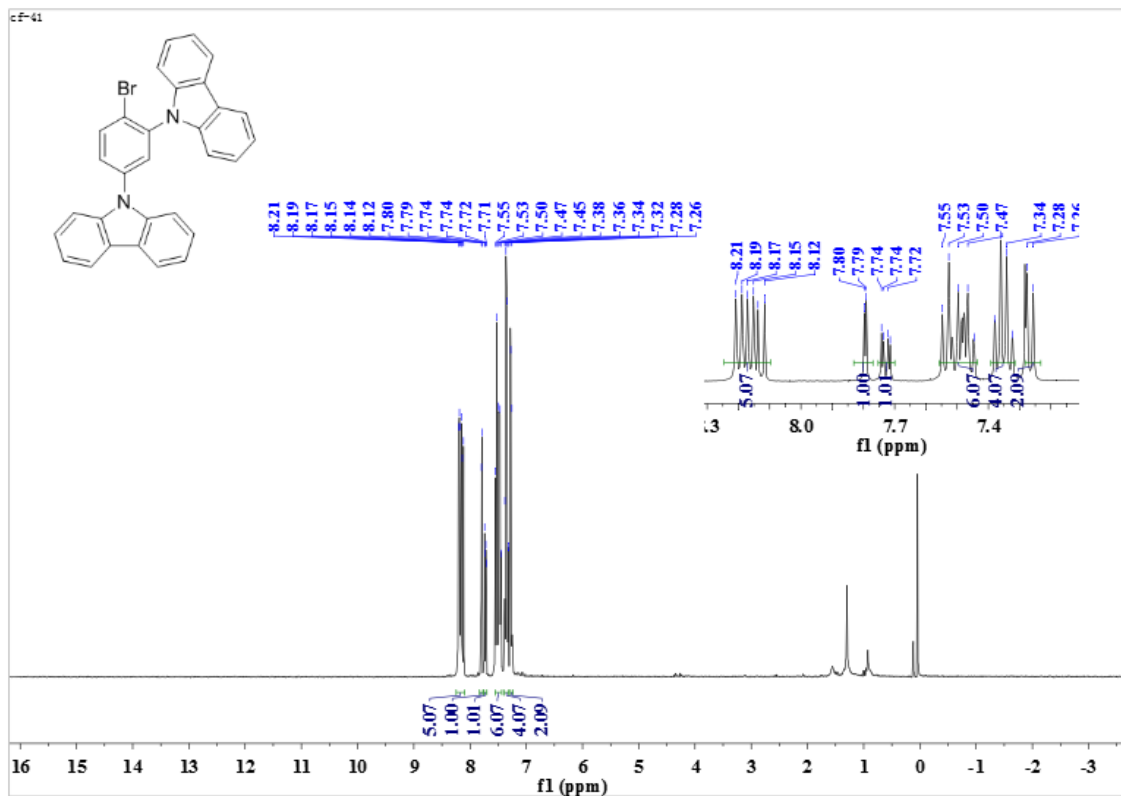



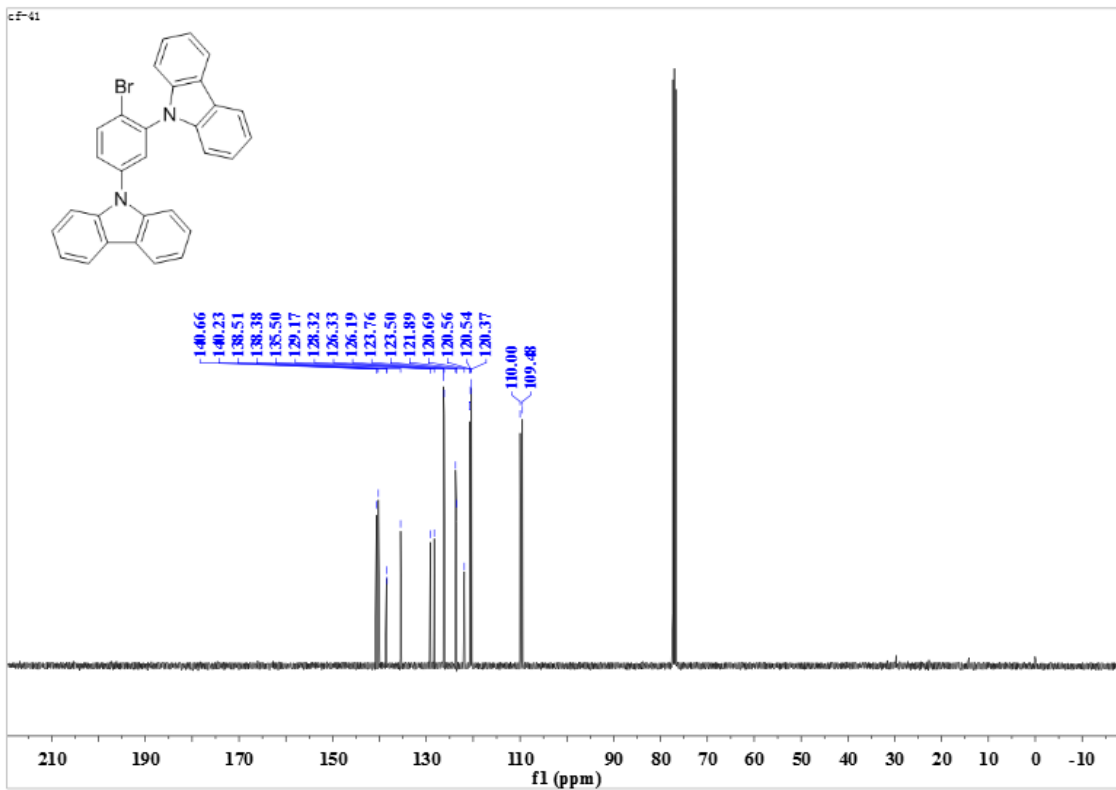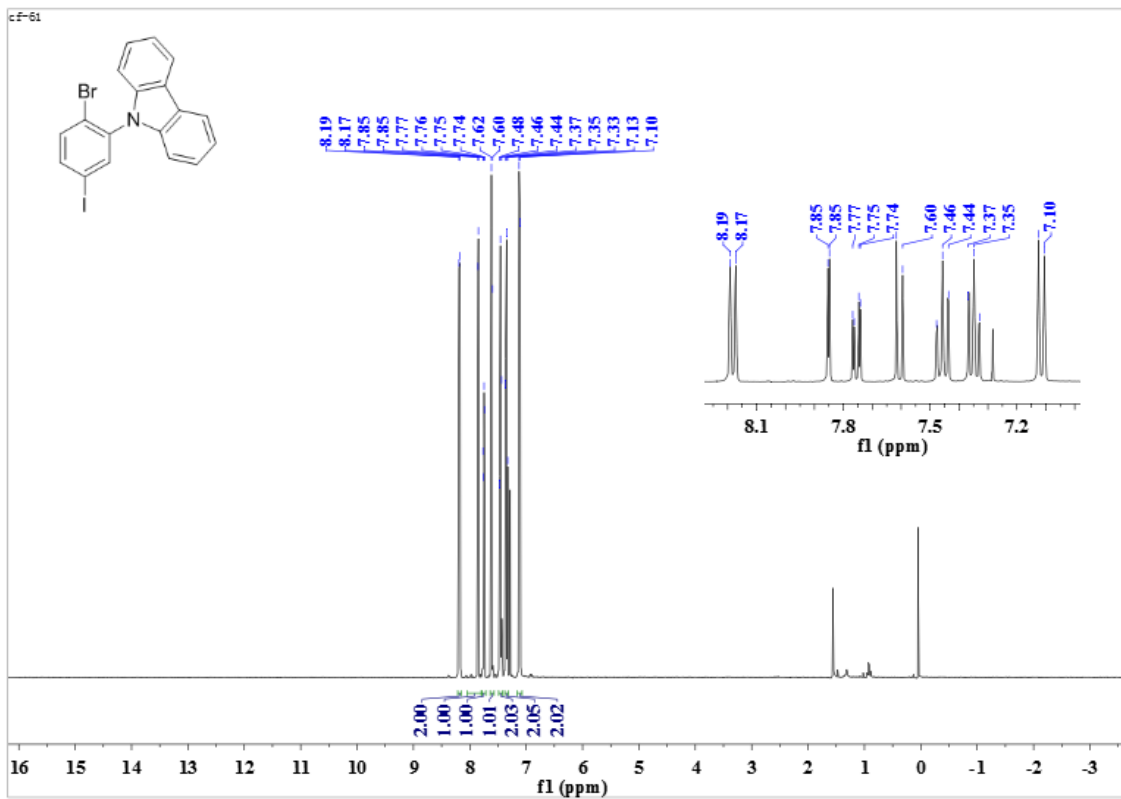

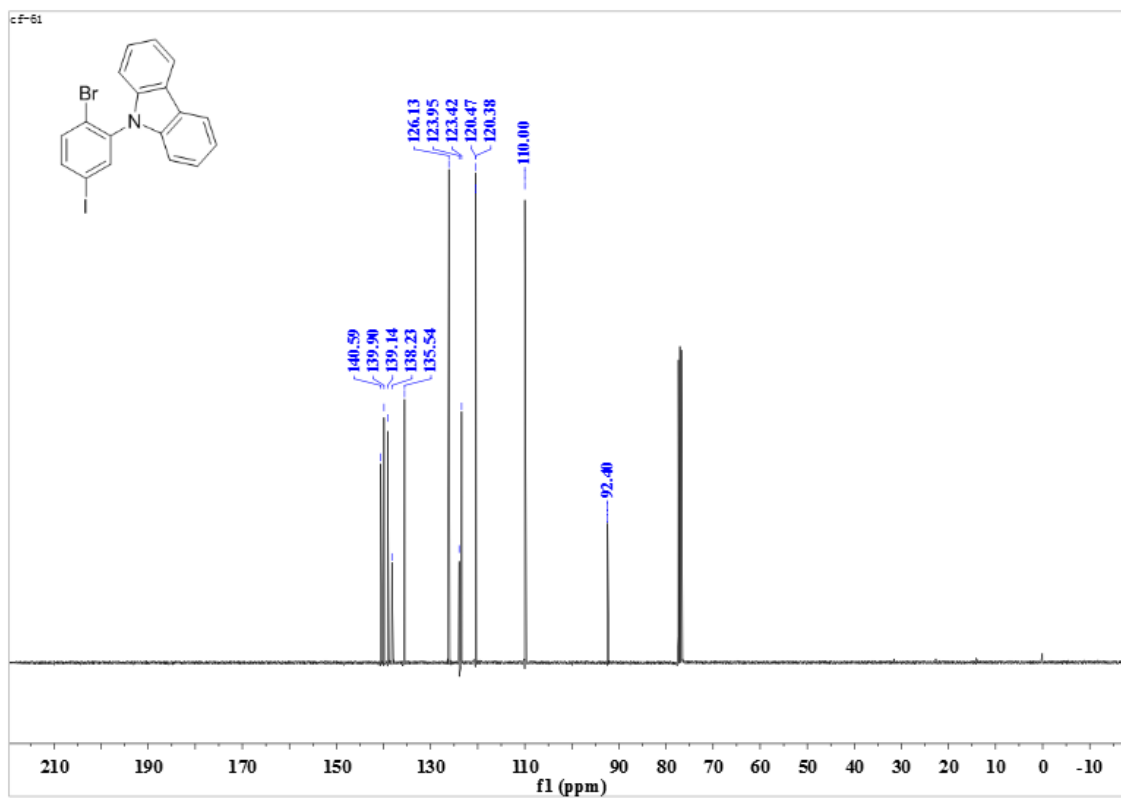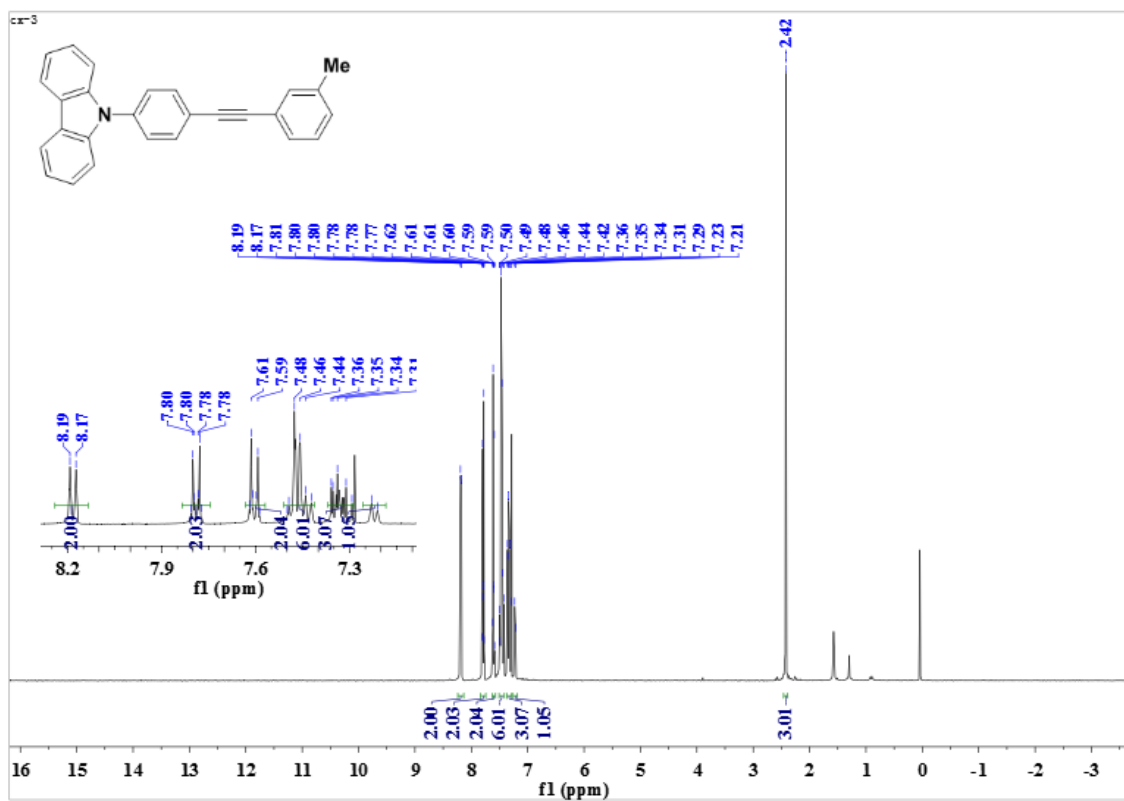

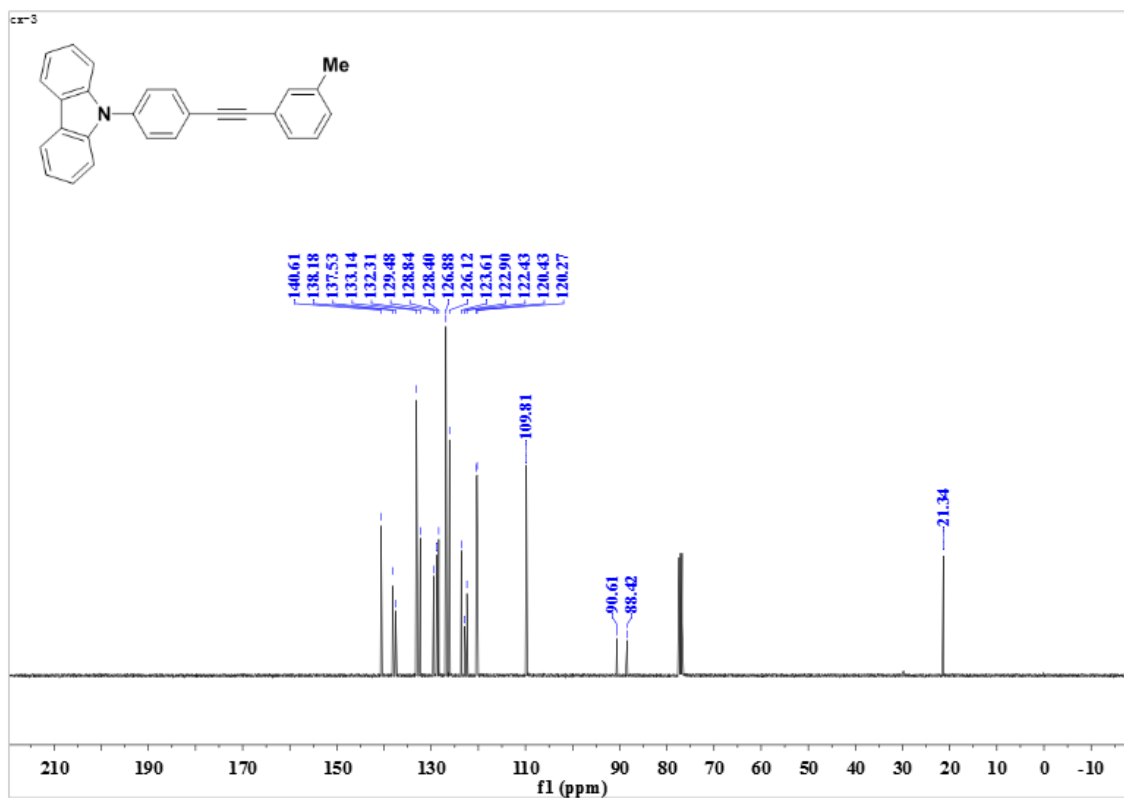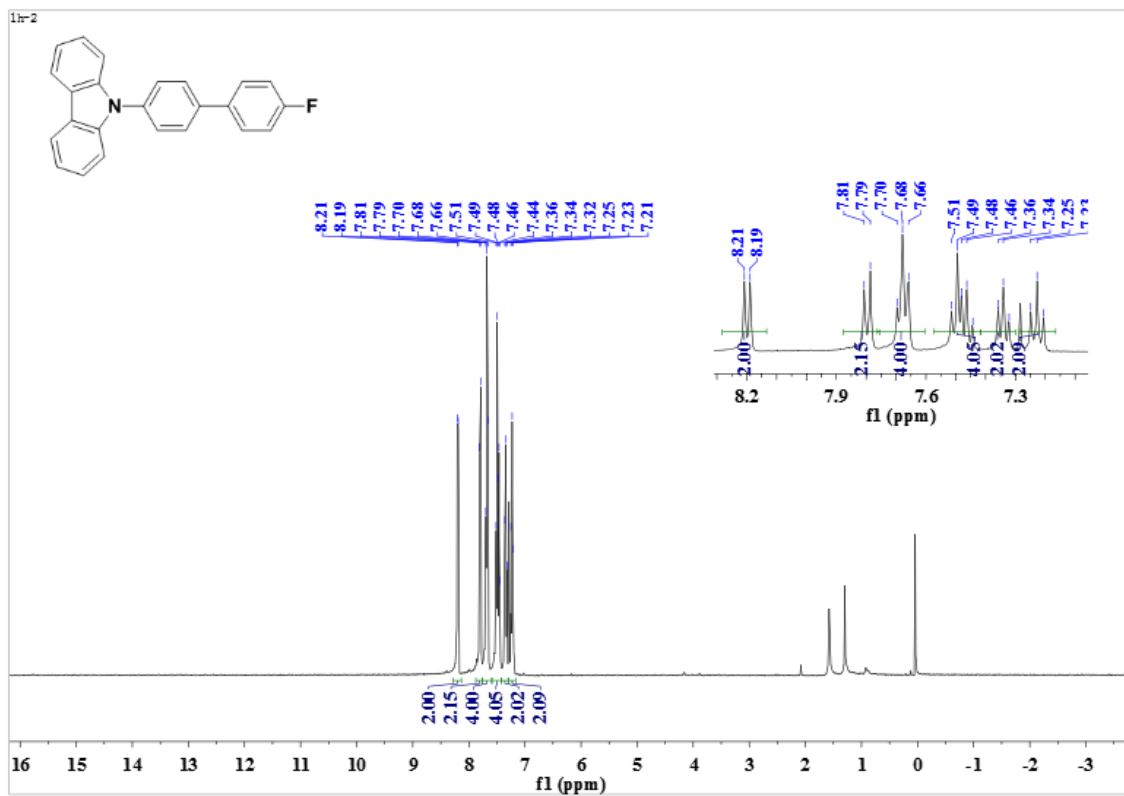

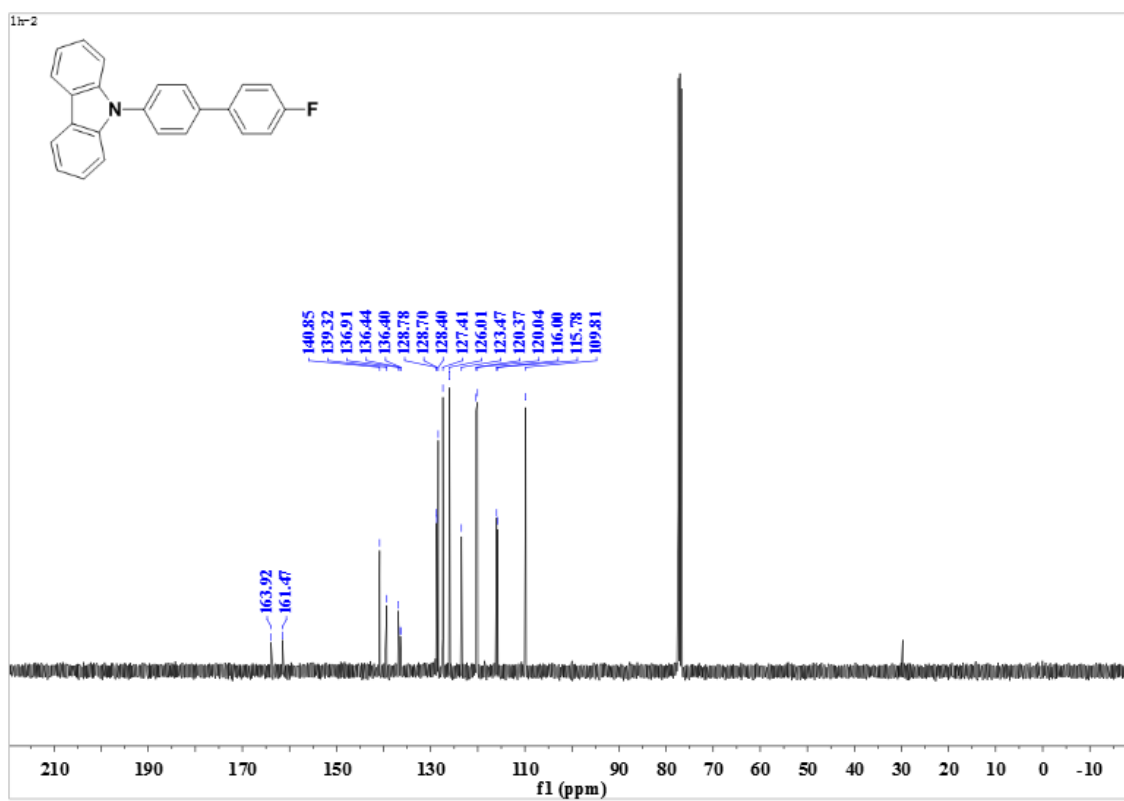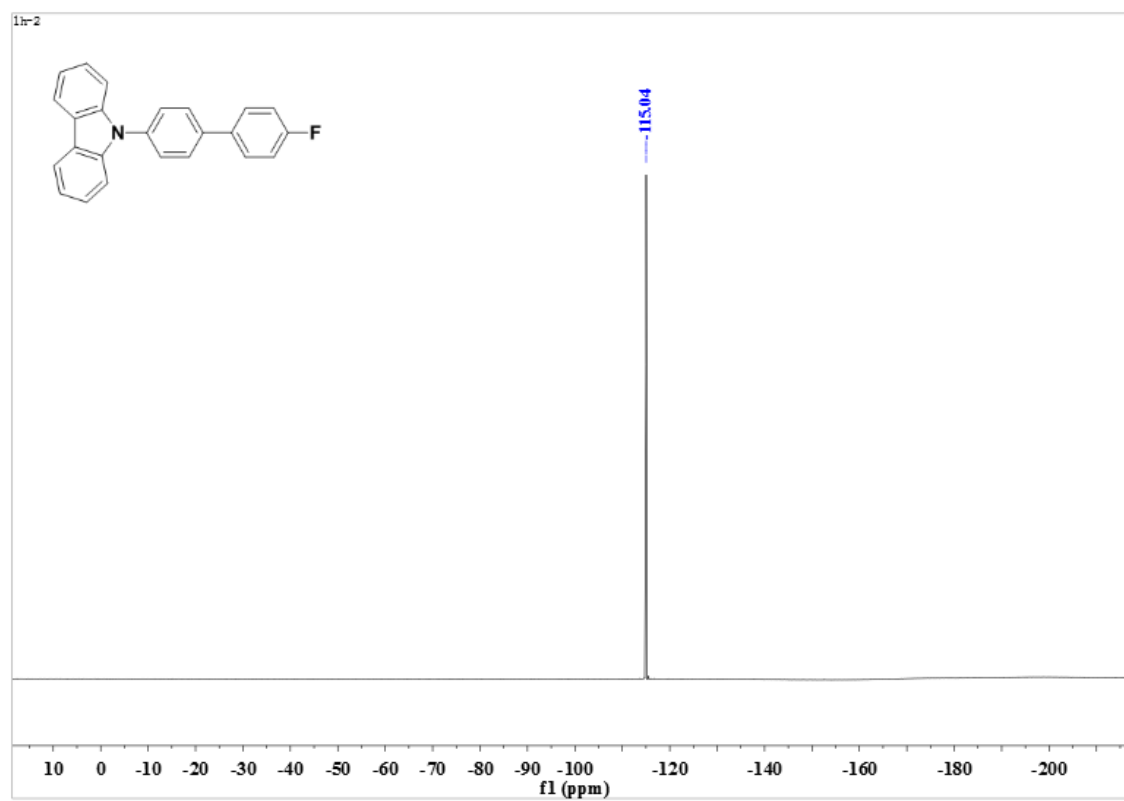

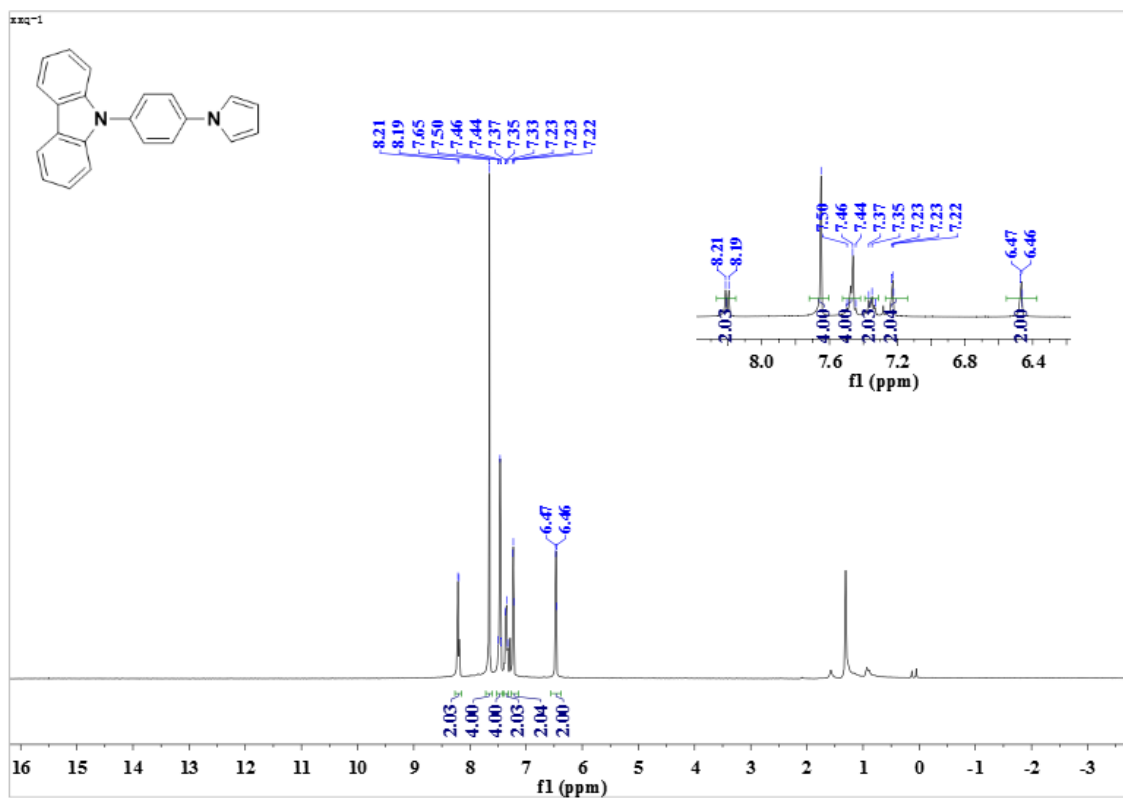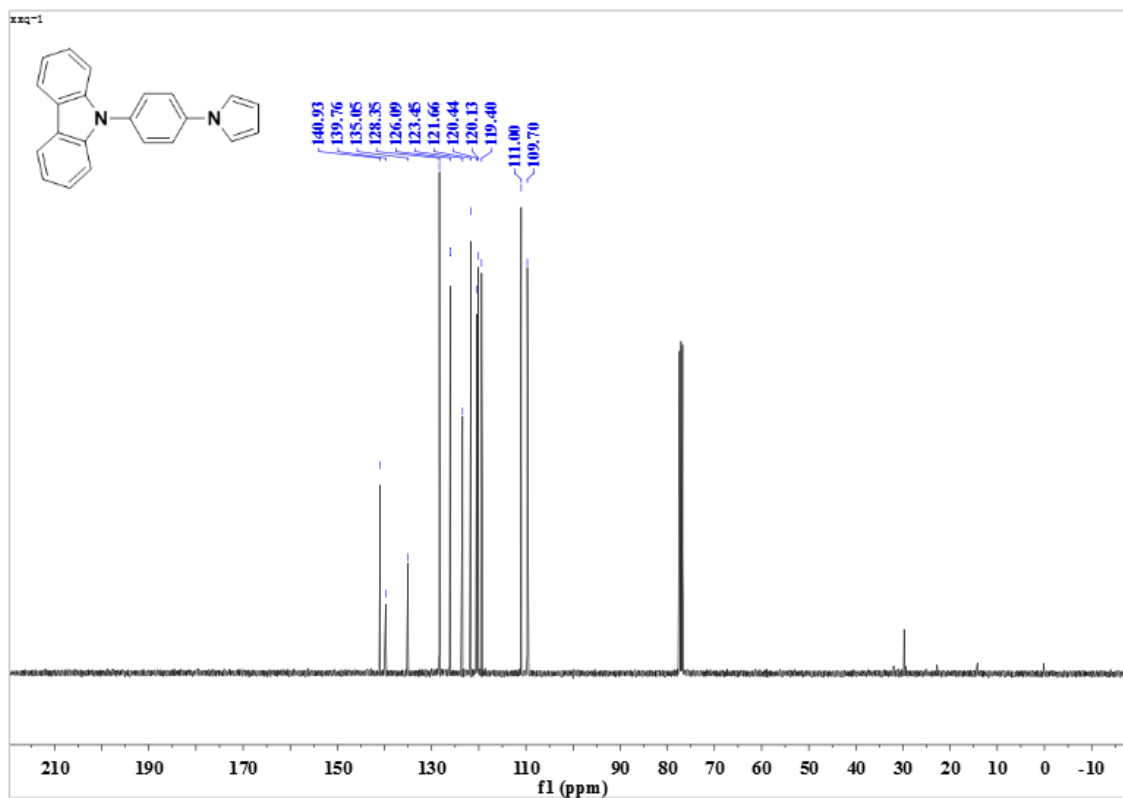

Supplement: c5ra07690k1.pdf [file c5ra07690k1.pdf]
